# Supplementary material for: Divergent synthesis of polysubstituted cyclopropanes and β-silyoxy imidates via switchable additions of N-tert-butanesulfinylimidates to acylsilanes
Source: Royal Society of Chemistry journal article supplement (doi:10.1039/c9cc00963a), 2019-01-01
Supplement: c9cc00963a1.pdf [file c9cc00963a1.pdf]

## Divergent synthesis of polysubstituted cyclopropanes and $\beta$ -silyoxy imidates via switchable additions of *N-tert*-butanesulfinylimidates to acylsilanes

Fan Tang,<sup>†,§</sup> Peng-Ju Ma,<sup>†</sup> Yun Yao,<sup>‡</sup> Yan-Jun Xu,<sup>†</sup> Chong-Dao Lu<sup>\*,†,‡</sup>

<sup>†</sup>Key Laboratory of Plant Resources and Chemistry of Arid Zones, Xinjiang Technical Institute of Physics & Chemistry, Chinese Academy of Sciences, Urumqi 830011, China

<sup>‡</sup>School of Chemical Science and Technology, Yunnan University, Kunming 650091, China

<sup>§</sup>University of Chinese Academy of Sciences, Beijing 100049, China

*E-mail: clu@ms.xjb.ac.cn*

### Table of Contents

|                                                                                   |    |
|-----------------------------------------------------------------------------------|----|
| 1. General experimental information .....                                         | 2  |
| 2. Calculation of diastereomeric ratio .....                                      | 3  |
| 3. Procedure for preparation of products <b>3</b> .....                           | 11 |
| 4. Procedure for preparation of products <b>5</b> .....                           | 18 |
| 5. Procedure for preparation of products <b>4a-c</b> .....                        | 23 |
| 6. Procedure for preparation of product <b>3s</b> .....                           | 24 |
| 7. Procedures for the manipulations of cyclopropane product <b>3ad</b> .....      | 25 |
| 8. <sup>1</sup> H NMR and <sup>13</sup> C NMR spectra for all new compounds ..... | 27 |
| 9. X-Ray crystal structures .....                                                 | 72 |

## 1. General experimental information

All reactions were carried out under a positive pressure of argon atmosphere in flame-dried glass ware with magnetic stirring using standard Schlenk techniques. THF and toluene were freshly distilled from sodium/benzophenone under argon. CH<sub>2</sub>Cl<sub>2</sub> was distilled from CaH<sub>2</sub> prior to use. Other solvents and commercial reagents were used without additional purification otherwise stated. Purification of the reaction products was carried out by flash column chromatography using 200-300 mesh silica gel. Visualization on TLC (thin layer chromatography) was achieved by the use of UV light (254 nm) and treatment with aqueous ceric ammonium molybdate or aqueous KMnO<sub>4</sub> followed by heating. Melting point (m.p.) were measured using a Büchi melting point apparatus M-560 and are uncorrected. High-resolution mass spectra (HRMS) were recorded with an Agilent 6210 ESI-TOF mass spectrometer. Optical rotations were measured on an Autopol IV (Rudolph Research Analytical). Proton and carbon nuclear magnetic resonance spectra (<sup>1</sup>H NMR and <sup>13</sup>C NMR) were recorded on either a Varian Inova 400 MHz (<sup>13</sup>C NMR at 100 MHz) spectrometer with solvent resonance as the internal standard (<sup>1</sup>H NMR: CDCl<sub>3</sub> at 7.26 ppm; <sup>13</sup>C NMR: CDCl<sub>3</sub> at 77.2 ppm). <sup>1</sup>H NMR data are reported as follows: chemical shifts, multiplicity (brs = broad singlet, s = singlet, d = doublet, t = triplet, q = quadruplet, m = multiplet), coupling constants (Hz) and integration.

All *N*-*tert*-butanesulfinyl imidates were prepared from the enantioenriched *tert*-butanesulfinamide (*ee* > 99.0%)<sup>S1</sup> according to the reported procedure.<sup>S2</sup> Acylsilanes were prepared according to the reported procedure.<sup>S3</sup>

## References

- (S1) The enantiomeric excess of the starting *tert*-butylsulfinamide was checked by chiral HPLC: Daicel Chiralpak AD, 25 cm × 0.46 cm; 93:7 *n*-hexane:*i*-PrOH, 1 mL/min; 220 nm; (*R*) RT = 8.86; (*S*) RT = 11.55.
- (S2) (a) Owens, T. D.; Souers, A. J.; Ellman, J. A. *J. Org. Chem.* **2003**, *68*, 3. (b) Colpaert, F.; Mangelinckx, S.; Verniest, G.; DeKimpe, N. *J. Org. Chem.* **2009**, *74*, 3792. (c) Kochi, T.; Ellman, J. A. *J. Am. Chem. Soc.* **2004**, *126*, 15652. (d) Huang, H.-X.; Wang, H.-J.; Tan, L.; Wang, S.-Q.; Tang, P.; Song, H.; Liu, X.-Y.; Qin, Y. *J. Org. Chem.* **2016**, *81*, 10506–10516. (e) Ma, P.-J.; Liu, H.; Xu, Y.-J.; Aisa, H. A.; Lu, C.-D. *Org. Lett.* **2018**, *20*, 1236–1239.
- (S3) Linghu, X.; Nicewicz, D. A.; Johnson, J. S. *Org. Lett.* **2002**, *4*, 2957.

## 2. Calculation of diastereomeric ratio

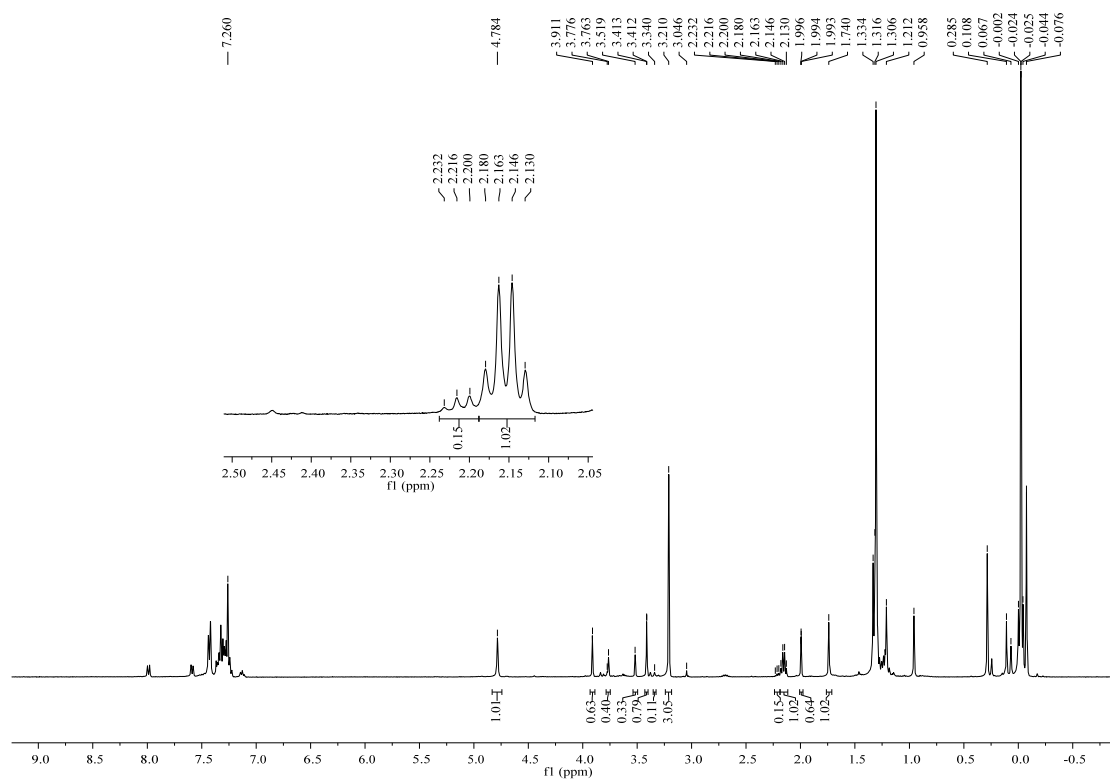

Crude <sup>1</sup>H NMR of **3aa** (Table 1, entry 1, dr ~ 7:1)

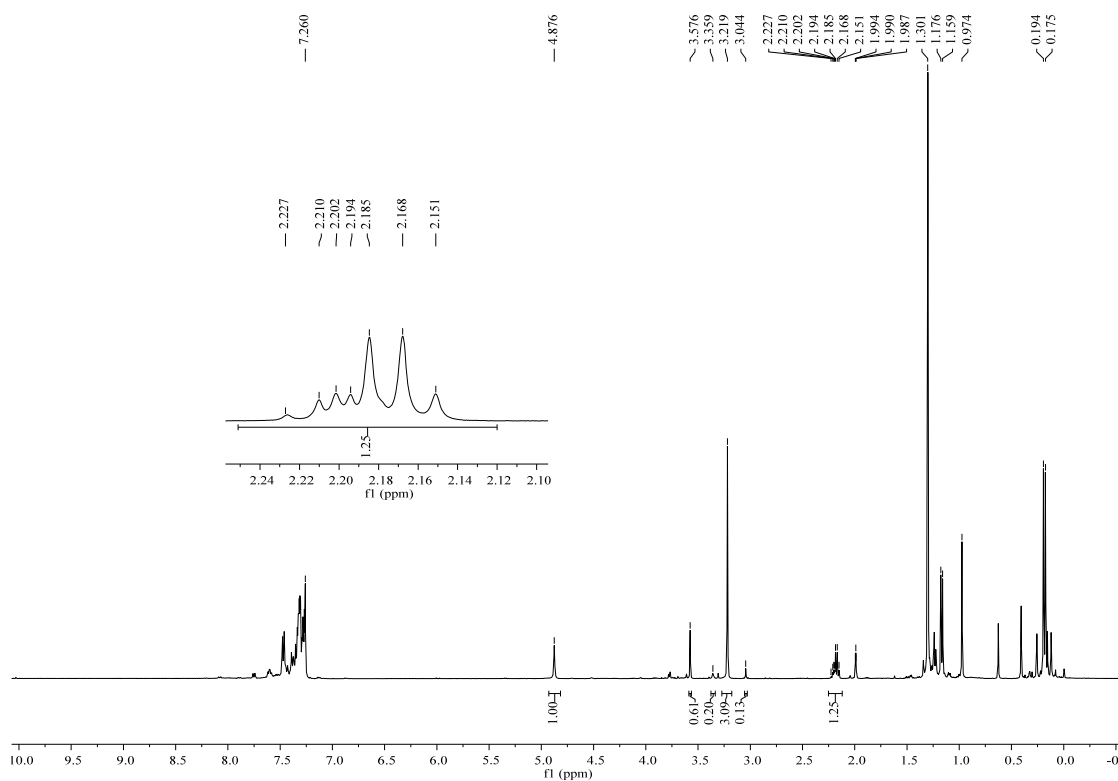

Crude <sup>1</sup>H NMR of **3ab** (Table 1, entry 2, dr ~ 4:1)

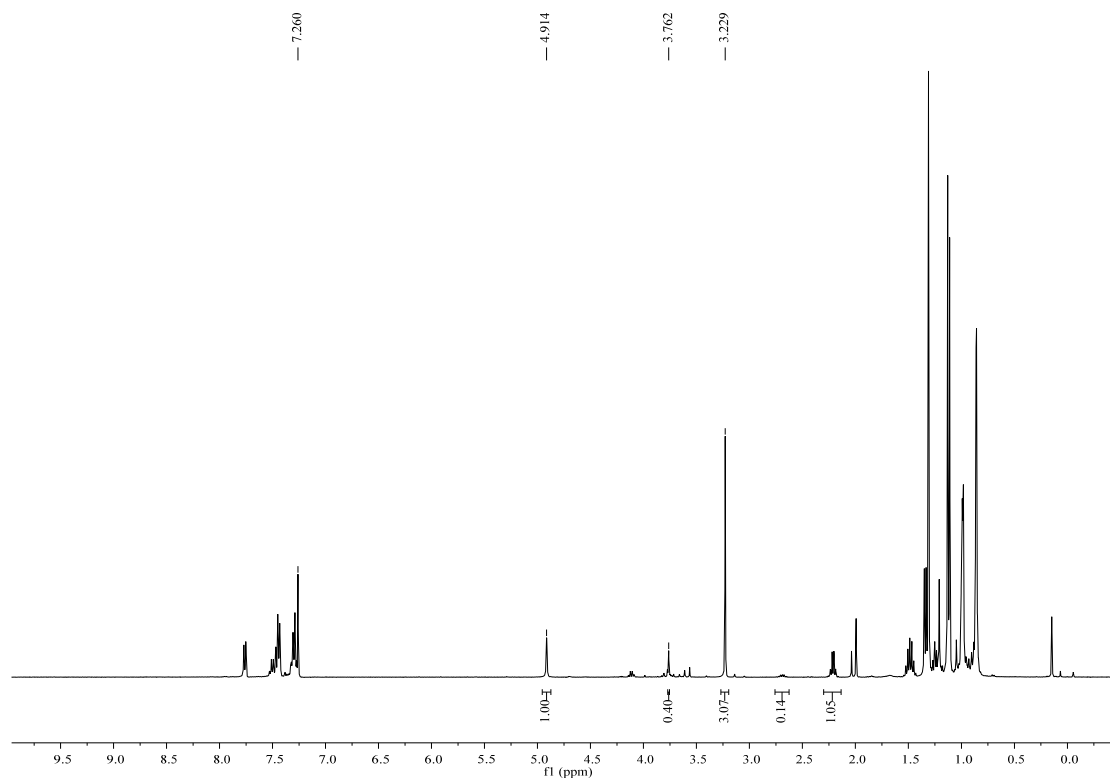

Crude  $^1\text{H}$  NMR of **3ac** (Table 1, entry 3, dr ~ 7.5:1)

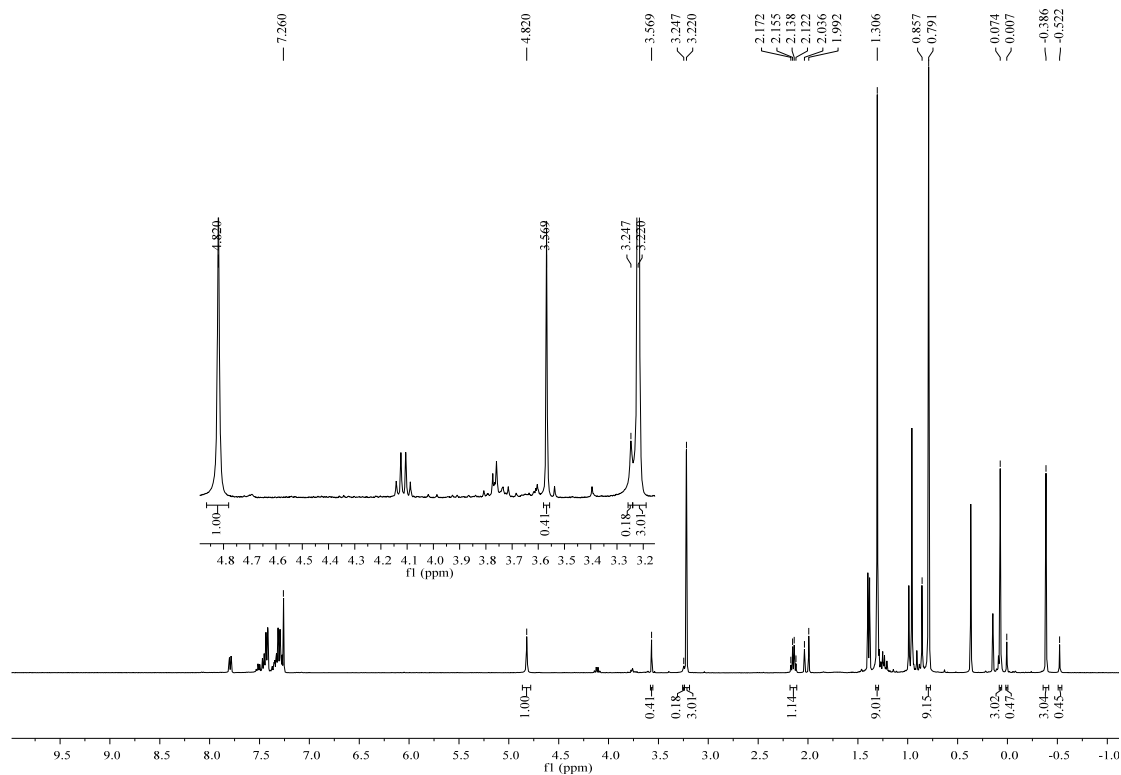

Crude  $^1\text{H}$  NMR of **3ad** (Table 1, entry 4, dr ~ 7:1)

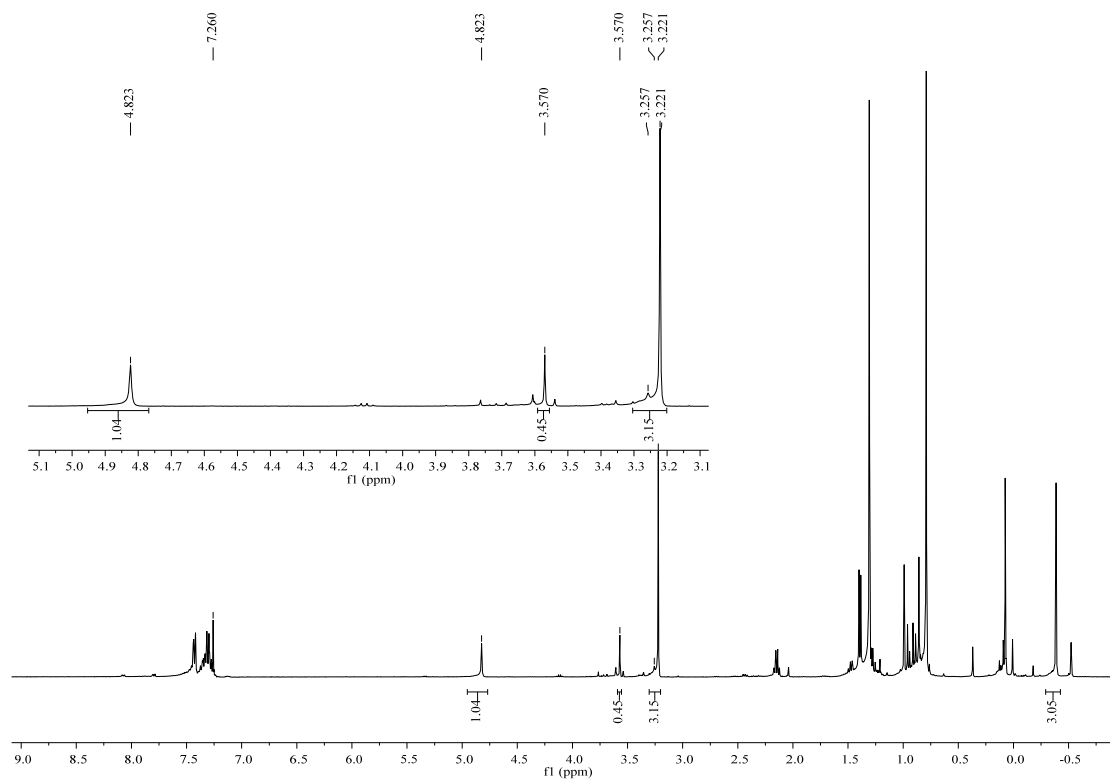

Crude  $^1\text{H}$  NMR of **3ad** (Table 1, entry 5, dr ~ 7:1)

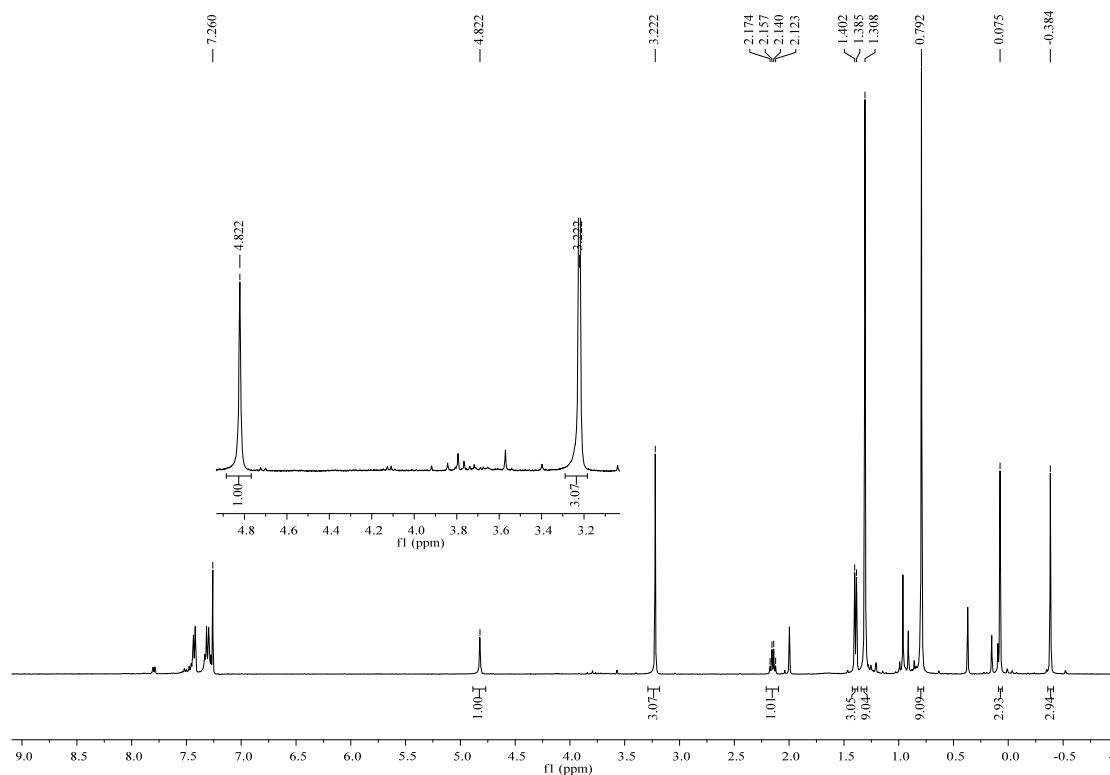

Crude  $^1\text{H}$  NMR of **3ad** (Table 1, entry 6, dr > 20:1)

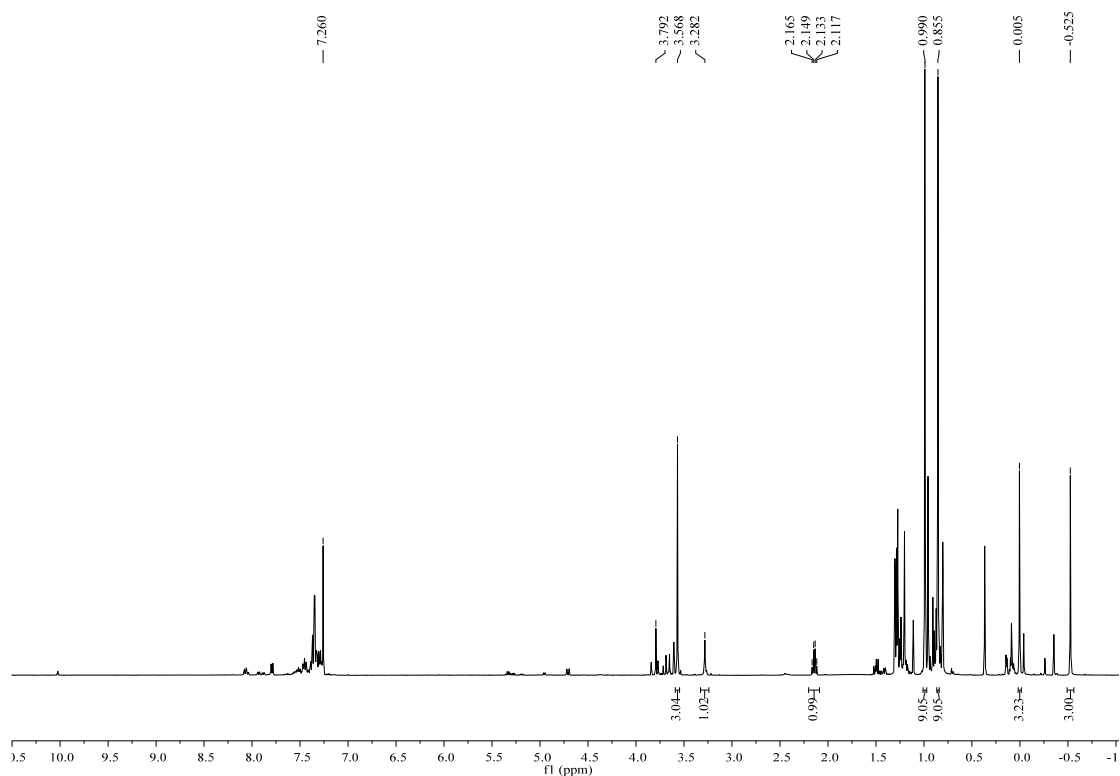

Crude  $^1\text{H}$  NMR of **4a** (Table 1, entry 7, dr > 20:1)

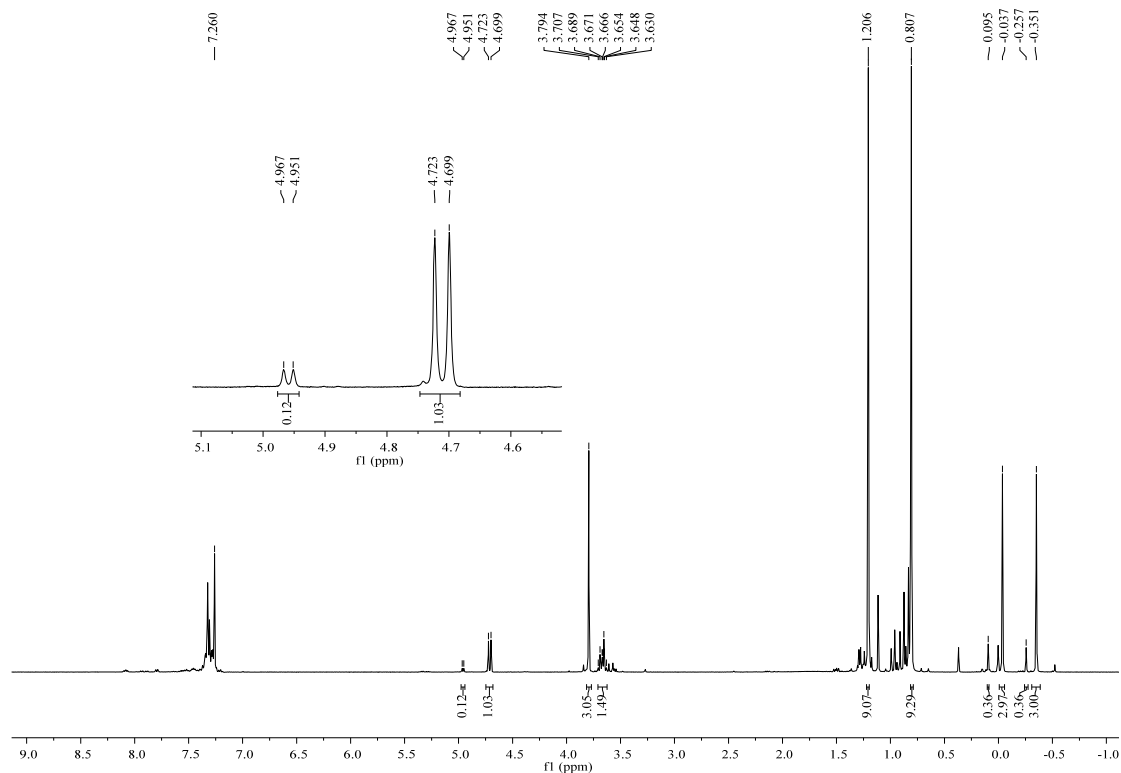

Crude  $^1\text{H}$  NMR of **5a** (Table 1, entry 8, dr ~ 8:1)

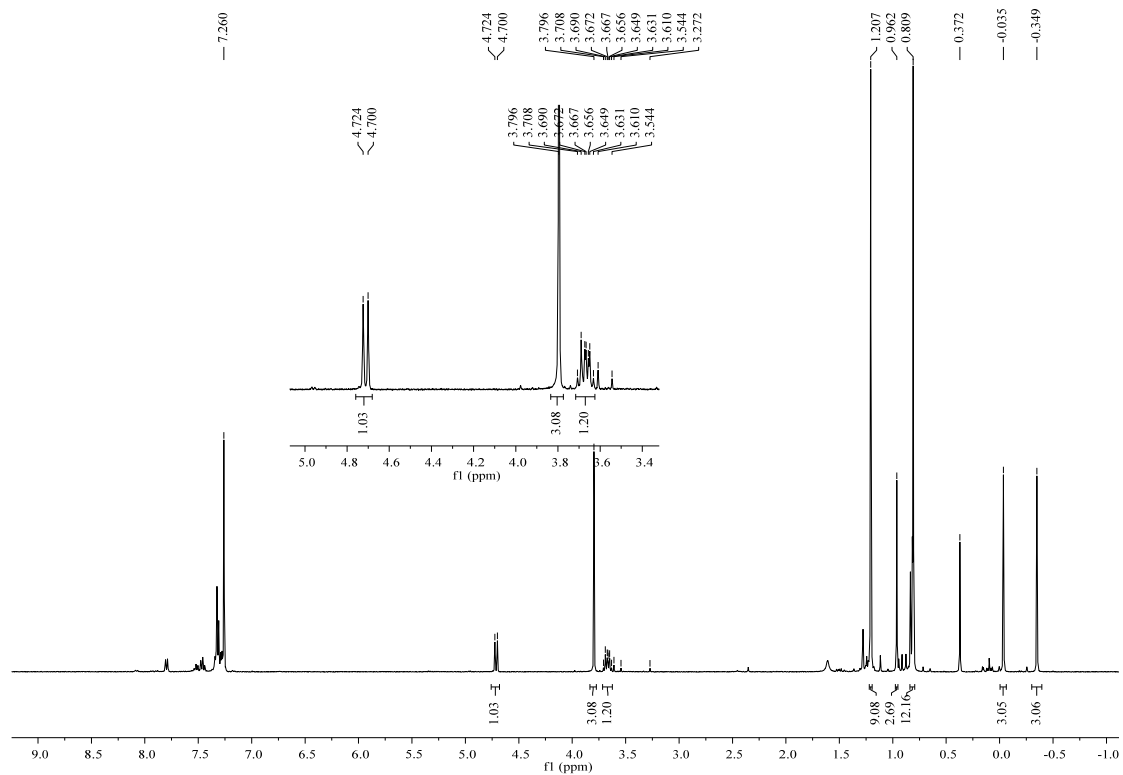

Crude  $^1\text{H}$  NMR of **5a** (Table 1, entry 9, dr > 20:1)

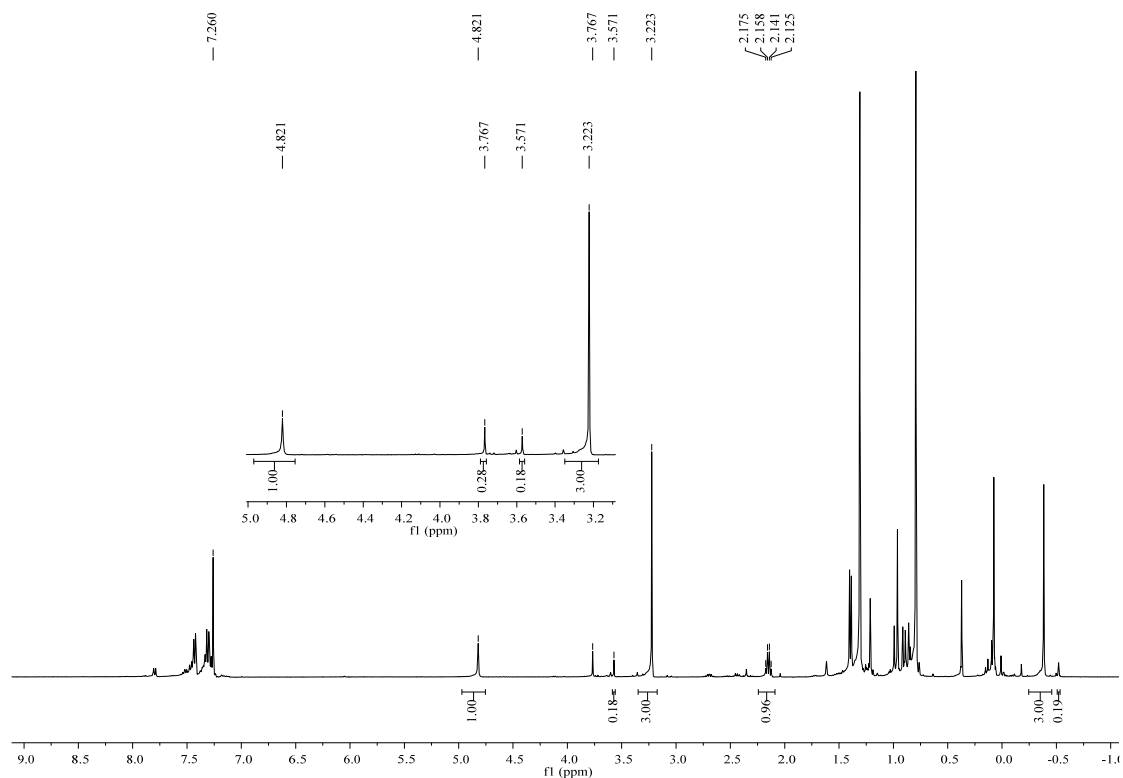

Crude  $^1\text{H}$  NMR of **3ad** (Table 1, entry 10, dr ~ 17:1)

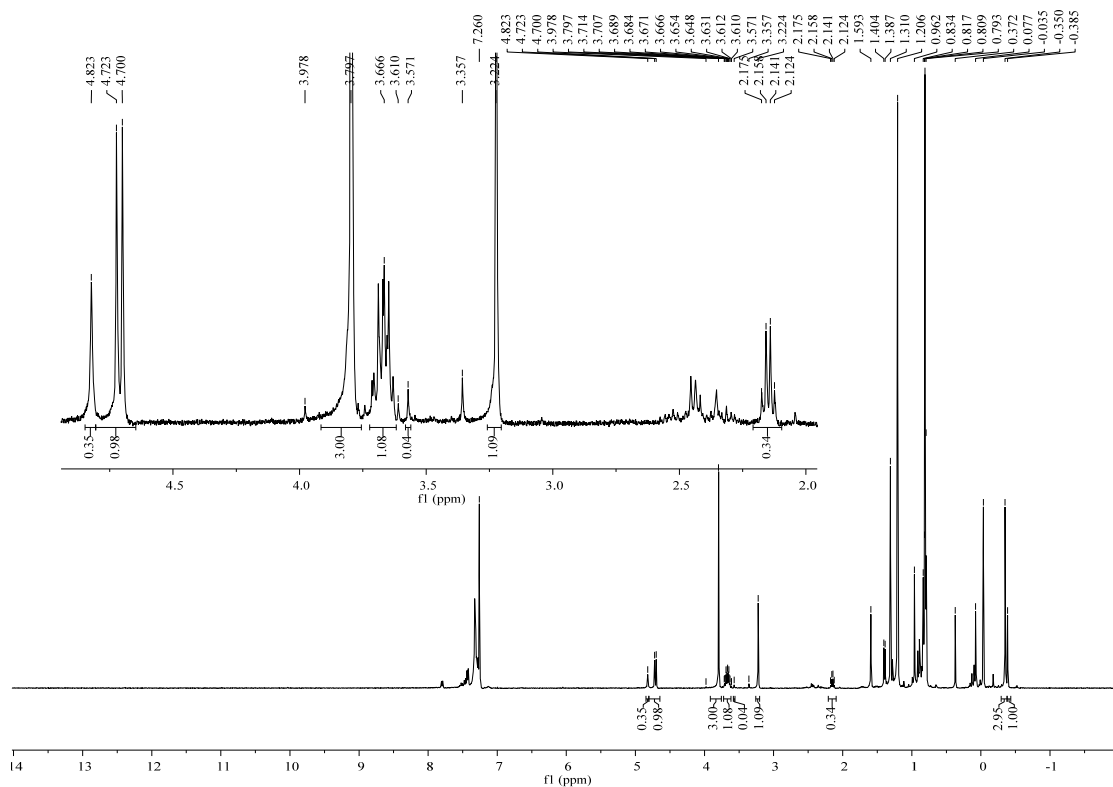

Crude  $^1\text{H}$  NMR of **5a** (Table 1, entry 11, dr > 20:1)

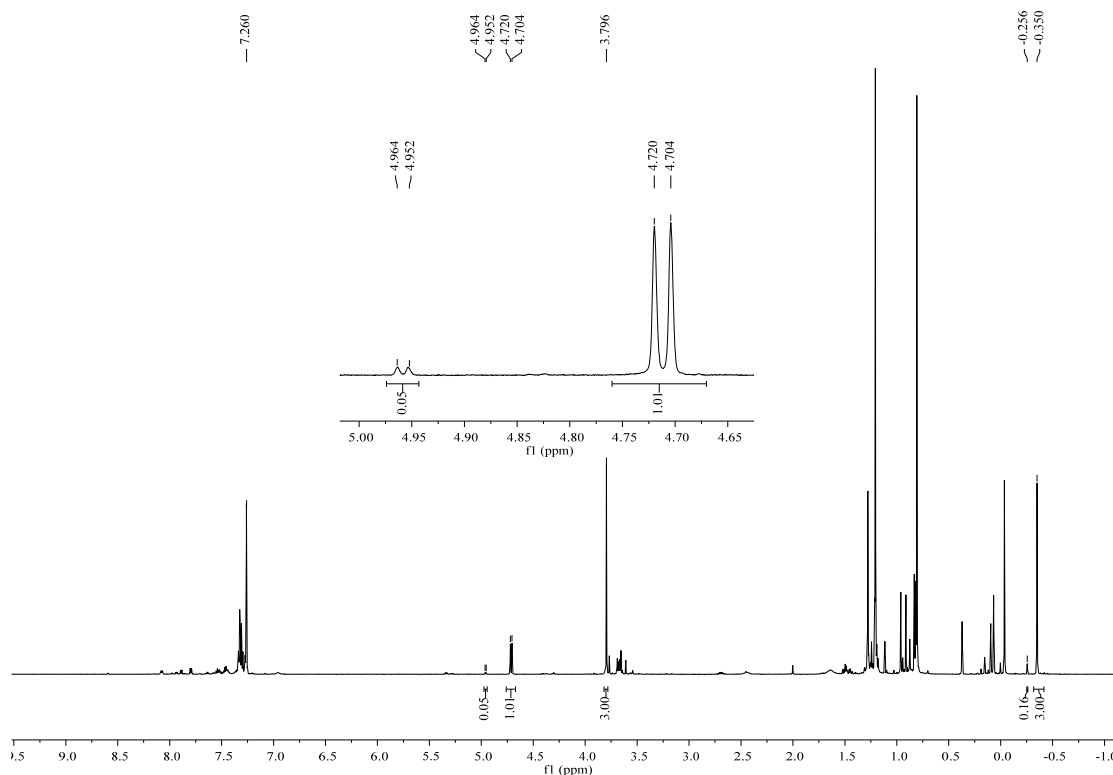

Crude  $^1\text{H}$  NMR of **5a** (Table 1, entry 12, dr ~ 20:1)



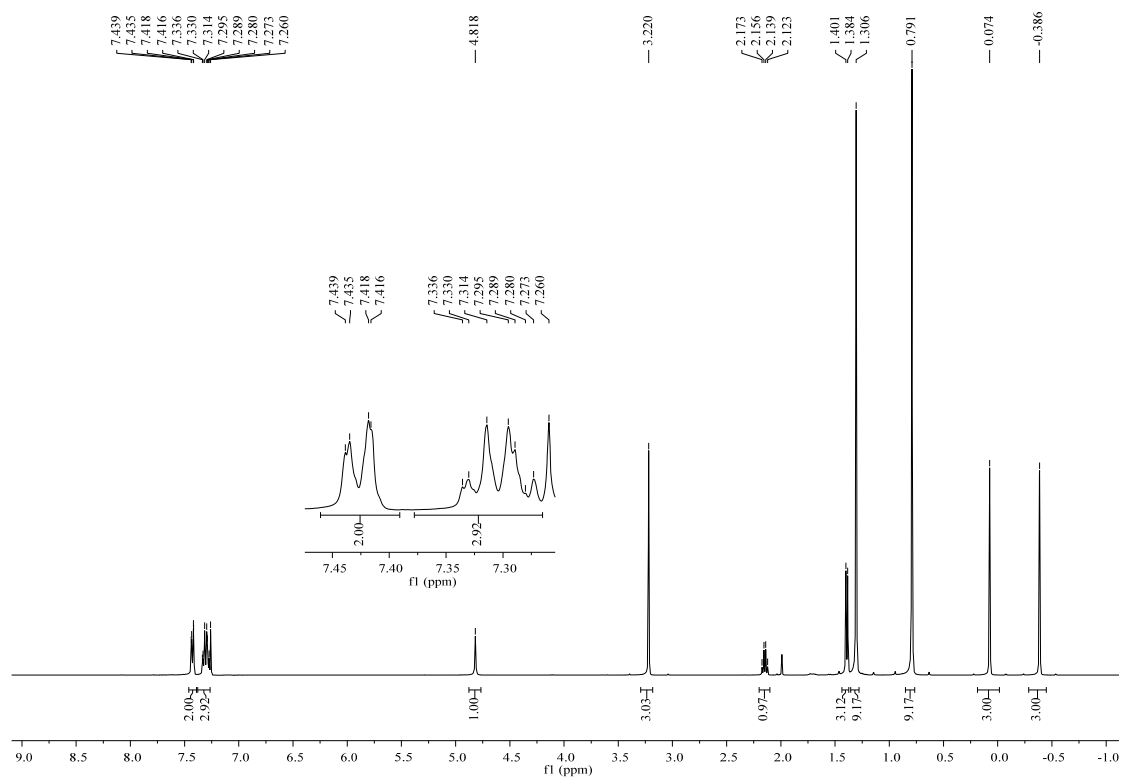

$^1\text{H}$  NMR spectrum ( $\text{CDCl}_3$ , 400 MHz) of **3ad**

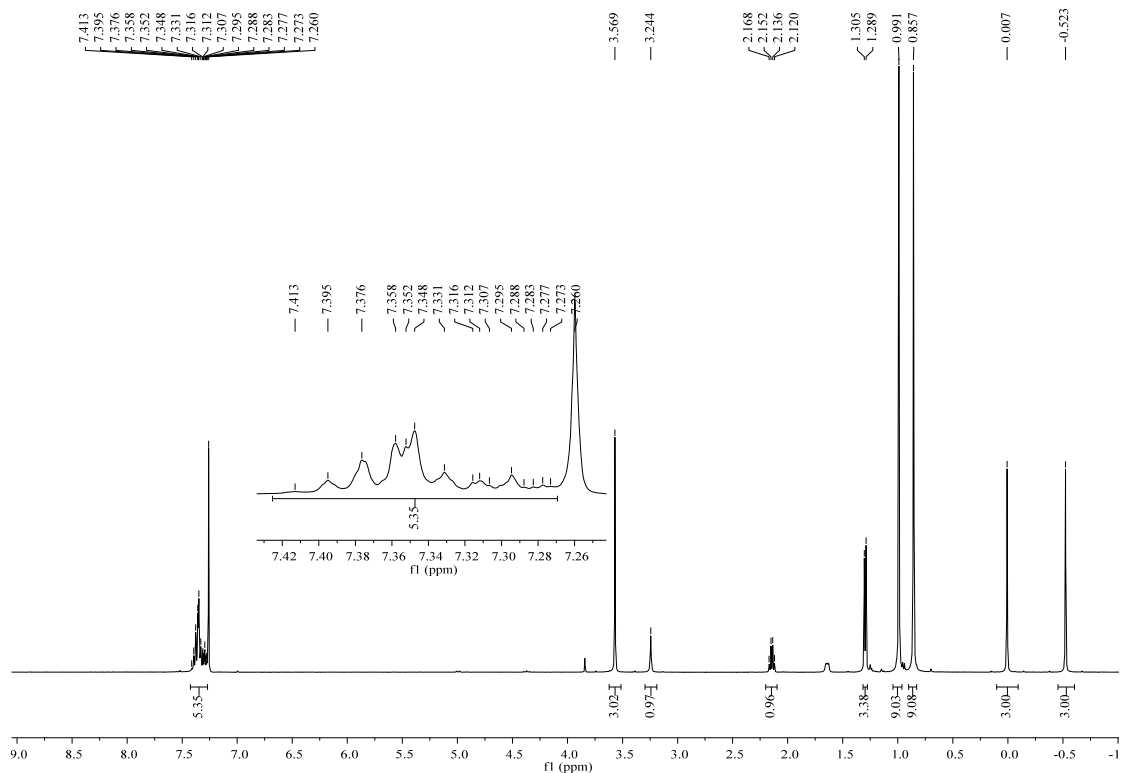

$^1\text{H}$  NMR spectrum ( $\text{CDCl}_3$ , 400 MHz) of **4a**

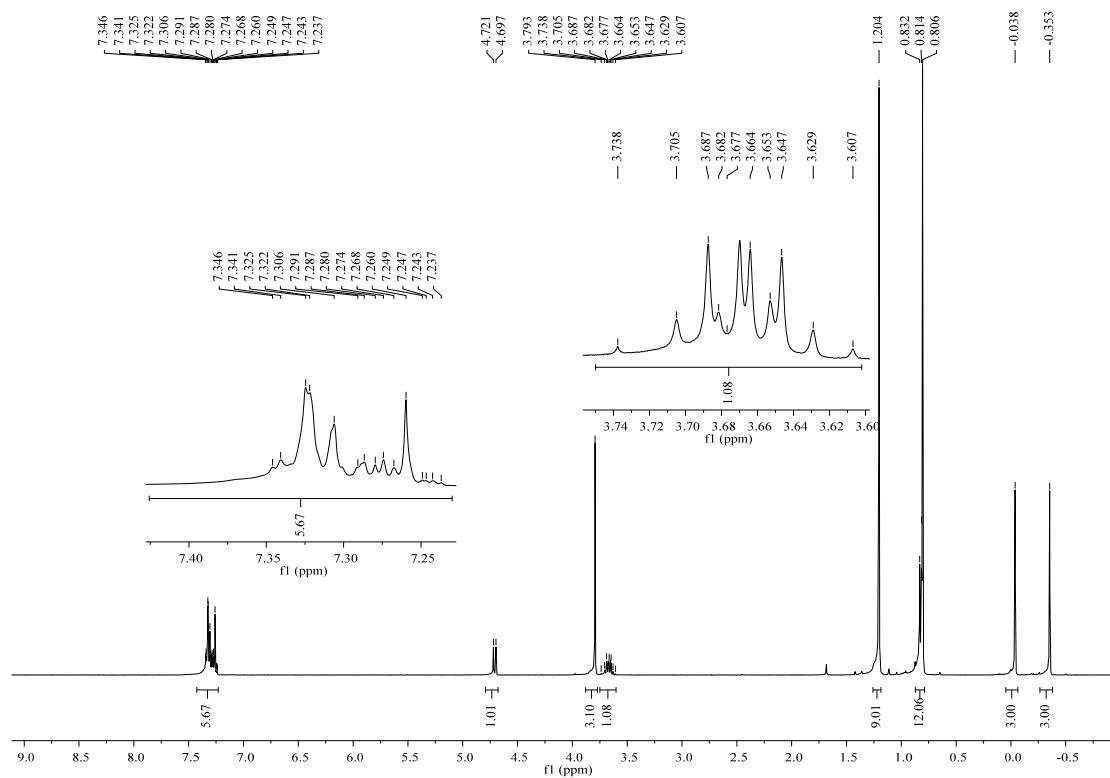

$^1\text{H}$  NMR spectrum ( $\text{CDCl}_3$ , 400 MHz) of **5a**

### 3. Procedure for preparation of cyclopropane products 3ad and 3b–3r

A solution of *N*-*tert*-butanesulfinylimidate (0.30 mmol, 1.0 equiv) in 2.0 mL THF was added to a flame-dried schlenk flask equipped with a magnetic stirring bar and purged with argon. The solution was cooled to  $-78$  °C. Then, NaHMDS (2.0 M in THF, 180  $\mu$ L, 0.36 mmol, 1.2 equiv) was added dropwise to the solution by syringe. After the reaction mixture was stirred for 30 min at  $-78$  °C, the solution of acylsilane (0.39 mmol, 1.3 equiv) in 2.0 mL THF was added to the reaction mixture via syringe. The reaction mixture was stirred for 1 h at  $-78$  °C. Then, the reaction was quenched with saturated aqueous ammonium chloride and extracted with ethyl acetate (3 times). The combined organic layers were washed with brine, dried over Na<sub>2</sub>SO<sub>4</sub>, filtered, and concentrated under vacuum. The residue was purified by flash column chromatography on silica gel.

#### Analytical data for cyclopropane products 3

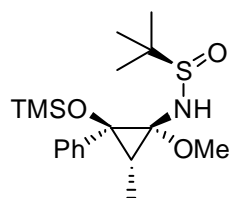

**(3aa)** The title compound was prepared using imidate **1a** (57.4 mg, 0.30 mmol, 1.0 equiv), LiHMDS (1.2 M in THF, 0.30 mL, 0.36 mmol, 1.2 equiv) and acylsilane **2a** (69.5 mg, 0.39 mmol, 1.3 equiv). Column chromatography afforded 85.4 mg (69 %) of **3aa** as a white solid. Analytical data for **3aa**: m.p. 131–133 °C;  $R_f$  = 0.30 (petroleum/ ethyl acetate = 5:1);  $[\alpha]_D^{20}$  =  $-25.1$ ; <sup>1</sup>H NMR (400 MHz, CDCl<sub>3</sub>)  $\delta$  7.44–7.42 (m, 2H), 7.34–7.27 (m, 3H), 4.78 (s, 1H), 3.21 (s, 3H), 2.15 (q,  $J$  = 6.8 Hz, 1H), 1.32 (d,  $J$  = 6.4 Hz, 3H), 1.30 (s, 9H),  $-0.03$  (s, 9H); <sup>13</sup>C NMR (100 MHz, CDCl<sub>3</sub>)  $\delta$  136.5, 130.5, 128.1, 127.7, 75.6, 64.9, 56.4, 53.8, 32.2, 22.7, 10.5, 0.81; HRMS (ESI-TOF)  $m/z$   $[M + H]^+$  calcd for C<sub>18</sub>H<sub>32</sub>NO<sub>3</sub>SSi 370.1867, found 370.1865.

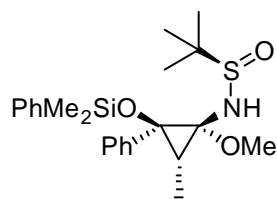

**(3ab)** The title compound was prepared using imidate **1a** (57.4 mg, 0.30 mmol, 1.0 equiv), LiHMDS (1.2 M in THF, 0.30 mL, 0.36 mmol, 1.2 equiv) and acylsilane **2b** (93.7 mg, 0.39 mmol, 1.3 equiv). Column chromatography afforded 93.2 mg (72 %) of **3ab** as a white amorphous solid. Analytical data for **3ab**:  $R_f$  = 0.27 (petroleum/ ethyl acetate = 5:1);  $[\alpha]_D^{20}$  =  $-8.1$  (c 0.31, MeOH); <sup>1</sup>H NMR (400 MHz, CDCl<sub>3</sub>)  $\delta$  7.48–7.46 (m, 2H), 7.37–7.31 (m, 5H), 7.29–7.26 (m, 3H), 4.87 (s, 1H), 3.22 (s, 3H), 2.18 (q,  $J$  = 6.8 Hz, 1H), 1.30 (s, 9H), 1.17 (d,  $J$  = 6.8 Hz, 3H), 0.20 (s, 3H), 0.18 (s, 3H); <sup>13</sup>C NMR (100 MHz, CDCl<sub>3</sub>)  $\delta$  137.5, 136.1, 133.9, 131.0, 129.7, 128.0, 127.9, 127.7, 75.4, 56.5, 53.9, 32.4, 22.7, 10.8,  $-0.63$ ,  $-0.91$ ; HRMS (ESI-TOF)  $m/z$   $[M + Na]^+$  calcd for C<sub>23</sub>H<sub>33</sub>NNaO<sub>3</sub>SSi 454.1843, found 454.1838.

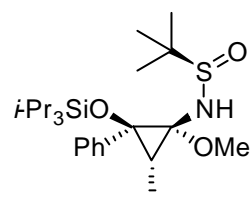

**(3ac)** The title compound was prepared using imidate **1a** (57.4 mg, 0.30 mmol, 1.0 equiv), LiHMDS (1.2 M in THF, 0.30 mL, 0.36 mmol, 1.2 equiv) and acylsilane **2c** (102.4 mg, 0.39 mmol, 1.3 equiv). Column chromatography afforded 91.2 mg (67 %) of **3ac** as a white amorphous

solid. Analytical data for **3ac**:  $R_f = 0.54$  (petroleum / ethyl acetate = 5:1);  $[\alpha]_D^{20} = -16.9$  (c 0.54, MeOH);  $^1\text{H NMR}$  (400 MHz,  $\text{CDCl}_3$ )  $\delta$  7.45–7.43 (m, 2H), 7.33–7.27 (m, 3H), 4.91 (s, 1H), 3.23 (s, 3H), 2.21 (q,  $J = 6.8$  Hz, 1H), 1.34 (d,  $J = 6.8$  Hz, 3H), 1.31 (s, 9H), 1.00–0.98 (m, 9H), 0.86–0.85 (m, 12H);  $^{13}\text{C NMR}$  (100 MHz,  $\text{CDCl}_3$ )  $\delta$  136.4, 131.5, 128.1, 127.9, 75.6, 65.1, 56.6, 53.9, 32.5, 22.8, 18.3, 18.0, 13.0, 11.6; HRMS (ESI-TOF)  $m/z$   $[\text{M} + \text{Na}]^+$  calcd for  $\text{C}_{24}\text{H}_{43}\text{NNaO}_3\text{SSi}$  476.2625, found 476.2621.

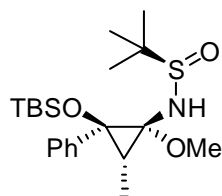

**(3ad)** The title compound was prepared using imidate **1a** (57.4 mg, 0.30 mmol, 1.0 equiv), NaHMDS (2.0 M in THF, 180  $\mu\text{L}$ , 0.36 mmol, 1.2 equiv) and acylsilane **2d** (86.0 mg, 0.39 mmol, 1.3 equiv). Column chromatography afforded 121.1 mg (98%) of **3ad** as a white solid. Analytical data for **3ad**: m.p. 62–64  $^\circ\text{C}$ ;  $R_f = 0.32$  (petroleum ether / ethyl acetate = 8:1);  $[\alpha]_D^{20} = -33.0$  (c 0.10, MeOH);  $^1\text{H NMR}$  (400 MHz,  $\text{CDCl}_3$ )  $\delta$  7.44–7.42 (m, 2H), 7.34–7.27 (m, 3H), 4.82 (s, 1H), 3.22 (s, 3H), 2.15 (q,  $J = 6.8$  Hz, 1H), 1.39 (d,  $J = 6.8$  Hz, 3H), 1.31 (s, 9H), 0.79 (s, 9H), 0.07 (s, 3H), -0.39 (s, 3H);  $^{13}\text{C NMR}$  (100 MHz,  $\text{CDCl}_3$ )  $\delta$  136.7, 131.1, 128.0, 127.9, 75.1, 64.7, 56.4, 53.8, 32.2, 25.8, 22.7, 18.0, 11.3, -4.0, -4.2; HRMS (ESI-TOF)  $m/z$   $[\text{M} + \text{Na}]^+$  calcd for  $\text{C}_{21}\text{H}_{37}\text{NNaO}_3\text{SSi}$  434.2156, found 434.2151.

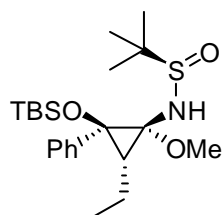

**(3b)** The title compound was prepared using imidate **1b** (61.6 mg, 0.30 mmol, 1.0 equiv), NaHMDS (2.0 M in THF, 180  $\mu\text{L}$ , 0.36 mmol, 1.2 equiv) and acylsilane **2d** (86.0 mg, 0.39 mmol, 1.3 equiv). Column chromatography afforded 127.6 mg (99%) of **3b** as a white solid. Analytical data for **3b**: m.p. 52–54  $^\circ\text{C}$ ;  $R_f = 0.51$  (petroleum ether / ethyl acetate = 8:1);  $[\alpha]_D^{20} = -38.0$  (c 0.10, MeOH);  $^1\text{H NMR}$  (400 MHz,  $\text{CDCl}_3$ )  $\delta$  7.48–7.45 (m, 2H), 7.31–7.24 (m, 3H), 4.68 (s, 1H), 3.14 (s, 3H), 2.03–1.93 (m, 2H), 1.74–1.62 (m, 1H), 1.29 (s, 9H), 1.20 (t,  $J = 6.8$  Hz, 3H), 0.81 (s, 9H), 0.09 (s, 3H), -0.39 (s, 3H);  $^{13}\text{C NMR}$  (100 MHz,  $\text{CDCl}_3$ )  $\delta$  137.4, 130.7, 127.8, 75.4, 64.9, 56.1, 52.9, 39.9, 25.8, 22.6, 19.8, 18.0, 15.0, -4.0, -4.1; HRMS (ESI-TOF)  $m/z$   $[\text{M} + \text{Na}]^+$  calcd for  $\text{C}_{22}\text{H}_{39}\text{NNaO}_3\text{SSi}$  448.2312, found 448.2316.

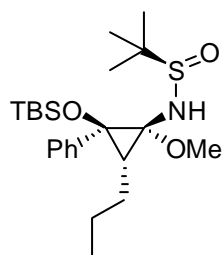

**(3c)** The title compound was prepared using imidate **1c** (65.8 mg, 0.30 mmol, 1.0 equiv), NaHMDS (2.0 M in THF, 180  $\mu\text{L}$ , 0.36 mmol, 1.2 equiv) and acylsilane **2d** (86.0 mg, 0.39 mmol, 1.3 equiv). Column chromatography afforded 128.0 mg (97%) of **3c** as a white solid. Analytical data for **3c**: m.p. 51–52  $^\circ\text{C}$ ;  $R_f = 0.62$  (petroleum ether / ethyl acetate = 8:1);  $[\alpha]_D^{20} = -46.0$  (c 0.10, MeOH);  $^1\text{H NMR}$  (400 MHz,  $\text{CDCl}_3$ )  $\delta$  7.48–7.46 (m, 2H), 7.32–7.24 (m, 3H), 4.68 (s, 1H), 3.13 (s, 3H), 2.08–2.04 (m, 1H), 1.94–1.85 (m, 1H), 1.70–1.60 (m, 3H), 1.29 (s, 9H), 1.01 (t,  $J = 7.2$  Hz, 3H), 0.82 (s, 9H), 0.09 (s, 3H), -0.38 (s, 3H);  $^{13}\text{C NMR}$  (100 MHz,  $\text{CDCl}_3$ )  $\delta$  137.5, 130.6, 127.79, 127.77, 75.4, 64.7, 56.1, 52.8, 38.2, 28.6, 25.9, 23.8, 22.7, 18.0, 14.3, -4.0, -4.1; HRMS (ESI-TOF)  $m/z$   $[\text{M} + \text{Na}]^+$  calcd for  $\text{C}_{23}\text{H}_{41}\text{NNaO}_3\text{SSi}$  462.2469, found 462.2465.

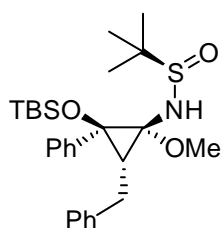

**(3d)** The title compound was prepared using imidate **1d** (80.2 mg, 0.30 mmol, 1.0 equiv), NaHMDS (2.0 M in THF, 180  $\mu$ L, 0.36 mmol, 1.2 equiv) and acylsilane **2d** (86.0 mg, 0.39 mmol, 1.3 equiv). Column chromatography afforded 122.8 mg (84%) of **3d** as a colorless oil. Analytical data for **3d**:  $R_f$  = 0.41 (petroleum ether / ethyl acetate = 8:1);  $[\alpha]_D^{20}$  = -55.0 (c 0.10, MeOH);  $^1\text{H NMR}$  (400 MHz,  $\text{CDCl}_3$ )  $\delta$  7.49 (dd,  $J$  = 8.0, 2.0 Hz, 2H), 7.41 (d,  $J$  = 7.6 Hz, 2H), 7.36–7.31 (m, 5H), 7.21 (t,  $J$  = 7.2 Hz, 1H), 4.79 (s, 1H), 3.23 (dd,  $J$  = 15.2, 5.6 Hz, 1H), 3.14 (s, 3H), 3.00 (dd,  $J$  = 15.2, 8.8 Hz, 1H), 2.53 (dd,  $J$  = 8.8, 5.6 Hz, 1H), 1.27 (s, 9H), 0.81 (s, 9H), 0.04 (s, 3H), -0.41 (s, 3H);  $^{13}\text{C NMR}$  (100 MHz,  $\text{CDCl}_3$ )  $\delta$  140.8, 136.7, 131.0, 128.6, 128.5, 128.03, 127.97, 126.1, 75.3, 65.2, 56.3, 53.5, 37.5, 32.0, 25.8, 22.6, 18.0, -3.9, -4.2; HRMS (ESI-TOF)  $m/z$   $[\text{M} + \text{Na}]^+$  calcd for  $\text{C}_{27}\text{H}_{41}\text{NNaO}_3\text{SSi}$  510.2469, found 510.2465.

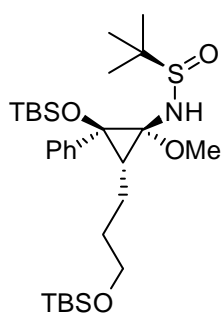

**(3e)** The title compound was prepared using imidate **1e** (104.9 mg, 0.30 mmol, 1.0 equiv), NaHMDS (2.0 M in THF, 180  $\mu$ L, 0.36 mmol, 1.2 equiv) and acylsilane **2d** (86.0 mg, 0.39 mmol, 1.3 equiv). Column chromatography afforded 164.2 mg (96%) of **3e** as a colorless oil. Analytical data for **3d**:  $R_f$  = 0.61 (petroleum ether / ethyl acetate = 5:1);  $[\alpha]_D^{20}$  = -37.0 (c 0.10, MeOH);  $^1\text{H NMR}$  (400 MHz,  $\text{CDCl}_3$ )  $\delta$  7.49–7.47 (m, 2H), 7.32–7.24 (m, 3H), 4.68 (s, 1H), 3.78–3.65 (m, 2H), 3.13 (s, 3H), 2.12–2.02 (m, 2H), 1.86–1.79 (m, 2H), 1.69–1.61 (m, 1H), 1.29 (s, 9H), 0.90 (s, 9H), 0.82 (s, 9H), 0.09 (s, 3H), 0.06 (s, 6H), -0.38 (s, 3H);  $^{13}\text{C NMR}$  (100 MHz,  $\text{CDCl}_3$ )  $\delta$  137.4, 130.7, 127.83, 127.80, 75.4, 64.8, 63.0, 56.2, 52.8, 37.9, 33.6, 26.2, 25.9, 22.74, 22.68, 18.5, 18.0, -3.9, -4.1, -5.1; HRMS (ESI-TOF)  $m/z$   $[\text{M} + \text{Na}]^+$  calcd for  $\text{C}_{29}\text{H}_{55}\text{NNaO}_4\text{SSi}_2$  592.3283, found 592.3289.

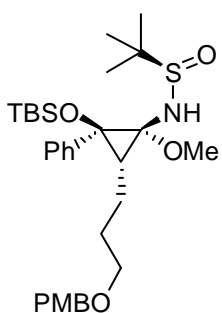

**(3f)** The title compound was prepared using imidate **1f** (106.6 mg, 0.30 mmol, 1.0 equiv), NaHMDS (2.0 M in THF, 180  $\mu$ L, 0.36 mmol, 1.2 equiv) and acylsilane **2d** (86.0 mg, 0.39 mmol, 1.3 equiv). Column chromatography afforded 150.3 mg (87%) of **3f** as a colorless oil. Analytical data for **3f**:  $R_f$  = 0.32 (petroleum ether / ethyl acetate = 5:1);  $[\alpha]_D^{20}$  = -40.0 (c 0.10, MeOH);  $^1\text{H NMR}$  (400 MHz,  $\text{CDCl}_3$ )  $\delta$  7.49–7.46 (m, 2H), 7.32–7.28 (m, 5H), 6.89–6.85 (m, 2H), 4.68 (s, 1H), 4.46 (s, 2H), 3.80 (s, 3H), 3.61–3.52 (m, 2H), 3.14 (s, 3H), 2.15–2.04 (m, 2H), 1.98–1.86 (m, 2H), 1.73–1.65 (m, 1H), 1.30 (s, 9H), 0.82 (s, 9H), 0.08 (s, 3H), -0.39 (s, 3H);  $^{13}\text{C NMR}$  (100 MHz,  $\text{CDCl}_3$ )  $\delta$  159.2, 137.3, 131.1, 130.8, 129.4, 127.9, 113.9, 110.2, 75.3, 72.6, 69.9, 64.8, 56.2, 55.4, 52.8, 37.8, 30.5, 25.9, 23.1, 22.7, 18.0, -3.9, -4.1; HRMS (ESI-TOF)  $m/z$   $[\text{M} + \text{Na}]^+$  calcd for  $\text{C}_{31}\text{H}_{49}\text{NNaO}_5\text{SSi}$  598.2993, found 598.2988.

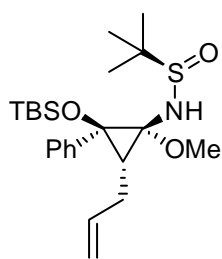

**(3g)** The title compound was prepared using imidate **1g** (65.2 mg, 0.30 mmol, 1.0 equiv), NaHMDS (2.0 M in THF, 180  $\mu$ L, 0.36 mmol, 1.2 equiv) and acylsilane **2d** (86.0 mg, 0.39 mmol, 1.3 equiv). Column chromatography afforded 111.7 mg (85%) of **3g** as a white solid. Analytical data for **3g**: m.p. 56–57  $^{\circ}$ C;  $R_f$  = 0.32 (petroleum ether / ethyl acetate = 8:1);  $[\alpha]_D^{20}$  = -50.0 (c 0.10, MeOH);  $^1\text{H NMR}$  (400 MHz,  $\text{CDCl}_3$ )  $\delta$  7.48–7.45 (m, 2H), 7.34–7.28 (m, 3H), 6.05 (m, 1H), 5.26 (dd,  $J$  = 17.2, 1.6 Hz, 1H), 5.13 (dd,  $J$  = 10.4, 1.6 Hz, 1H), 4.77 (s, 1H), 3.19 (s, 9H), 2.67–2.60 (m, 1H), 2.46–2.38 (m, 1H), 2.17 (dd,  $J$  = 8.8, 6.0 Hz, 1H), 1.31 (s, 9H), 0.81 (s, 9H), 0.08 (s, 3H), -0.39 (s, 3H);  $^{13}\text{C NMR}$  (100 MHz,  $\text{CDCl}_3$ )  $\delta$  137.7, 136.7, 130.9, 128.03, 127.96, 115.9, 77.4, 75.1, 64.9, 56.4, 53.5, 36.7, 30.5, 25.8, 22.7, 18.0, -3.9, -4.1; HRMS (ESI-TOF)  $m/z$   $[\text{M} + \text{Na}]^+$  calcd for  $\text{C}_{23}\text{H}_{39}\text{NNaO}_3\text{SSi}$  460.2312, found 460.2305.

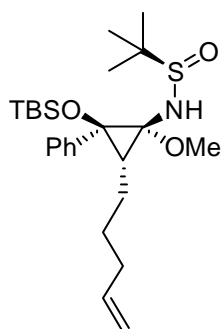

**(3h)** The title compound was prepared using imidate **1h** (73.6 mg, 0.30 mmol, 1.0 equiv), NaHMDS (2.0 M in THF, 180  $\mu$ L, 0.36 mmol, 1.2 equiv) and acylsilane **2d** (86.0 mg, 0.39 mmol, 1.3 equiv). Column chromatography afforded 123.0 mg (88%) of **3h** as a white solid. Analytical data for **3h**: m.p. 84–86  $^{\circ}$ C;  $R_f$  = 0.60 (petroleum ether / ethyl acetate = 8:1);  $[\alpha]_D^{20}$  = -43.0 (c 0.10, MeOH);  $^1\text{H NMR}$  (400 MHz,  $\text{CDCl}_3$ )  $\delta$  7.48–7.45 (m, 2H), 7.33–7.27 (m, 3H), 5.91–5.81 (m, 1H), 5.05–5.02 (m, 1H), 4.98–4.94 (m, 1H), 4.68 (s, 1H), 3.14 (s, 3H), 2.21–2.16 (m, 2H), 2.07–2.03 (m, 1H), 1.99–1.92 (m, 1H), 1.75–1.62 (m, 3H), 1.30 (s, 9H), 0.82 (s, 9H), 0.09 (s, 3H), -0.39 (s, 3H);  $^{13}\text{C NMR}$  (100 MHz,  $\text{CDCl}_3$ )  $\delta$  138.9, 137.4, 130.7, 127.9, 114.7, 75.4, 64.8, 56.2, 52.8, 38.0, 33.9, 29.9, 29.7, 25.9, 22.7, 18.0, -4.0, -4.1; HRMS (ESI-TOF)  $m/z$   $[\text{M} + \text{Na}]^+$  calcd for  $\text{C}_{25}\text{H}_{43}\text{NNaO}_3\text{SSi}$  488.2625, found 488.2619.

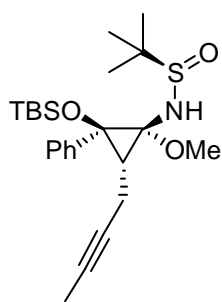

**(3i)** The title compound was prepared using imidate **1i** (68.8 mg, 0.30 mmol, 1.0 equiv), NaHMDS (2.0 M in THF, 180  $\mu$ L, 0.36 mmol, 1.2 equiv) and acylsilane **2d** (86.0 mg, 0.39 mmol, 1.3 equiv). Column chromatography afforded 113.1 mg (84%) of **3i** as a white solid. Analytical data for **4i**: m.p. 76–78  $^{\circ}$ C;  $R_f$  = 0.26 (petroleum ether / ethyl acetate = 8:1);  $[\alpha]_D^{20}$  = -108.0 (c 0.10, MeOH);  $^1\text{H NMR}$  (400 MHz,  $\text{CDCl}_3$ )  $\delta$  7.62–7.59 (m, 2H), 7.36–7.28 (m, 3H), 4.76 (s, 1H), 3.20 (s, 3H), 2.69–2.62 (m, 1H), 2.42–2.33 (m, 1H), 2.30 (dd,  $J$  = 10.0, 4.4 Hz, 1H), 1.85 (t,  $J$  = 2.4 Hz, 3H), 1.31 (s, 9H), 0.80 (s, 9H), 0.17 (s, 3H), -0.38 (s, 3H);  $^{13}\text{C NMR}$  (100 MHz,  $\text{CDCl}_3$ )  $\delta$  136.3, 131.0, 128.2, 128.1, 78.3, 77.7, 74.6, 65.1, 56.5, 53.5, 36.4, 25.8, 22.7, 18.0, 16.7, 3.7, -4.2, -4.3; HRMS (ESI-TOF)  $m/z$   $[\text{M} + \text{Na}]^+$  calcd for  $\text{C}_{24}\text{H}_{39}\text{NNaO}_3\text{SSi}$  472.2312, found 472.2314.

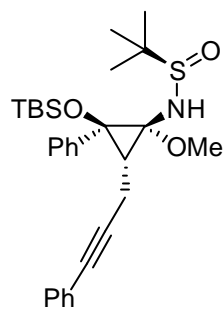

**(3j)** The title compound was prepared using imidate **1j** (87.4 mg, 0.30 mmol, 1.0 equiv), NaHMDS (2.0 M in THF, 180  $\mu$ L, 0.36 mmol, 1.2 equiv) and acylsilane **2d** (86.0 mg, 0.39 mmol, 1.3 equiv). Column chromatography afforded 130.2 mg (85%) of **3j** as a colorless oil. Analytical data for **3j**:  $R_f$  = 0.47 (petroleum ether / ethyl acetate = 5:1);  $[\alpha]_D^{20}$  = -112.0 (c 0.10, MeOH);  $^1\text{H}$  NMR (400 MHz,  $\text{CDCl}_3$ )  $\delta$  7.68–7.66 (m, 2H), 7.48–7.45 (m, 2H), 7.37–7.30 (m, 6H), 4.80 (s, 1H), 3.24 (s, 3H), 2.97 (dd,  $J$  = 17.6, 4.8 Hz, 1H), 2.65 (dd,  $J$  = 17.6, 10.0 Hz, 1H), 2.44 (dd,  $J$  = 10.4, 4.8 Hz, 1H), 1.32 (s, 9H), 0.81 (s, 9H), 0.21 (s, 3H), -0.38 (s, 3H);  $^{13}\text{C}$  NMR (100 MHz,  $\text{CDCl}_3$ )  $\delta$  136.1, 131.7, 131.0, 128.4, 128.3, 128.2, 127.8, 124.0, 89.2, 82.5, 74.6, 65.2, 56.5, 53.5, 35.8, 25.8, 22.7, 18.0, 17.4, -4.0, -4.2; HRMS (ESI-TOF)  $m/z$   $[\text{M} + \text{Na}]^+$  calcd for  $\text{C}_{29}\text{H}_{41}\text{NNaO}_3\text{SSi}$  534.2469, found 534.2461.

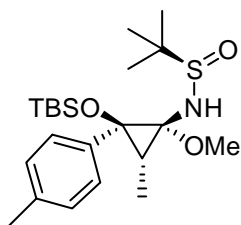

**(3k)** The title compound was prepared using imidate **1a** (57.4 mg, 0.30 mmol, 1.0 equiv), NaHMDS (2.0 M in THF, 180  $\mu$ L, 0.36 mmol, 1.2 equiv) and acylsilane **2e** (91.4 mg, 0.39 mmol, 1.3 equiv). Column chromatography afforded 119.8 mg (94%) of **3k** as a white amorphous solid. Analytical data for **3k**:  $R_f$  = 0.30 (petroleum ether / ethyl acetate = 8:1);  $[\alpha]_D^{20}$  = -31.0 (c 0.10, MeOH);  $^1\text{H}$  NMR (400 MHz,  $\text{CDCl}_3$ )  $\delta$  7.31 (d,  $J$  = 8.4 Hz, 2H), 7.12 (d,  $J$  = 7.6 Hz, 2H), 4.82 (s, 1H), 3.23 (s, 3H), 2.34 (s, 3H), 2.12 (q,  $J$  = 6.8 Hz, 1H), 1.37 (d,  $J$  = 6.8 Hz, 3H), 1.30 (s, 9H), 0.80 (s, 9H), 0.07 (s, 3H), -0.39 (s, 3H);  $^{13}\text{C}$  NMR (100 MHz,  $\text{CDCl}_3$ )  $\delta$  137.6, 133.6, 131.0, 128.7, 75.2, 64.5, 56.4, 53.8, 32.1, 25.9, 22.7, 21.4, 18.0, 11.3, -4.0, -4.1; HRMS (ESI-TOF)  $m/z$   $[\text{M} + \text{Na}]^+$  calcd for  $\text{C}_{22}\text{H}_{39}\text{NNaO}_3\text{SSi}$  448.2312, found 448.2307.

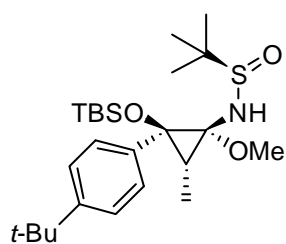

**(3l)** The title compound was prepared using imidate **1a** (57.4 mg, 0.30 mmol, 1.0 equiv), NaHMDS (2.0 M in THF, 180  $\mu$ L, 0.36 mmol, 1.2 equiv) and acylsilane **2f** (107.8 mg, 0.39 mmol, 1.3 equiv). Column chromatography afforded 126.1 mg (90%) of **3l** as a white solid. Analytical data for **3l**: m.p. 134–136  $^\circ\text{C}$ ;  $R_f$  = 0.29 (petroleum ether / ethyl acetate = 8:1);  $[\alpha]_D^{20}$  = -29.0 (c 0.10, MeOH);  $^1\text{H}$  NMR (400 MHz,  $\text{CDCl}_3$ )  $\delta$  7.35–7.30 (m, 4H), 4.82 (s, 1H), 3.24 (s, 3H), 2.12 (q,  $J$  = 6.8 Hz, 1H), 1.38 (d,  $J$  = 6.8 Hz, 3H), 1.31 (s, 9H), 0.78 (s, 9H), 0.05 (s, 3H), -0.43 (s, 3H);  $^{13}\text{C}$  NMR (100 MHz,  $\text{CDCl}_3$ )  $\delta$  150.9, 133.5, 130.8, 124.9, 75.2, 64.5, 56.4, 53.8, 34.7, 32.1, 31.5, 25.8, 22.7, 18.0, 11.3, -4.1, -4.3; HRMS (ESI-TOF)  $m/z$   $[\text{M} + \text{Na}]^+$  calcd for  $\text{C}_{25}\text{H}_{45}\text{NNaO}_3\text{SSi}$  490.2782, found 490.2786.

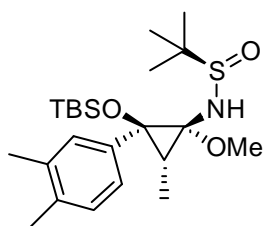

**(3m)** The title compound was prepared using imidate **1a** (57.4 mg, 0.30 mmol, 1.0 equiv), NaHMDS (2.0 M in THF, 180  $\mu$ L, 0.36 mmol, 1.2 equiv) and acylsilane **2g** (96.9 mg, 0.39 mmol, 1.3 equiv). Column chromatography afforded 127.8 mg (97%) of **3m** as a white solid. Analytical data for **3m**: m.p. 68–70  $^\circ\text{C}$ ;  $R_f$  = 0.31 (petroleum ether / ethyl

acetate = 8:1);  $[\alpha]_D^{20} = -34.0$  (c 0.10, MeOH);  $^1\text{H NMR}$  (400 MHz,  $\text{CDCl}_3$ )  $\delta$  7.19 (d,  $J = 1.6$  Hz, 1H), 7.14 (dd,  $J = 8.0, 1.6$  Hz, 1H), 7.06 (d,  $J = 7.6$  Hz, 1H), 4.82 (s, 1H), 3.23 (s, 3H), 2.25 (s, 3H), 2.24 (s, 3H), 2.11 (q,  $J = 6.8$  Hz, 1H), 1.38 (d,  $J = 6.8$  Hz, 3H), 1.31 (s, 9H), 0.80 (s, 9H), 0.06 (s, 3H), -0.40 (s, 3H);  $^{13}\text{C NMR}$  (100 MHz,  $\text{CDCl}_3$ )  $\delta$  136.2, 136.0, 133.9, 132.4, 129.2, 128.5, 75.2, 64.5, 56.4, 32.1, 25.9, 22.7, 19.9, 19.7, 18.0, 11.3, -4.0, -4.1; HRMS (ESI-TOF)  $m/z$   $[\text{M} + \text{Na}]^+$  calcd for  $\text{C}_{23}\text{H}_{41}\text{NNaO}_3\text{SSi}$  462.2469, found 462.2461.

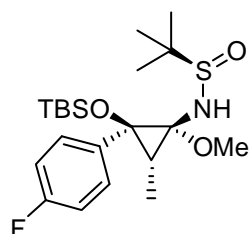

**(3n)** The title compound was prepared using imidate **1a** (57.4 mg, 0.30 mmol, 1.0 equiv), NaHMDS (2.0 M in THF, 180  $\mu\text{L}$ , 0.36 mmol, 1.2 equiv) and acylsilane **2h** (93.0 mg, 0.39 mmol, 1.3 equiv). Column chromatography afforded 128.7 mg (99%) of **3n** as a white solid. Analytical data for **3n**: m.p. 49–51  $^\circ\text{C}$ ;  $R_f = 0.18$  (petroleum ether / ethyl acetate = 8:1);  $[\alpha]_D^{20} = -33.0$  (c 0.10, MeOH);  $^1\text{H NMR}$  (400 MHz,

$\text{CDCl}_3$ )  $\delta$  7.41–7.37 (m, 2H), 7.05–6.98 (m, 2H), 4.81 (s, 1H), 3.22 (s, 3H), 2.15 (q,  $J = 6.8$  Hz, 1H), 1.36 (d,  $J = 6.8$  Hz, 3H), 1.31 (s, 9H), 0.79 (s, 9H), 0.07 (s, 3H), -0.35 (s, 3H);  $^{13}\text{C NMR}$  (100 MHz,  $\text{CDCl}_3$ )  $\delta$  162.4 (d,  $J = 245.5$  Hz), 132.8 (d,  $J = 8.1$  Hz), 132.66 (d,  $J = 3.3$  Hz), 115.0 (d,  $J = 21.0$  Hz), 75.0, 64.1, 56.5, 53.9, 32.2, 25.8, 22.7, 18.0, 11.3, -3.9, -4.0; HRMS (ESI-TOF)  $m/z$   $[\text{M} + \text{Na}]^+$  calcd for  $\text{C}_{21}\text{H}_{37}\text{FNNaO}_3\text{SSi}$  452.2061, found 452.2068.

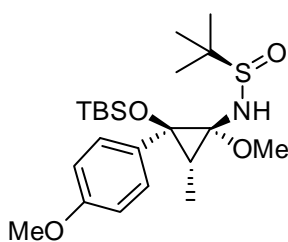

**(3o)** The title compound was prepared using imidate **1a** (57.4 mg, 0.30 mmol, 1.0 equiv), NaHMDS (2.0 M in THF, 180  $\mu\text{L}$ , 0.36 mmol, 1.2 equiv) and acylsilane **2i** (97.7 mg, 0.39 mmol, 1.3 equiv). Column chromatography afforded 131.2 mg (99%) of **3o** as a white solid. Analytical data for **3o**: m.p. 95–97  $^\circ\text{C}$ ;  $R_f = 0.32$  (petroleum ether / ethyl acetate = 5:1);  $[\alpha]_D^{20} = -26.0$  (c 0.10, MeOH);  $^1\text{H NMR}$  (400

MHz,  $\text{CDCl}_3$ )  $\delta$  7.36–7.32 (m, 2H), 6.87–6.83 (m, 2H), 4.82 (s, 1H), 3.81 (s, 3H), 3.24 (s, 3H), 2.11 (q,  $J = 6.8$  Hz, 1H), 1.36 (d,  $J = 6.8$  Hz, 3H), 1.30 (s, 9H), 0.80 (s, 9H), 0.07 (s, 3H), -0.37 (s, 3H);  $^{13}\text{C NMR}$  (100 MHz,  $\text{CDCl}_3$ )  $\delta$  159.2, 132.4, 128.8, 113.4, 75.2, 64.3, 56.4, 55.3, 53.9, 32.2, 25.9, 22.7, 18.0, 11.4, -4.02, -4.04; HRMS (ESI-TOF)  $m/z$   $[\text{M} + \text{Na}]^+$  calcd for  $\text{C}_{22}\text{H}_{39}\text{NNaO}_4\text{SSi}$  464.2261, found 464.2268.

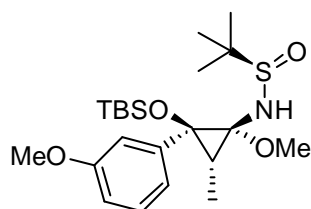

**(3p + 3p')** The title compound was prepared using imidate **1a** (57.4 mg, 0.30 mmol, 1.0 equiv), NaHMDS (2.0 M in THF, 180  $\mu\text{L}$ , 0.36 mmol, 1.2 equiv) and acylsilane **2j** (97.7 mg, 0.39 mmol, 1.3 equiv). Column chromatography afforded 107.3 mg (81%) of **3p** as a white solid and 21.2 mg (16%) of **3p'** as a white solid. Analytical

data for **3p** (major diastereoisomer): m.p. 66–68  $^\circ\text{C}$ ;  $R_f = 0.27$  (petroleum ether / ethyl acetate = 5:1);  $[\alpha]_D^{20} = -32.0$  (c 0.10, MeOH);  $^1\text{H NMR}$  (400 MHz,  $\text{CDCl}_3$ )  $\delta$  7.23 (d,  $J = 8.0$  Hz, 1H), 7.03 (d,  $J = 7.6$  Hz, 1H), 6.99 (t,  $J = 2.0$  Hz, 1H), 6.83 (dd,  $J = 8.0, 2.4$  Hz, 1H), 4.79 (s, 1H), 3.81 (s, 3H), 3.22 (s, 3H), 2.13 (q,  $J = 6.8$  Hz, 1H), 1.41 (d,  $J = 6.8$  Hz, 3H), 1.31 (s, 9H), 0.81 (s, 9H), 0.08 (s, 3H), -0.34 (s, 3H);  $^{13}\text{C NMR}$  (100 MHz,  $\text{CDCl}_3$ )  $\delta$  159.2, 138.2, 128.9, 123.6, 117.0,



113.2, 75.2, 64.5, 56.5, 55.4, 53.7, 32.3, 25.9, 22.7, 18.0, 11.2, -4.0, -4.1; HRMS (ESI-TOF)  $m/z$   $[M + Na]^+$  calcd for  $C_{22}H_{39}NNaO_4SSi$  464.2261, found 464.2265. Analytical data for **3p'** (minor diastereoisomer): m.p. 70–71 °C;  $R_f$  = 0.29 (petroleum ether / ethyl acetate = 3:1);  $[\alpha]_D^{20}$  = -24.0 (c 0.05, MeOH);  $^1H$  NMR (400 MHz,  $CDCl_3$ )  $\delta$  7.28 (t,  $J$  = 7.6 Hz, 1H), 6.92 (d,  $J$  = 7.6 Hz, 1H), 6.87 (t,  $J$  = 2.0 Hz, 1H), 6.83 (dd,  $J$  = 8.0, 2.4 Hz, 1H), 3.81 (s, 3H), 3.55 (s, 3H), 3.31 (s, 1H), 2.11 (q,  $J$  = 6.4 Hz, 1H), 1.28 (d,  $J$  = 7.2 Hz, 3H), 1.01 (s, 9H), 0.86 (s, 9H), 0.02 (s, 3H), -0.47 (s, 3H);  $^{13}C$  NMR (100 MHz,  $CDCl_3$ )  $\delta$  160.1, 139.4, 130.1, 122.1, 115.6, 113.9, 74.1, 67.6, 55.7, 55.5, 54.0, 27.4, 26.1, 22.3, 18.5, 7.6, -3.4, -3.6; HRMS (ESI-TOF)  $m/z$   $[M + Na]^+$  calcd for  $C_{22}H_{39}NNaO_4SSi$  464.2261, found 464.2256.

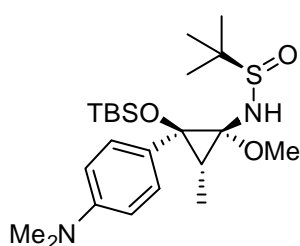

**(3q)** The title compound was prepared using imidate **1a** (57.4 mg, 0.30 mmol, 1.0 equiv), NaHMDS (2.0 M in THF, 180  $\mu$ L, 0.36 mmol, 1.2 equiv) and acylsilane **2k** (102.7 mg, 0.39 mmol, 1.3 equiv). Column chromatography afforded 65.5 mg (48%) of **3q** as a white solid. Analytical data for **3q**: m.p. 68–70 °C;  $R_f$  = 0.39 (petroleum ether / ethyl acetate = 5:1);  $[\alpha]_D^{20}$  = -13.0 (c 0.10, MeOH);  $^1H$  NMR (400 MHz,  $CDCl_3$ )  $\delta$  7.26 (d,  $J$  = 8.4 Hz, 2H), 6.65 (d,  $J$  = 8.8, 2H), 4.83 (s, 1H), 3.25 (s, 3H), 2.95 (s, 6H), 2.07 (q,  $J$  = 6.8 Hz, 1H), 1.36 (d,  $J$  = 6.8 Hz, 3H), 1.30 (s, 9H), 0.81 (s, 9H), 0.06 (s, 3H), -0.38 (s, 3H);  $^{13}C$  NMR (100 MHz,  $CDCl_3$ )  $\delta$  150.0, 132.1, 123.9, 111.7, 75.3, 64.5, 56.4, 53.9, 40.5, 32.1, 25.9, 22.8, 18.0, 11.4, -4.0, -4.1; HRMS (ESI-TOF)  $m/z$   $[M + Na]^+$  calcd for  $C_{23}H_{43}N_2O_3SSi$  455.2758, found 455.2762.

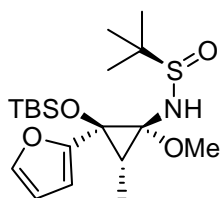

**(3r)** The title compound was prepared using imidate **1a** (57.4 mg, 0.30 mmol, 1.0 equiv), NaHMDS (2.0 M in THF, 180  $\mu$ L, 0.36 mmol, 1.2 equiv) and acylsilane **2l** (82.0 mg, 0.39 mmol, 1.3 equiv). Column chromatography afforded 120.3 mg (99%) of **3r** as a light yellow oil. Analytical data for **3r**:  $R_f$  = 0.48 (petroleum ether / ethyl acetate = 5:1);  $[\alpha]_D^{20}$  = -2.0 (c 0.10, MeOH);  $^1H$  NMR (400 MHz,  $CDCl_3$ )  $\delta$  7.42–7.41 (m, 1H), 6.37–6.34 (m, 2H), 4.86 (s, 1H), 3.21 (s, 3H), 2.07 (q,  $J$  = 6.8 Hz, 1H), 1.33 (d,  $J$  = 6.4 Hz, 3H), 1.28 (s, 9H), 0.85 (s, 9H), 0.08 (s, 3H), -0.25 (3H);  $^{13}C$  NMR (100 MHz,  $CDCl_3$ )  $\delta$  150.0, 141.8, 111.1, 110.6, 75.6, 59.0, 56.3, 53.6, 33.0, 25.8, 22.6, 17.9, 10.0, -4.6, -4.9; HRMS (ESI-TOF)  $m/z$   $[M + Na]^+$  calcd for  $C_{19}H_{35}NNaO_4SSi$  424.1948, found 424.1955.

### Procedure for 1-gram scale preparation of **3ad**

A solution of *N*-tert-butanesulfonylimidate **1a** (956.5 mg, 5.0 mmol, 1.0 equiv) in 50 mL THF was added to a flame-dried schlenk flask equipped with a magnetic stirring bar and purged with argon. The solution was cooled to -78 °C. Then, NaHMDS (2.0 M in THF, 3.0 mL, 6.0 mmol, 1.2 equiv) was added dropwise to the solution by syringe. After the reaction mixture was stirred for 30 min at -78 °C, the solution of acylsilane **2d** (1432.5 mg, 6.5 mmol, 1.3 equiv) in 20 mL THF was added to the reaction mixture via syringe. The reaction mixture was stirred for 1 h at -78 °C. Then,

the reaction was quenched with 10.0 mL saturated aqueous ammonium chloride and extracted with ethyl acetate (50 mL x 3). The combined organic layers were washed with brine, dried over Na<sub>2</sub>SO<sub>4</sub>, filtered, and concentrated under vacuum. The residue was purified by flash column chromatography on silica gel.

#### 4. Procedure for preparation of product 5

To a solution of *N-tert*-butanesulfinylimidate (0.30 mmol, 1.0 equiv) and acylsilane (0.39 mmol, 1.3 equiv) in 4.0 mL toluene was added *t*-BuOK (1.0 M in THF, 360 μL, 0.36 mmol, 1.2 equiv) at -78 °C. After the reaction mixture was stirred for 60 min at -78 °C, the reaction was quenched with saturated aqueous ammonium chloride and extracted with ethyl acetate (3 times). The combined organic layers were washed with brine, dried over Na<sub>2</sub>SO<sub>4</sub>, filtered, and concentrated under vacuum. The residue was purified by flash column chromatography on silica gel.

#### Analytical data for β-silyloxy imidates 5

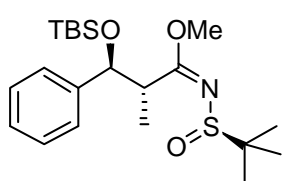

(**5a**) The title compound was prepared using imidate **1a** (57.4 mg, 0.30 mmol, 1.0 equiv), *t*-BuOK (1.0 M in THF, 360 μL, 0.36 mmol, 1.2 equiv) and acylsilane **2d** (86.0 mg, 0.39 mmol, 1.3 equiv). Column chromatography afforded 116.2 mg (94%) of **5a** as a white solid. Analytical data for **5a**: m.p. 78–80 °C; *R*<sub>f</sub> = 0.33 (petroleum ether / ethyl acetate = 10:1); [α]<sub>D</sub><sup>20</sup> = -105.0 (c 0.20, MeOH); <sup>1</sup>H NMR (400 MHz, CDCl<sub>3</sub>) δ 7.37–7.24 (m, 5H), 4.71 (d, *J* = 9.6 Hz, 1H), 3.79 (s, 3H), 3.71–3.63 (m, 1H), 1.20 (s, 9H), 0.82 (d, *J* = 7.2 Hz, 3H), 0.81 (s, 9H), -0.04 (s, 3H), -0.35 (s, 3H); <sup>13</sup>C NMR (100 MHz, CDCl<sub>3</sub>) δ 176.1, 142.6, 128.3, 128.0, 127.5, 55.9, 54.1, 46.3, 25.8, 22.2, 18.1, 14.2, -4.5, -5.1; HRMS (ESI-TOF) *m/z* [M + Na]<sup>+</sup> calcd for C<sub>21</sub>H<sub>37</sub>NNaO<sub>3</sub>SSi 434.2156, found 434.2151.

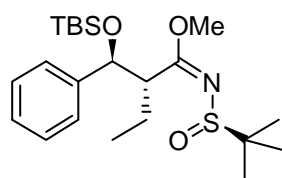

(**5b**) The title compound was prepared using imidate **1b** (61.6 mg, 0.30 mmol, 1.0 equiv), *t*-BuOK (1.0 M in THF, 360 μL, 0.36 mmol, 1.2 equiv) and acylsilane **2d** (86.0 mg, 0.39 mmol, 1.3 equiv). Column chromatography afforded 108.4 mg (85%) of **5b** as a colorless oil. Analytical data for **5b**: *R*<sub>f</sub> = 0.33 (petroleum ether / ethyl acetate = 10:1); [α]<sub>D</sub><sup>20</sup> = -119.0 (c 0.10, MeOH); <sup>1</sup>H NMR (400 MHz, CDCl<sub>3</sub>) δ 7.36–7.23 (m, 5H), 4.70 (d, *J* = 9.2 Hz, 1H), 3.76 (s, 3H), 3.73–3.70 (m, 1H), 1.45–1.36 (m, 1H), 1.23 (s, 9H), 1.15–1.00 (m, 3H), 0.79 (s, 9H), 0.74 (t, *J* = 7.2 Hz, 3H), -0.06 (s, 3H), -0.35 (s, 3H); <sup>13</sup>C NMR (100 MHz, CDCl<sub>3</sub>) δ 175.9, 143.1, 128.2, 127.9, 127.6, 76.9, 56.0, 53.8, 51.9, 31.3, 25.8, 22.4, 20.7, 18.1, 14.3, -4.6, -5.1; HRMS (ESI-TOF) *m/z* [M + Na]<sup>+</sup> calcd for C<sub>22</sub>H<sub>39</sub>NNaO<sub>3</sub>SSi 448.2312, found 448.2319.

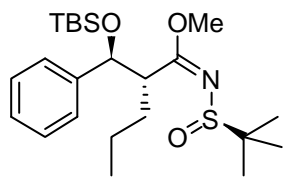

**(5c)** The title compound was prepared using imidate **1c** (65.8 mg, 0.30 mmol, 1.0 equiv), *t*-BuOK (1.0 M in THF, 360  $\mu$ L, 0.36 mmol, 1.2 equiv) and acylsilane **2d** (86.0 mg, 0.39 mmol, 1.3 equiv). Column chromatography afforded 126.6 mg (96%) of **5c** as a colorless oil. Analytical data for **5c**:  $R_f$  = 0.57 (petroleum ether / ethyl acetate = 10:1);  $[\alpha]_D^{20}$  = -138.0 (c 0.10, MeOH);  $^1\text{H NMR}$  (400 MHz,  $\text{CDCl}_3$ )  $\delta$  7.36–7.23 (m, 5H), 4.70 (d,  $J$  = 9.2 Hz, 1H), 3.75 (s, 3H), 3.73–3.70 (m, 1H), 1.45–1.36 (m, 1H), 1.23 (s, 9H), 1.14–1.02 (m, 3H), 0.79 (s, 9H), 0.73 (t,  $J$  = 7.2 Hz, 3H), -0.06 (s, 3H), -0.35 (s, 3H);  $^{13}\text{C NMR}$  (100 MHz,  $\text{CDCl}_3$ )  $\delta$  175.9, 143.1, 128.2, 127.9, 127.6, 76.9, 56.0, 53.8, 51.9, 31.3, 25.8, 22.4, 20.7, 18.1, 14.3, -4.6, -5.1; HRMS (ESI-TOF)  $m/z$   $[\text{M} + \text{Na}]^+$  calcd for  $\text{C}_{23}\text{H}_{41}\text{NNaO}_3\text{SSi}$  462.2469, found 462.2466.

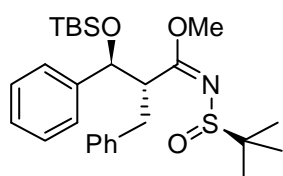

**(5d)** The title compound was prepared using imidate **1d** (80.2 mg, 0.30 mmol, 1.0 equiv), *t*-BuOK (1.0 M in THF, 360  $\mu$ L, 0.36 mmol, 1.2 equiv) and acylsilane **2d** (86.0 mg, 0.39 mmol, 1.3 equiv). Column chromatography afforded 145.9 mg (99%) of **5d** as a colorless oil. Analytical data for **5d**:  $R_f$  = 0.20 (petroleum ether / ethyl acetate = 10:1);  $[\alpha]_D^{20}$  = -102.0 (c 0.20, MeOH);  $^1\text{H NMR}$  (400 MHz,  $\text{CDCl}_3$ )  $\delta$  7.43 (d,  $J$  = 7.2 Hz, 2H), 7.37–7.28 (m, 3H), 7.17–7.07 (m, 3H), 6.99–6.93 (m, 2H), 4.85 (d,  $J$  = 8.8 Hz, 1H), 4.02–3.96 (m, 1H), 3.72 (s, 3H), 2.72–2.66 (m, 1H), 2.49 (dd,  $J$  = 13.2, 4.0 Hz, 1H), 0.89 (s, 9H), 0.82 (s, 9H), -0.01 (s, 3H), -0.27 (s, 3H);  $^{13}\text{C NMR}$  (100 MHz,  $\text{CDCl}_3$ )  $\delta$  174.4, 142.8, 138.7, 129.1, 128.5, 128.4, 128.1, 127.6, 126.5, 76.8, 55.4, 54.3, 53.6, 35.0, 25.8, 21.9, 18.2, -4.6, -5.0; HRMS (ESI-TOF)  $m/z$   $[\text{M} + \text{Na}]^+$  calcd for  $\text{C}_{27}\text{H}_{41}\text{NNaO}_3\text{SSi}$  510.2469, found 510.2461.

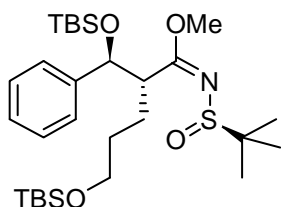

**(5e)** The title compound was prepared using imidate **1e** (104.9 mg, 0.30 mmol, 1.0 equiv), *t*-BuOK (1.0 M in THF, 360  $\mu$ L, 0.36 mmol, 1.2 equiv) and acylsilane **2d** (86.0 mg, 0.39 mmol, 1.3 equiv). Column chromatography afforded 155.5 mg (91%) of **5e** as a colorless oil. Analytical data for **5e**:  $R_f$  = 0.38 (petroleum ether / ethyl acetate = 10:1);  $[\alpha]_D^{20}$  = -95.0 (c 0.20, MeOH);  $^1\text{H NMR}$  (400 MHz,  $\text{CDCl}_3$ )  $\delta$  7.35–7.22 (m, 5H), 4.72 (d,  $J$  = 8.8 Hz, 1H), 3.76 (s, 3H), 3.73–3.65 (m, 1H), 3.46–3.37 (m, 2H), 1.61–1.59 (m, 1H), 1.49–1.39 (m, 1H), 1.33–1.27 (m, 1H), 1.23 (s, 9H), 1.19–1.13 (m, 1H), 0.80 (s, 18H), -0.05 (s, 3H), -0.06 (s, 6H), -0.34 (s, 3H);  $^{13}\text{C NMR}$  (100 MHz,  $\text{CDCl}_3$ )  $\delta$  175.8, 143.0, 128.3, 127.9, 127.6, 76.8, 62.9, 56.1, 53.9, 51.8, 30.8, 26.0, 25.8, 25.5, 22.4, 18.4, 18.1, -4.5, -5.1, -5.2; HRMS (ESI-TOF)  $m/z$   $[\text{M} + \text{Na}]^+$  calcd for  $\text{C}_{29}\text{H}_{55}\text{NNaO}_4\text{SSi}_2$  592.3283, found 592.3281.

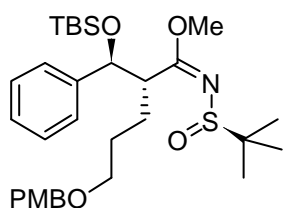

**(5f)** The title compound was prepared using imidate **1f** (106.6 mg, 0.30 mmol, 1.0 equiv), *t*-BuOK (1.0 M in THF, 360  $\mu$ L, 0.36 mmol, 1.2 equiv) and acylsilane **2d** (86.0 mg, 0.39 mmol, 1.3 equiv). Column chromatography afforded 155.2 mg (90%) of **5f** as a colorless oil. Analytical data for **5f**:  $R_f$  = 0.19 (petroleum ether / ethyl acetate =

10:1);  $[\alpha]_D^{20} = -89.0$  (c 0.20, MeOH);  $^1\text{H NMR}$  (400 MHz,  $\text{CDCl}_3$ )  $\delta$  7.34–7.22 (m, 5H), 7.12 (d,  $J = 8.8$  Hz, 2H), 6.82 (d,  $J = 8.4$  Hz, 2H), 4.71 (d,  $J = 9.2$  Hz, 1H), 4.28 (s, 2H), 3.78 (s, 3H), 3.76–3.71 (m, 4H), 3.29–3.19 (m, 1H), 1.53–1.30 (m, 3H), 1.26–1.13 (m, 10H), 0.78 (s, 9H), -0.07 (s, 3H), -0.36 (s, 3H);  $^{13}\text{C NMR}$  (100 MHz,  $\text{CDCl}_3$ )  $\delta$  175.4, 159.2, 143.0, 130.7, 129.3, 128.3, 127.9, 127.6, 113.8, 76.8, 72.5, 69.8, 56.2, 55.4, 53.9, 51.6, 27.6, 25.8, 25.7, 22.4, 18.1, -4.6, -5.0; HRMS (ESI-TOF)  $m/z$   $[\text{M} + \text{Na}]^+$  calcd for  $\text{C}_{31}\text{H}_{49}\text{NNaO}_5\text{SSi}$  598.2993, found 598.2998.

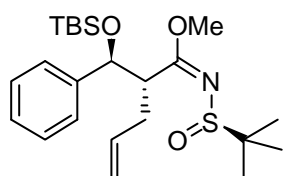

**(5g)** The title compound was prepared using imidate **1g** (65.2 mg, 0.30 mmol, 1.0 equiv), *t*-BuOK (1.0 M in THF, 360  $\mu\text{L}$ , 0.36 mmol, 1.2 equiv) and acylsilane **2d** (86.0 mg, 0.39 mmol, 1.3 equiv). Column chromatography afforded 115.4 mg (88%) of **5g** as a colorless oil.

Analytical data for **5g**:  $R_f = 0.20$  (petroleum ether / ethyl acetate = 10:1);  $[\alpha]_D^{20} = -132.0$  (c 0.20, MeOH);  $^1\text{H NMR}$  (400 MHz,  $\text{CDCl}_3$ )  $\delta$  7.36–7.24 (m, 5H), 5.60–5.49 (m, 1H), 4.89 (t,  $J = 9.2$  Hz, 2H), 4.76 (d,  $J = 9.2$  Hz, 1H), 3.87–3.81 (m, 1H), 3.74 (s, 3H), 2.17–2.08 (m, 1H), 1.94–1.88 (m, 1H), 1.22 (s, 9H), 0.80 (s, 9H), -0.04 (s, 3H), -0.32 (s, 3H);  $^{13}\text{C NMR}$  (100 MHz,  $\text{CDCl}_3$ )  $\delta$  174.6, 142.6, 135.2, 128.3, 128.1, 127.6, 117.1, 76.6, 56.1, 53.8, 51.7, 33.7, 25.8, 22.5, 18.1, -4.6, -5.0; HRMS (ESI-TOF)  $m/z$   $[\text{M} + \text{Na}]^+$  calcd for  $\text{C}_{23}\text{H}_{39}\text{NNaO}_3\text{SSi}$  460.2312, found 460.2314.

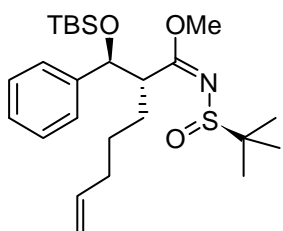

**(5h)** The title compound was prepared using imidate **1h** (73.6 mg, 0.30 mmol, 1.0 equiv), *t*-BuOK (1.0 M in THF, 360  $\mu\text{L}$ , 0.36 mmol, 1.2 equiv) and acylsilane **2d** (86.0 mg, 0.39 mmol, 1.3 equiv). Column chromatography afforded 125.6 mg (90%) of **5h** as a colorless oil.

Analytical data for **5h**:  $R_f = 0.30$  (petroleum ether / ethyl acetate = 10:1);  $[\alpha]_D^{20} = -118.0$  (c 0.20, MeOH);  $^1\text{H NMR}$  (400 MHz,  $\text{CDCl}_3$ )  $\delta$  7.34–7.22 (m, 5H), 5.66–5.56 (m, 1H), 4.87–4.82 (m, 2H), 4.69 (d,  $J = 9.2$  Hz, 1H), 3.75 (s, 3H), 3.73–3.69 (m, 1H), 1.94–1.78 (m, 2H), 1.48–1.38 (m, 1H), 1.22 (s, 9H), 1.19–1.08 (m, 3H), 0.78 (s, 9H), -0.07 (s, 3H), -0.36 (s, 3H);  $^{13}\text{C NMR}$  (100 MHz,  $\text{CDCl}_3$ )  $\delta$  175.7, 143.1, 138.3, 128.2, 127.9, 127.6, 114.7, 76.8, 56.1, 53.8, 51.8, 33.7, 28.6, 26.7, 25.8, 22.4, 18.1, -4.5, -5.0; HRMS (ESI-TOF)  $m/z$   $[\text{M} + \text{Na}]^+$  calcd for  $\text{C}_{25}\text{H}_{43}\text{NNaO}_3\text{SSi}$  488.2625, found 488.2629.

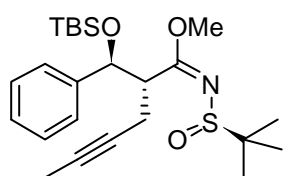

**(5i)** The title compound was prepared using imidate **1i** (68.8 mg, 0.30 mmol, 1.0 equiv), *t*-BuOK (1.0 M in THF, 360  $\mu\text{L}$ , 0.36 mmol, 1.2 equiv) and acylsilane **2d** (86.0 mg, 0.39 mmol, 1.3 equiv). Column chromatography afforded 124.9 mg (93%) of **5i** as a white solid.

Analytical data for **5i**: m.p. 63–65  $^\circ\text{C}$ ;  $R_f = 0.35$  (petroleum ether / ethyl acetate = 10:1);  $[\alpha]_D^{20} = -157.0$  (c 0.20, MeOH);  $^1\text{H NMR}$  (400 MHz,  $\text{CDCl}_3$ )  $\delta$  7.37–7.25 (m, 5H), 4.74 (d,  $J = 8.8$  Hz, 1H), 3.89 (ddd,  $J = 10.4, 8.8, 4.4$  Hz, 1H), 3.77 (s, 3H), 2.26–2.18 (m, 1H), 2.04–1.97 (m, 1H), 1.64 (t,  $J = 2.4$  Hz, 3H), 1.24 (s, 9H), 0.80 (s, 9H), -0.03 (s, 3H), -0.31 (s, 3H);  $^{13}\text{C NMR}$  (100 MHz,  $\text{CDCl}_3$ )  $\delta$  173.7, 142.1, 128.4, 128.2, 127.4, 76.1, 75.8, 56.0, 54.0, 51.0, 25.8, 22.4, 18.8, 18.2, 3.6, -4.6, -5.0; HRMS (ESI-TOF)  $m/z$   $[\text{M} + \text{Na}]^+$  calcd for  $\text{C}_{24}\text{H}_{39}\text{NNaO}_3\text{SSi}$  472.2312, found 472.2308.

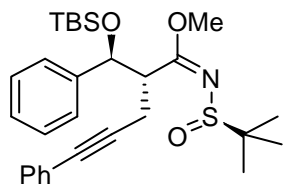

**(5j)** The title compound was prepared using imidate **1j** (87.4 mg, 0.30 mmol, 1.0 equiv), *t*-BuOK (1.0 M in THF, 360  $\mu$ L, 0.36 mmol, 1.2 equiv) and acylsilane **2d** (86.0 mg, 0.39 mmol, 1.3 equiv). Column chromatography afforded 136.3 mg (89%) of **5j** as a white solid. Analytical data for **5j**: m.p. 64–66  $^{\circ}$ C;  $R_f$  = 0.38 (petroleum ether / ethyl acetate = 10:1);  $[\alpha]_D^{20}$  = -152.0 (c 0.10, MeOH);  $^1\text{H NMR}$  (400 MHz,  $\text{CDCl}_3$ )  $\delta$  7.41–7.34 (m, 3H), 7.32–7.30 (m, 2H), 7.29–7.28 (m, 2H), 7.26–7.24 (m, 3H), 4.88 (d,  $J$  = 8.8 Hz, 1H), 4.04 (ddd,  $J$  = 9.6, 9.2, 4.4 Hz, 1H), 3.79 (s, 3H), 2.49 (dd,  $J$  = 16.8, 10.0 Hz, 1H), 2.34 (dd,  $J$  = 16.8, 4.4 Hz, 1H), 1.21 (s, 9H), 0.83 (s, 9H), 0.00 (s, 3H), -0.28 (s, 3H);  $^{13}\text{C NMR}$  (100 MHz,  $\text{CDCl}_3$ )  $\delta$  173.3, 141.9, 131.6, 128.4, 128.3, 127.9, 127.7, 127.4, 123.7, 86.7, 82.3, 75.9, 56.2, 54.1, 50.7, 29.9, 25.8, 22.4, 19.4, 18.2, -4.6, -5.0; HRMS (ESI-TOF)  $m/z$   $[\text{M} + \text{Na}]^+$  calcd for  $\text{C}_{29}\text{H}_{41}\text{NNaO}_3\text{SSi}$  534.2469, found 534.2473.

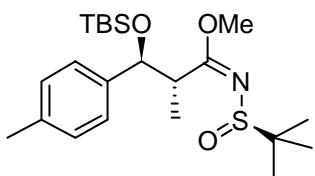

**(5k)** The title compound was prepared using imidate **1a** (57.4 mg, 0.30 mmol, 1.0 equiv), *t*-BuOK (1.0 M in THF, 360  $\mu$ L, 0.36 mmol, 1.2 equiv) and acylsilane **2e** (91.4 mg, 0.39 mmol, 1.3 equiv). Column chromatography afforded 103.3 mg (81%) of **5k** as a white solid. Analytical data for **5k**: m.p. 80–82  $^{\circ}$ C;  $R_f$  = 0.22 (petroleum ether / ethyl acetate = 10:1);  $[\alpha]_D^{20}$  = -109.0 (c 0.10, MeOH);  $^1\text{H NMR}$  (400 MHz,  $\text{CDCl}_3$ )  $\delta$  7.21 (d,  $J$  = 8.0 Hz, 2H), 7.11 (d,  $J$  = 7.6 Hz, 2H), 4.67 (d,  $J$  = 9.2 Hz, 1H), 3.79 (s, 3H), 3.67–3.60 (m, 1H), 2.33 (s, 3H), 1.20 (s, 9H), 0.82–0.81 (m, 12H), -0.05, -0.35;  $^{13}\text{C NMR}$  (100 MHz,  $\text{CDCl}_3$ )  $\delta$  176.3, 139.6, 137.6, 128.9, 127.4, 55.9, 54.0, 46.3, 25.8, 22.2, 21.3, 18.1, 14.2, -4.5, -5.1; HRMS (ESI-TOF)  $m/z$   $[\text{M} + \text{Na}]^+$  calcd for  $\text{C}_{22}\text{H}_{39}\text{NNaO}_3\text{SSi}$  448.2312, found 448.2305.

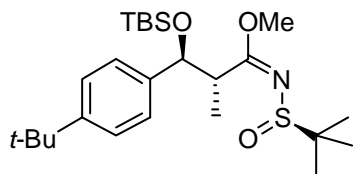

**(5l)** The title compound was prepared using imidate **1a** (57.4 mg, 0.30 mmol, 1.0 equiv), *t*-BuOK (1.0 M in THF, 360  $\mu$ L, 0.36 mmol, 1.2 equiv) and acylsilane **2f** (107.8 mg, 0.39 mmol, 1.3 equiv). Column chromatography afforded 95.6 mg (68%) of **5l** as a white solid. Analytical data for **5l**: m.p. 95–97  $^{\circ}$ C;  $R_f$  = 0.50 (petroleum ether / ethyl acetate = 10:1);  $[\alpha]_D^{20}$  = -116.0 (c 0.20, MeOH);  $^1\text{H NMR}$  (400 MHz,  $\text{CDCl}_3$ )  $\delta$  7.31 (d,  $J$  = 8.4 Hz, 2H), 7.23 (d,  $J$  = 8.4 Hz, 2H), 4.67 (d,  $J$  = 9.6 Hz, 1H), 3.80 (s, 3H), 3.68–3.60 (m, 1H), 1.30 (s, 9H), 1.20 (s, 9H), 0.83–0.81 (m, 12H), -0.05 (s, 3H), -0.37 (s, 3H);  $^{13}\text{C NMR}$  (100 MHz,  $\text{CDCl}_3$ )  $\delta$  176.4, 150.9, 139.4, 127.1, 125.0, 55.8, 54.0, 46.3, 34.7, 31.5, 25.8, 22.2, 18.1, 14.3, -4.5, -5.2; HRMS (ESI-TOF)  $m/z$   $[\text{M} + \text{Na}]^+$  calcd for  $\text{C}_{25}\text{H}_{45}\text{NNaO}_3\text{SSi}$  490.2782, found 490.2779.

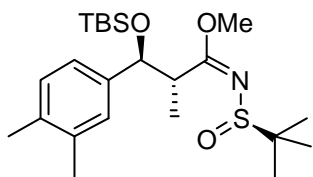

**(5m)** The title compound was prepared using imidate **1a** (57.4 mg, 0.30 mmol, 1.0 equiv), *t*-BuOK (1.0 M in THF, 360  $\mu$ L, 0.36 mmol, 1.2 equiv) and acylsilane **2g** (96.9 mg, 0.39 mmol, 1.3 equiv). Column chromatography afforded 96.3 mg (73%) of **5m** as a white solid. Analytical data for **5m**: m.p. 96–98  $^{\circ}$ C;  $R_f$  = 0.33 (petroleum ether / ethyl acetate =

10:1);  $[\alpha]_D^{20} = -107.0$  (c 0.20, MeOH);  $^1\text{H NMR}$  (400 MHz,  $\text{CDCl}_3$ )  $\delta$  7.08–7.01 (m, 3H), 4.64 (d,  $J = 9.2$  Hz, 1H), 3.80 (s, 3H), 3.65–3.57 (m, 1H), 2.25 (s, 3H), 2.24 (s, 3H), 1.20 (s, 9H), 0.82–0.81 (m, 12H), -0.05 (s, 3H), -0.35 (s, 3H);  $^{13}\text{C NMR}$  (100 MHz,  $\text{CDCl}_3$ )  $\delta$  176.6, 139.9, 136.3, 136.1, 129.4, 128.6, 125.0, 55.8, 54.1, 46.3, 25.8, 22.2, 19.9, 19.7, 18.1, 14.3, -4.4, -5.1; HRMS (ESI-TOF)  $m/z$   $[\text{M} + \text{Na}]^+$  calcd for  $\text{C}_{23}\text{H}_{41}\text{NNaO}_3\text{SSi}$  462.2469, found 462.2476.

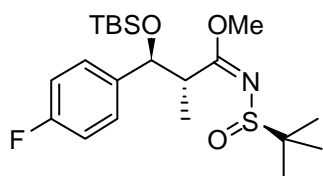

**(5n)** The title compound was prepared using imidate **1a** (57.4 mg, 0.30 mmol, 1.0 equiv), *t*-BuOK (1.0 M in THF, 360  $\mu\text{L}$ , 0.36 mmol, 1.2 equiv) and acylsilane **2h** (93.0 mg, 0.39 mmol, 1.3 equiv). Column chromatography afforded 117.3 mg (91%) of **5n** as a white solid. Analytical data for **5n**: m.p. 87–88  $^\circ\text{C}$ ;  $R_f = 0.44$  (petroleum ether / ethyl acetate = 10:1);  $[\alpha]_D^{20} = -102.0$  (c 0.20, MeOH);  $^1\text{H NMR}$  (400 MHz,  $\text{CDCl}_3$ )  $\delta$  7.30 (dd,  $J = 8.4, 5.6$  Hz, 2H), 7.00 (t,  $J = 8.8$  Hz, 2H), 4.72 (d,  $J = 9.6$  Hz, 1H), 3.77 (s, 3H), 3.68–3.59 (m, 1H), 1.20 (s, 9H), 0.82 (d,  $J = 6.8$  Hz, 3H), 0.80 (s, 9H), -0.04 (s, 3H), -0.34 (s, 3H);  $^{13}\text{C NMR}$  (100 MHz,  $\text{CDCl}_3$ )  $\delta$  175.9, 162.5 (d,  $J = 244.4$ ), 138.5 (d,  $J = 3.2$  Hz), 129.0 (d,  $J = 8.0$  Hz), 15.2 (d,  $J = 21.2$  Hz), 76.6, 56.0, 54.1, 46.3, 25.8, 22.2, 18.0, 14.0, -4.5, -5.1; HRMS (ESI-TOF)  $m/z$   $[\text{M} + \text{Na}]^+$  calcd for  $\text{C}_{21}\text{H}_{36}\text{FNNaO}_3\text{SSi}$  452.2061, found 452.2058.

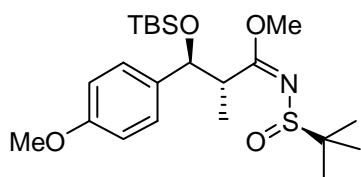

**(5o + 5o')** The title compound was prepared using imidate **1a** (57.4 mg, 0.30 mmol, 1.0 equiv), *t*-BuOK (1.0 M in THF, 360  $\mu\text{L}$ , 0.36 mmol, 1.2 equiv) and acylsilane **2i** (97.7 mg, 0.39 mmol, 1.3 equiv). Column chromatography afforded 51.4 mg (39%) of **5o** as a colorless oil and 10.3 mg (8%) of **5o'** as a colorless oil. Analytical data for **5o** (major diastereoisomer):  $R_f = 0.33$  (petroleum ether / ethyl acetate = 10:1);  $[\alpha]_D^{20} = -114.6$  (c 0.37, MeOH);  $^1\text{H NMR}$  (400 MHz,  $\text{CDCl}_3$ )  $\delta$  7.24 (d,  $J = 8.8$  Hz, 2H), 6.84 (d,  $J = 8.8$  Hz, 2H), 4.66 (d,  $J = 9.6$  Hz, 1H), 3.80 (s, 3H), 3.79 (s, 3H), 3.66–3.59 (m, 1H), 1.20 (s, 9H), 0.82–0.80 (m, 12H), -0.05 (s, 3H), -0.35 (s, 3H);  $^{13}\text{C NMR}$  (100 MHz,  $\text{CDCl}_3$ )  $\delta$  176.3, 159.4, 134.8, 128.5, 113.6, 77.0, 55.9, 55.3, 54.0, 46.4, 25.8, 22.2, 18.1, 14.2, -4.5, -5.1; HRMS (ESI-TOF)  $m/z$   $[\text{M} + \text{Na}]^+$  calcd for  $\text{C}_{22}\text{H}_{39}\text{NNaO}_4\text{SSi}$  464.2261, found 464.2255. Analytical data for **5o'** (minor diastereoisomer):  $R_f = 0.31$  (petroleum ether / ethyl acetate = 5:1);  $[\alpha]_D^{20} = +10.2$  (c 0.24, MeOH);  $^1\text{H NMR}$  (400 MHz,  $\text{CDCl}_3$ )  $\delta$  7.27 (d,  $J = 8.4$  Hz, 2H), 6.81 (d,  $J = 8.4$  Hz, 2H), 4.88 (d,  $J = 6.6$  Hz, 1H), 3.77 (s, 3H), 3.64 (s, 3H), 3.57–3.51 (m, 1H), 1.19 (d,  $J = 7.2$  Hz, 3H), 0.86 (s, 9H), -0.01 (s, 3H), -0.26 (s, 3H);  $^{13}\text{C NMR}$  (100 MHz,  $\text{CDCl}_3$ )  $\delta$  176.4, 158.9, 134.9, 127.8, 113.3, 75.9, 55.9, 55.1, 53.7, 46.4, 25.7, 22.0, 18.1, 13.1, -4.6, -5.2; HRMS (ESI-TOF)  $m/z$   $[\text{M} + \text{Na}]^+$  calcd for  $\text{C}_{22}\text{H}_{39}\text{NNaO}_4\text{SSi}$  464.2261, found 464.2259.

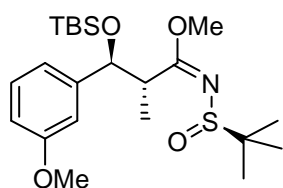

**(5p)** The title compound was prepared using imidate **1a** (57.4 mg, 0.30 mmol, 1.0 equiv), *t*-BuOK (1.0 M in THF, 360  $\mu\text{L}$ , 0.36 mmol, 1.2 equiv) and acylsilane **2j** (97.7 mg, 0.39 mmol, 1.3 equiv). Column chromatography afforded 121.8 mg (92%) of **5p** as a white solid. Analytical data for **5p**: m.p. 86–88  $^\circ\text{C}$ ;  $R_f = 0.14$  (petroleum ether / ethyl acetate = 10:1);  $[\alpha]_D^{20} =$

-102.0 (c 0.20, MeOH);  $^1\text{H}$  NMR (400 MHz,  $\text{CDCl}_3$ )  $\delta$  7.21 (t,  $J = 8.4$  Hz, 1H), 6.96–6.90 (m, 2H), 6.82–6.79 (m, 1H), 4.69 (d,  $J = 9.6$  Hz, 1H), 3.81 (s, 3H), 3.79 (s, 3H), 3.66–3.59 (m, 1H), 1.20 (s, 9H), 0.84–0.82 (m, 12H), -0.03 (s, 3H), -0.32 (s, 3H);  $^{13}\text{C}$  NMR (100 MHz,  $\text{CDCl}_3$ )  $\delta$  176.2, 159.6, 144.2, 129.2, 120.0, 113.6, 112.7, 55.9, 55.4, 54.1, 46.2, 25.8, 22.2, 18.1, 14.3, -4.5, -5.1; HRMS (ESI-TOF)  $m/z$   $[\text{M} + \text{Na}]^+$  calcd for  $\text{C}_{22}\text{H}_{39}\text{NNaO}_4\text{SSi}$  464.2261, found 464.2266.

### Procedure for 1-gram scale preparation of **5a**

To a solution of *N-tert*-butanesulfinylimidate **1a** (956.5 mg, 5.0 mmol, 1.0 equiv) and **3a** (1432.5 mg, 6.5 mmol, 1.3 equiv) in 60 mL toluene was added *t*-BuOK (1.0 M in THF, 6.0 mL, 6.0 mmol, 1.2 equiv) at  $-78$  °C. After the reaction mixture was stirred for 60 min at  $-78$  °C, the reaction was quenched with saturated aqueous ammonium chloride and extracted with ethyl acetate (50 mL x 3). The combined organic layers were washed with brine, dried over  $\text{Na}_2\text{SO}_4$ , filtered, and concentrated under vacuum. The residue was purified by flash column chromatography on silica gel.

### 5. General procedure for preparation of cyclopropane products **4a-c**

A solution of *N-tert*-butanesulfinylimidate (0.30 mmol, 1.0 equiv) in 2.0 mL THF was added to a flame-dried schlenk flask equipped with a magnetic stirring bar and purged with argon. The solution was cooled to  $-78$  °C. Then, KHMDS (1.0 M in THF, 360  $\mu\text{L}$ , 0.36 mmol, 1.2 equiv) was added dropwise to the solution by syringe. After the reaction mixture was stirred for 30 min at  $-78$  °C, the solution of acylsilane **2d** (86.0 mg, 0.39 mmol, 1.3 equiv) in 2.0 mL THF was added to the reaction mixture via syringe. The reaction mixture was stirred for 1 h at  $-78$  °C. Then, the reaction was quenched with saturated aqueous ammonium chloride and extracted with ethyl acetate (3 times). The combined organic layers were washed with brine, dried over  $\text{Na}_2\text{SO}_4$ , filtered, and concentrated under vacuum. The residue was purified by flash column chromatography on silica gel.

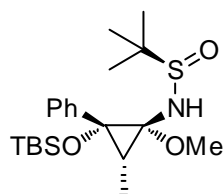

(**4a**) The title compound was prepared using imidate **1a** (57.4 mg, 0.30 mmol, 1.0 equiv), KHMDS (1.0 M in THF, 360  $\mu\text{L}$ , 0.36 mmol, 1.2 equiv) and acylsilane **2d** (86.0 mg, 0.39 mmol, 1.3 equiv). Column chromatography afforded 86.5 mg (70%) of **4a** as a white solid. Analytical data for **4a**: m.p. 94–96 °C;  $R_f = 0.34$  (petroleum ether / ethyl acetate = 3:1);  $[\alpha]_D^{20} = -32.6$  (c 0.46, MeOH);  $^1\text{H}$  NMR (400 MHz,  $\text{CDCl}_3$ )  $\delta$  7.40–7.27 (m, 5H), 3.57 (s, 3H), 3.24 (s, 1H), 2.15 (q,  $J = 6.4$  Hz, 1H), 1.30 (d,  $J = 6.4$  Hz, 3H), 0.99 (s, 9H), 0.86 (s, 9H), 0.01 (s, 3H), -0.52 (s, 3H);  $^{13}\text{C}$  NMR (100 MHz,  $\text{CDCl}_3$ )  $\delta$  137.8, 129.8, 129.0, 128.6, 74.1, 67.6, 55.7, 54.1, 27.2, 26.1, 22.2, 18.5, 7.6, -3.4, -3.6; HRMS (ESI-TOF)  $m/z$   $[\text{M} + \text{Na}]^+$  calcd for  $\text{C}_{21}\text{H}_{37}\text{NNaO}_3\text{SSi}$  434.2156, found 434.2158.

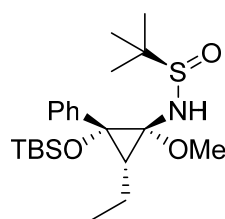

(**4b**) The title compound was prepared using imidate **1b** (41.1 mg, 0.20 mmol, 1.0 equiv), KHMDS (1.0 M in THF, 240  $\mu$ L, 0.24 mmol, 1.2 equiv) and acylsilane **2d** (57.3 mg, 0.26 mmol, 1.3 equiv). Column chromatography afforded 59.0 mg (69%) of **4b** as a colorless oil. Analytical data for **4b**:  $R_f$  = 0.2 (petroleum ether/ethyl acetate = 5:1);  $[\alpha]_D^{20}$  =  $-37.6$  (c 0.49, MeOH);  $^1\text{H NMR}$  (400 MHz,  $\text{CDCl}_3$ )  $\delta$  7.39–7.27 (m, 5H), 3.55 (s, 3H), 3.21 (s, 1H), 2.01–1.98 (m, 1H), 1.80–1.60 (m, 2H), 1.17 (t,  $J$  = 7.2 Hz, 3H), 1.00 (s, 9H), 0.84 (s, 9H),  $-0.02$  (s, 3H),  $-0.48$  (s, 3H);  $^{13}\text{C NMR}$  (100 MHz,  $\text{CDCl}_3$ )  $\delta$  137.9, 129.9, 129.0, 128.6, 74.4, 68.0, 55.6, 54.0, 35.0, 26.1, 22.3, 18.5, 16.4, 14.0,  $-3.4$ ,  $-3.5$ ; HRMS (ESI-TOF)  $m/z$   $[\text{M} + \text{Na}]^+$  calcd for  $\text{C}_{22}\text{H}_{39}\text{NNaO}_3\text{SSi}$  448.2312, found 448.2307.

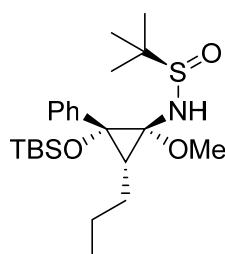

(**4c**) The title compound was prepared using imidate **1c** (43.9 mg, 0.20 mmol, 1.0 equiv), KHMDS (1.0 M in THF, 240  $\mu$ L, 0.24 mmol, 1.2 equiv) and acylsilane **2d** (57.3 mg, 0.26 mmol, 1.3 equiv). Column chromatography afforded 58.7 mg (67%) of **4c** as a colorless oil.  $R_f$  = 0.2 (petroleum ether/ethyl acetate = 5:1);  $[\alpha]_D^{20}$  =  $-35.2$  (c 0.21, MeOH);  $^1\text{H NMR}$  (400 MHz,  $\text{CDCl}_3$ )  $\delta$  7.39–7.28 (m, 5H), 3.56 (s, 3H), 3.21 (s, 1H), 2.06–2.02 (m, 1H), 1.76–1.68 (m, 1H), 1.65–1.52 (m, 3H), 1.03 (t,  $J$  = 7.2 Hz, 3H), 1.00 (s, 9H), 0.85 (s, 9H),  $-0.02$  (s, 3H),  $-0.47$  (s, 3H);  $^{13}\text{C NMR}$  (100 MHz,  $\text{CDCl}_3$ )  $\delta$  137.9, 129.9, 129.0, 128.6, 74.4, 67.9, 55.6, 54.0, 33.2, 26.1, 25.3, 22.8, 22.3, 18.5, 14.5,  $-3.4$ ,  $-3.5$ ; HRMS (ESI-TOF)  $m/z$   $[\text{M} + \text{Na}]^+$  calcd for  $\text{C}_{23}\text{H}_{41}\text{NNaO}_3\text{SSi}$  462.2469, found 462.2461.

## 6. Procedure for preparation of cyclopropane products **3s**

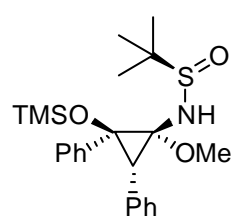

A solution of *N*-*tert*-butanesulfonylimidate **1k** (76.0 mg, 0.30 mmol, 1.0 equiv) in 2.0 mL THF was added to a flame-dried schlenk flask equipped with a magnetic stirring bar and purged with argon. The solution was cooled to  $-78$   $^\circ\text{C}$ . Then, LiHMDS (1.2 M in THF, 300  $\mu$ L, 0.36 mmol, 1.2 equiv) was added dropwise to the solution by syringe. After the reaction mixture was stirred for 30 min at  $-78$   $^\circ\text{C}$ , the solution of acylsilane **2a** (69.5 mg, 0.39 mmol, 1.3 equiv) in 2.0 mL THF was added to the reaction mixture via syringe. The reaction mixture was stirred for 1 h at  $-78$   $^\circ\text{C}$  and was gradually warmed to  $-60$   $^\circ\text{C}$ . At which time, the reaction was quenched with saturated aqueous ammonium chloride and extracted with ethyl acetate (3 times). The combined organic layers were washed with brine, dried over  $\text{Na}_2\text{SO}_4$ , filtered, and



concentrated under vacuum. The residue was purified by flash column chromatography on silica gel to give 98.3 mg (76%) of **3s** as a white solid. Analytical data for **3s**: m.p. 136–138 °C;  $R_f = 0.45$  (petroleum ether / ethyl acetate = 5:1);  $[\alpha]_D^{20} = -79.8$  (c 0.36, MeOH);  $^1\text{H NMR}$  (400 MHz,  $\text{CDCl}_3$ )  $\delta$  7.25–7.20 (m, 5H), 7.18–7.13 (m, 5H), 4.85 (s, 1H), 3.42 (s, 1H), 2.97 (s, 3H), 1.34 (s, 9H), 0.15 (s, 9H);  $^{13}\text{C NMR}$  (100 MHz,  $\text{CDCl}_3$ )  $\delta$  135.1, 133.8, 130.4, 129.9, 128.0, 127.5, 127.3, 126.4, 77.9, 66.4, 56.5, 53.7, 42.6, 22.6, 1.1; HRMS (ESI-TOF)  $m/z$   $[\text{M} + \text{Na}]^+$  calcd for  $\text{C}_{23}\text{H}_{34}\text{NO}_3\text{SSi}$  432.2023, found 432.2028.

## 7. Procedure for the manipulations of cyclopropane product **3ad**

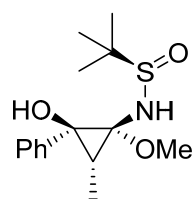

Preparation of alcohol **6** via desilylation of **3ad**: Cyclopropane **3ad** (411.7 mg, 1.0 mmol, 1.0 equiv) was dissolved in 10.0 mL of anhydrous THF and placed under stirring in an ice bath, 189.8 mg (5.0 mmol, 5.0 equiv) of  $\text{LiAlH}_4$  were added in batches. The reaction was checked by TLC examination of an aliquot

which was separately hydrolyzed. After ~10 min, the reaction was hydrolyzed with saturated potassium sodium tartrate aqueous solution (5.0 mL) and extracted with ethyl acetate. The organic layer was separated and the aqueous layer extracted with ethyl acetate. The combined organic extracts were washed with brine, dried over anhydrous  $\text{Na}_2\text{SO}_4$  and concentrated under reduced pressure. The crude product was purified by flash column chromatography on silica gel to yield 277.4 mg (93%) of **6** as a white solid. Analytical data for compound **6**: Analytical data for **6**: m.p. 86–87 °C;  $R_f = 0.1$  (petroleum ether/ethyl acetate = 2:1);  $[\alpha]_D^{20} = +22.4$  (c 0.21, MeOH);  $^1\text{H NMR}$  (400 MHz,  $\text{CDCl}_3$ )  $\delta$  7.54–7.52 (m, 2H), 7.37–7.33 (m, 2H), 7.31–7.28 (m, 1H), 4.93 (s, 1H), 3.77 (s, 1H), 3.30 (s, 3H), 2.06 (q,  $J = 6.8$  Hz, 1H), 1.33 (s, 9H), 1.10 (d,  $J = 6.8$  Hz, 3H);  $^{13}\text{C NMR}$  (100 MHz,  $\text{CDCl}_3$ )  $\delta$  136.1, 130.0, 128.2, 127.7, 78.3, 64.1, 56.8, 54.0, 30.9, 22.9, 9.6. HRMS (ESI-TOF)  $m/z$   $[\text{M} + \text{Na}]^+$  calcd for  $\text{C}_{15}\text{H}_{23}\text{NNaO}_3\text{S}$  320.1291, found 320.1296.

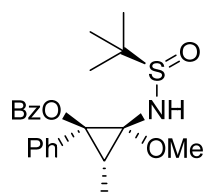

Preparation of benzoic ester **7** via benzylation of **6**: To a stirred solution of **6** (59.5 mg, 0.20 mmol, 1.0 equiv) in 5.0 mL  $\text{CH}_2\text{Cl}_2$  at 0 °C was added 4-dimethylaminopyridine (48.9 mg, 0.40 mmol, 2.0 equiv), followed by benzoyl chloride (30  $\mu\text{L}$ , 0.26 mmol, 1.3 equiv). The resultant solution was

stirred at 0 °C for 5 min and then warmed to room temperature. When the starting material was completely consumed, the reaction mixture was quenched with 5.0 mL saturated aqueous

NaHCO<sub>3</sub>. The organic layer was separated and the aqueous layer extracted with CH<sub>2</sub>Cl<sub>2</sub>. The combined organic extracts were washed with 1.0 M HCl aqueous solution and brine, dried over anhydrous Na<sub>2</sub>SO<sub>4</sub> and concentrated under reduced pressure. The crude product was purified by flash column chromatography on silica gel to yield 78.9 mg (98%) of **7** as a white solid. Analytical data for compound **7**: m.p. 150–151 °C; R<sub>f</sub> = 0.2 (petroleum ether/ethyl acetate = 2:1); [α]<sub>D</sub><sup>20</sup> = +46.3 (c 0.18, MeOH); <sup>1</sup>H NMR (400 MHz, CDCl<sub>3</sub>) δ 7.98–7.95 (m, 2H), 7.65–7.62 (m, 2H), 7.53–7.48 (m, 1H), 7.39–7.27 (m, 5H), 5.10 (s, 1H), 3.37 (s, 3H), 2.51 (q, *J* = 6.8 Hz, 1H), 1.22 (s, 9H), 1.21 (d, *J* = 6.8 Hz, 3H); <sup>13</sup>C NMR (100 MHz, CDCl<sub>3</sub>) δ 167.2, 133.3, 132.9, 131.6, 130.2, 129.9, 128.4, 128.3, 128.0, 77.7, 68.1, 56.8, 53.7, 29.8, 22.9, 9.6. HRMS (ESI-TOF) *m/z* [M + Na]<sup>+</sup> calcd for C<sub>22</sub>H<sub>27</sub>NNaO<sub>4</sub>S 424.1553, found 424.1557.

Procedure for ring-opening reaction of cyclopropane **3ad** with L-selectride: To the cyclopropane **3ad** (41.2 mg, 0.10 mmol, 1.0 equiv) in THF (2.0 mL) was added L-selectride (0.40 mL, 1.0 M in THF, 0.40 mmol, 4.0 equiv) at -40 °C. The resulting solution was gradually allowed to warm to 0 °C. Then the solution was quenched with saturated aqueous ammonium chloride and diluted with ethyl acetate. The organic layer was separated and the aqueous layer extracted with ethyl acetate. The combined organic extracts were washed with brine, dried over anhydrous Na<sub>2</sub>SO<sub>4</sub> and concentrated under reduced pressure. The crude product was purified by flash column chromatography on silica gel to yield 24.4 mg (59%) of **5a** as a white solid. For characterization data of compound **5a**, see page 18.

Procedure for ring-opening reaction of cyclopropane **3ad** with LiHMDS: Cyclopropane **3ad** (41.2 mg, 0.10 mmol, 1.0 equiv) was dissolved in THF (2.0 mL). The solution was cooled to -78 °C and LiHMDS (1.2 M in THF, 0.10 mL, 0.12 mmol, 1.2 equiv) was then added to the solution. The reaction mixture was stirred for 30 min at -78 °C and then gradually warmed up to room temperature. When the starting material was completely consumed, the reaction mixture was quenched with saturated aqueous ammonium chloride and diluted with ethyl acetate. The organic layer was separated and the aqueous layer extracted with ethyl acetate. The combined organic extracts were washed with brine, dried over anhydrous Na<sub>2</sub>SO<sub>4</sub> and concentrated under reduced pressure. The crude product was purified by flash column chromatography on silica gel to yield 37.4 mg (91%) of **5a** as a white solid. For characterization data of compound **5a**, see page 18.

## 8. $^1\text{H}$ NMR and $^{13}\text{C}$ NMR spectra for all new compounds

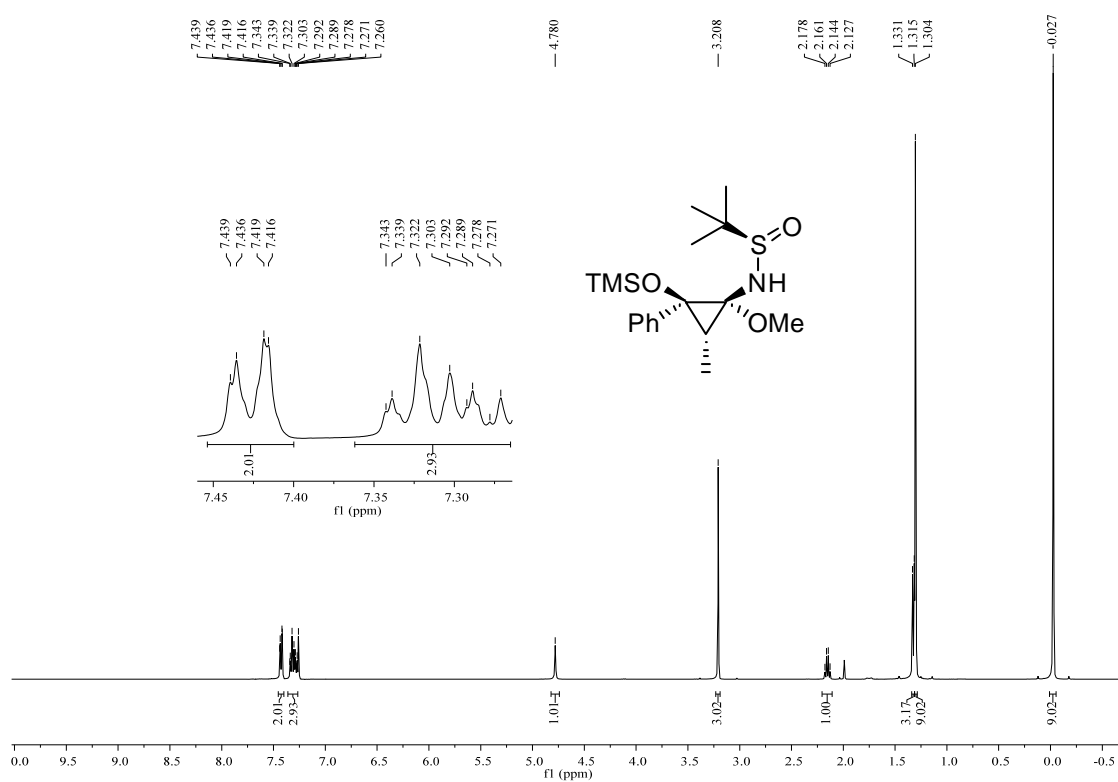

$^1\text{H}$  NMR spectrum (CDCl<sub>3</sub>, 400 MHz) of **3aa**

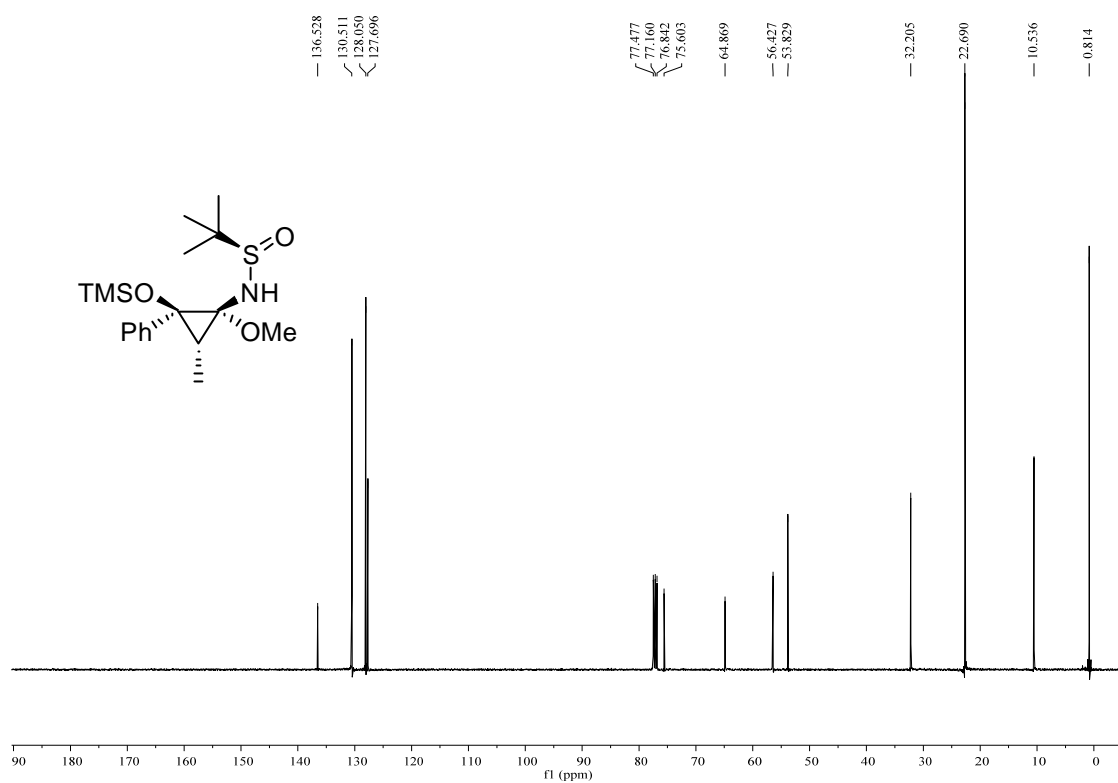

$^{13}\text{C}$  NMR spectrum (CDCl<sub>3</sub>, 100 MHz) of **3aa**

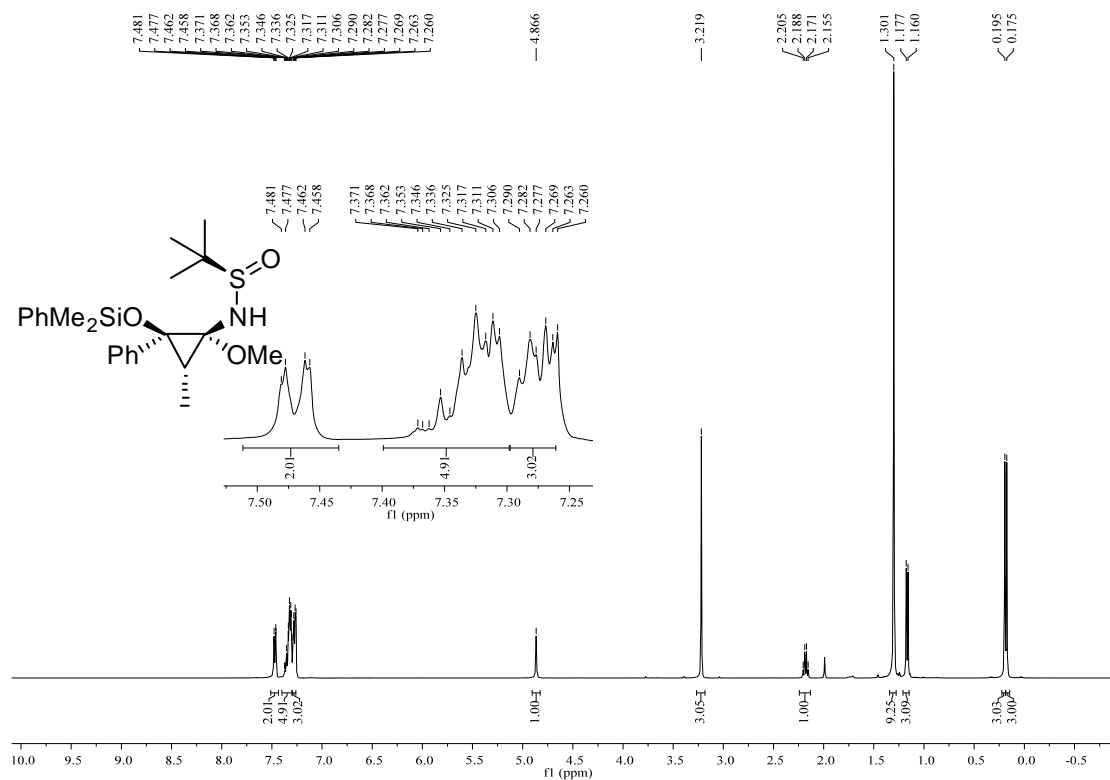

**<sup>1</sup>H NMR spectrum (CDCl<sub>3</sub>, 400 MHz) of **3ab****

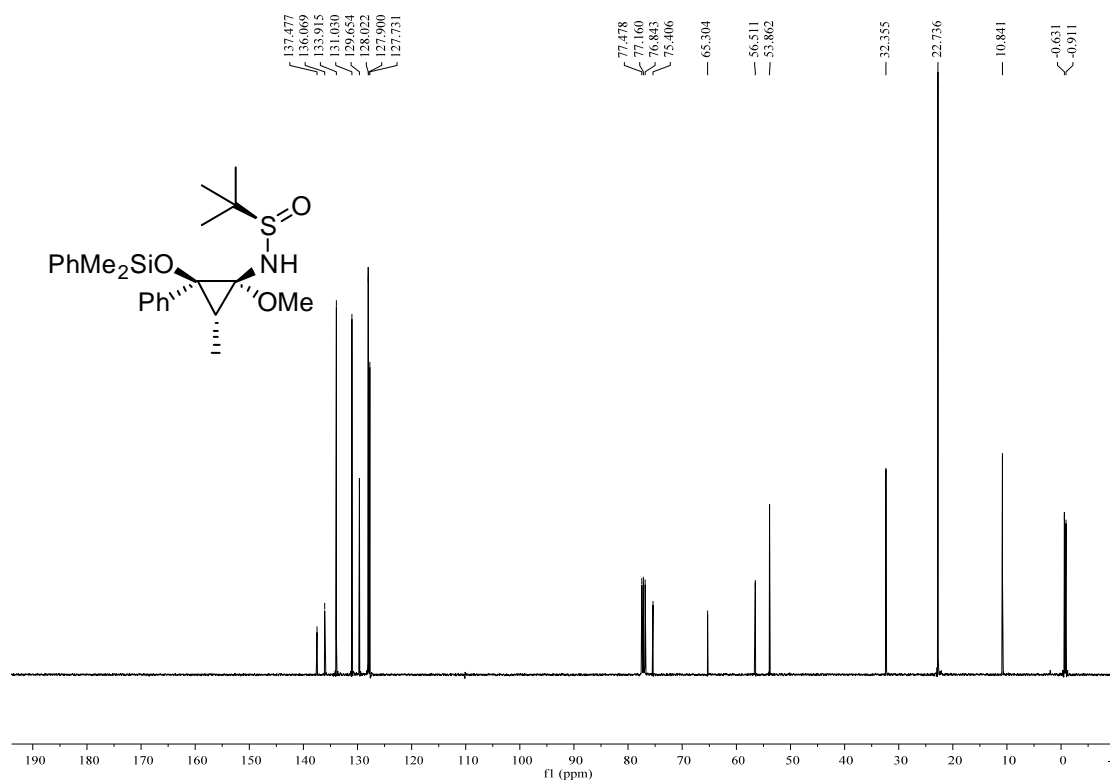

**<sup>13</sup>C NMR spectrum (CDCl<sub>3</sub>, 100 MHz) of **3ab****

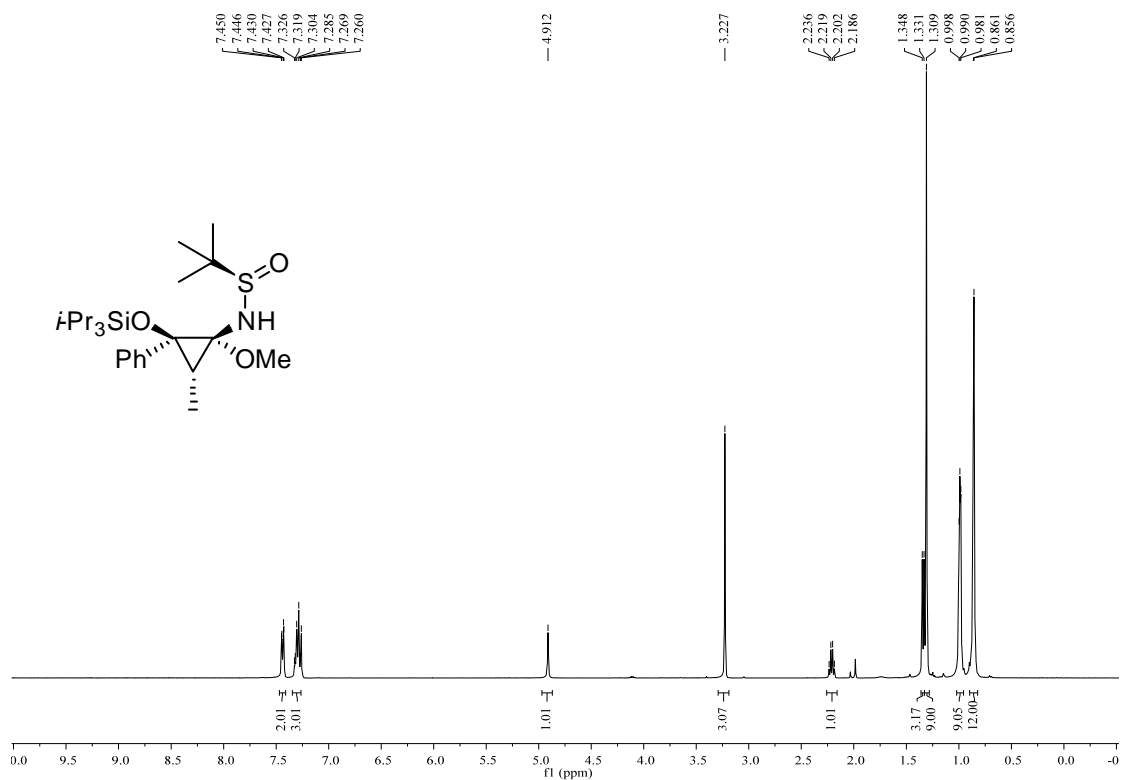

<sup>1</sup>H NMR spectrum (CDCl<sub>3</sub>, 400 MHz) of **3ac**

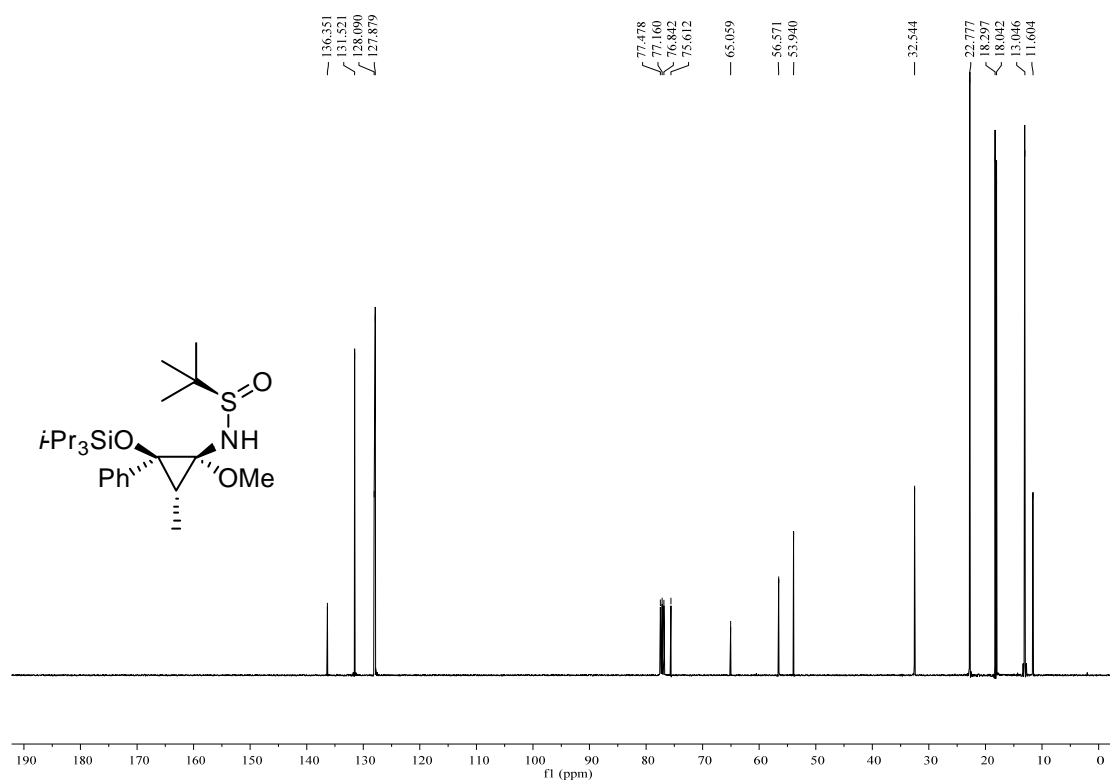

<sup>13</sup>C NMR spectrum (CDCl<sub>3</sub>, 100 MHz) of **3ac**

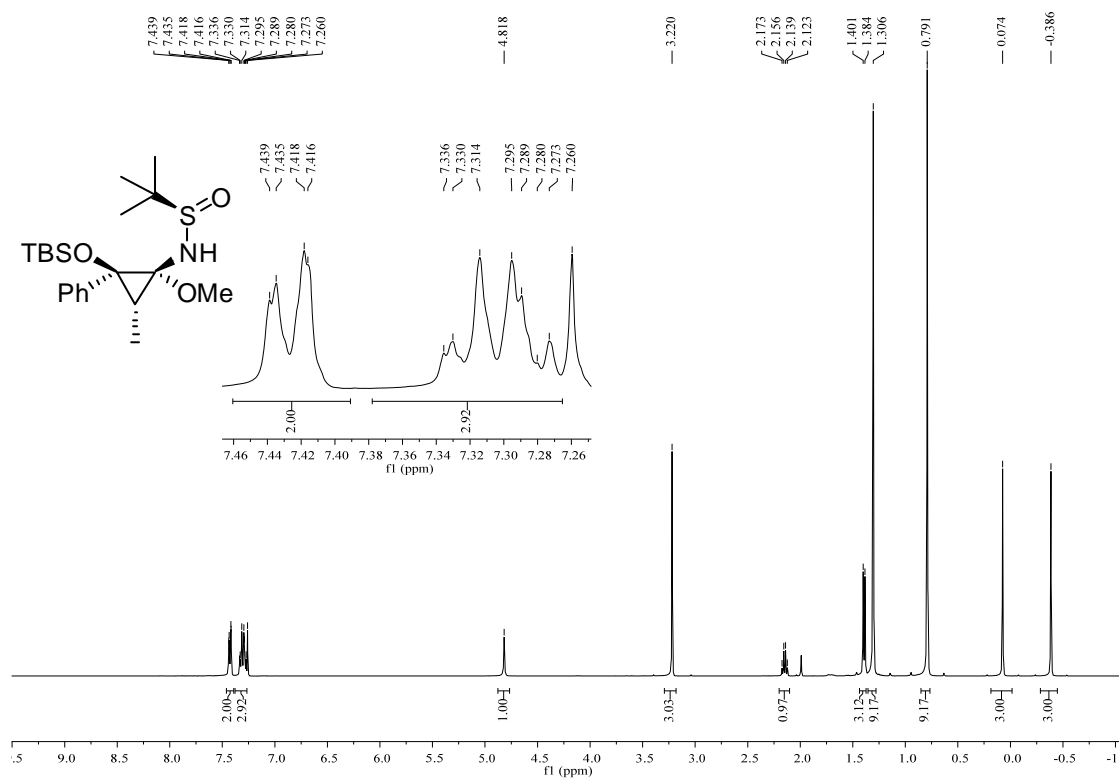

<sup>1</sup>H NMR spectrum (CDCl<sub>3</sub>, 400 MHz) of 3ad

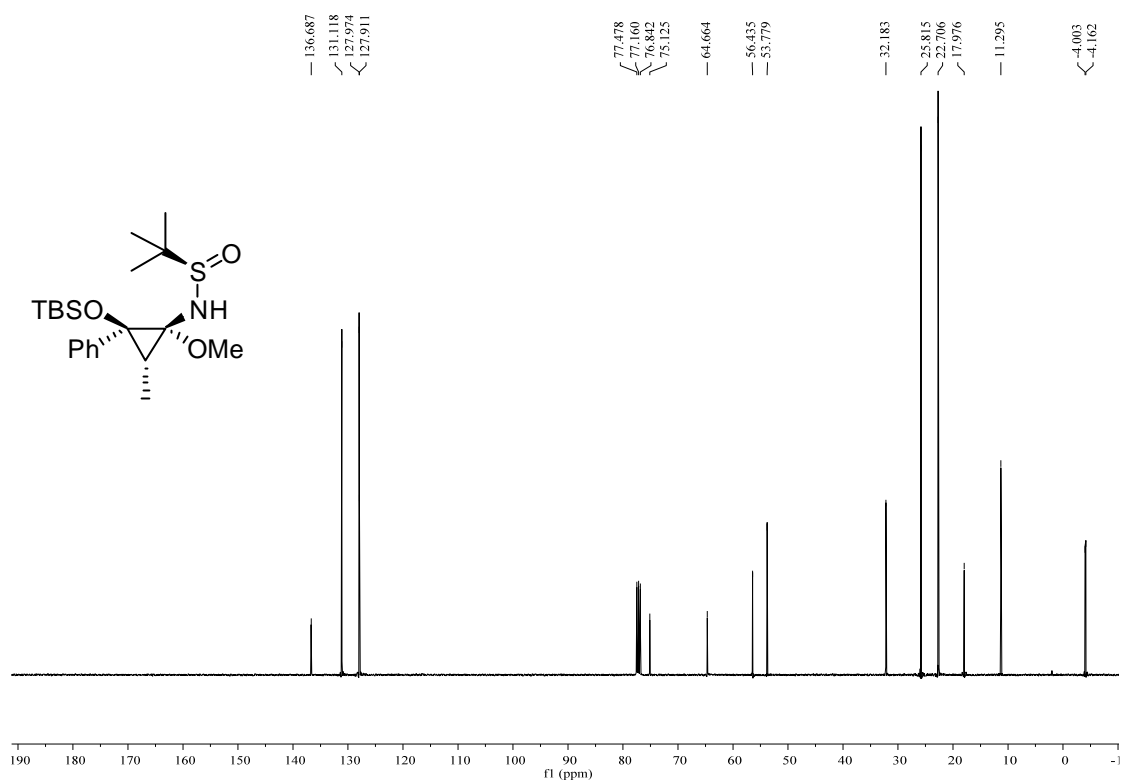

<sup>13</sup>C NMR spectrum (CDCl<sub>3</sub>, 100 MHz) of 3ad

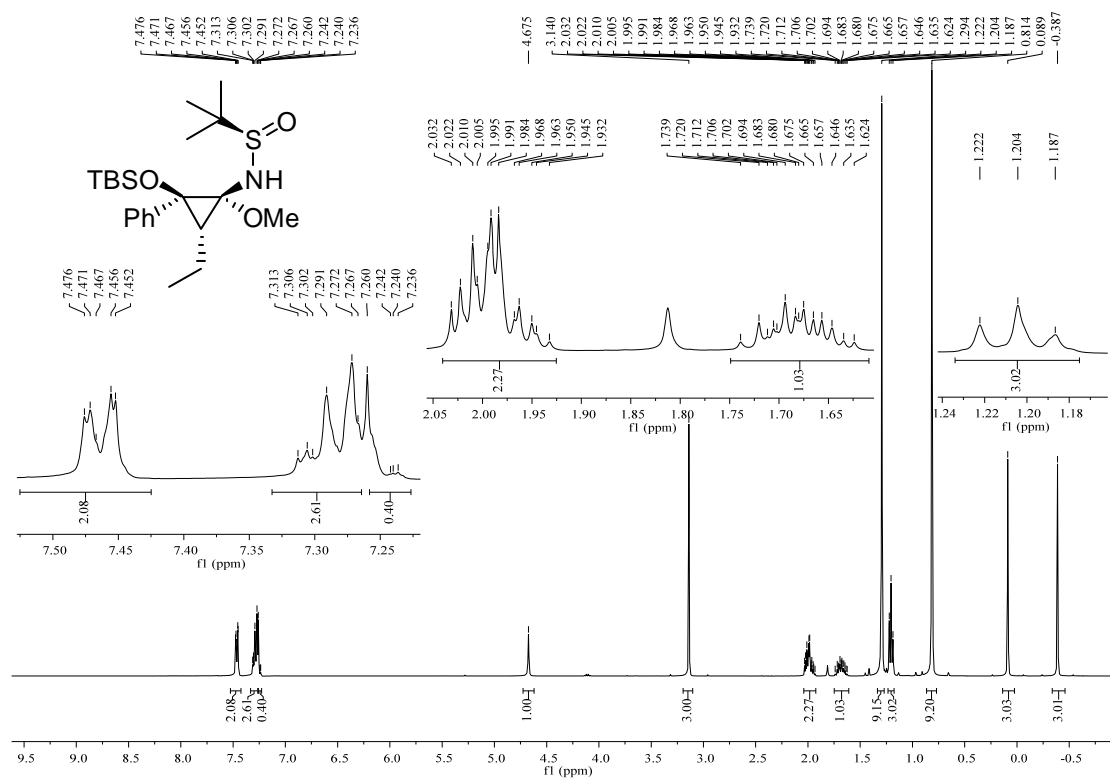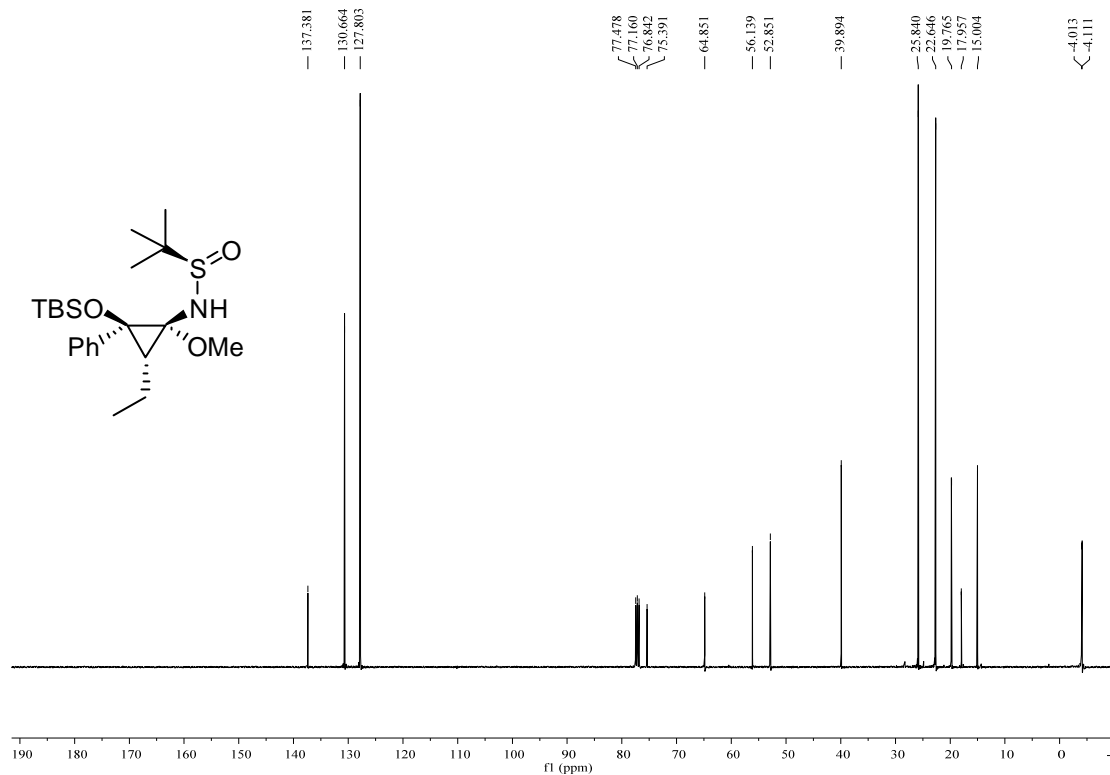

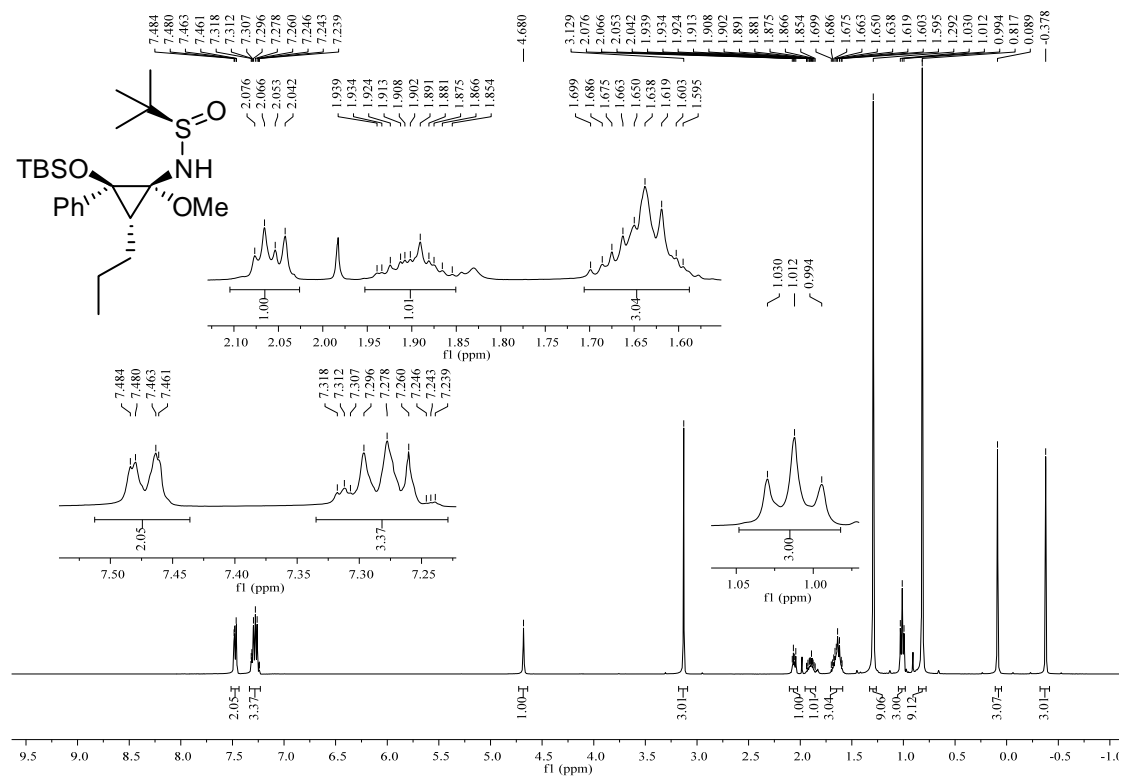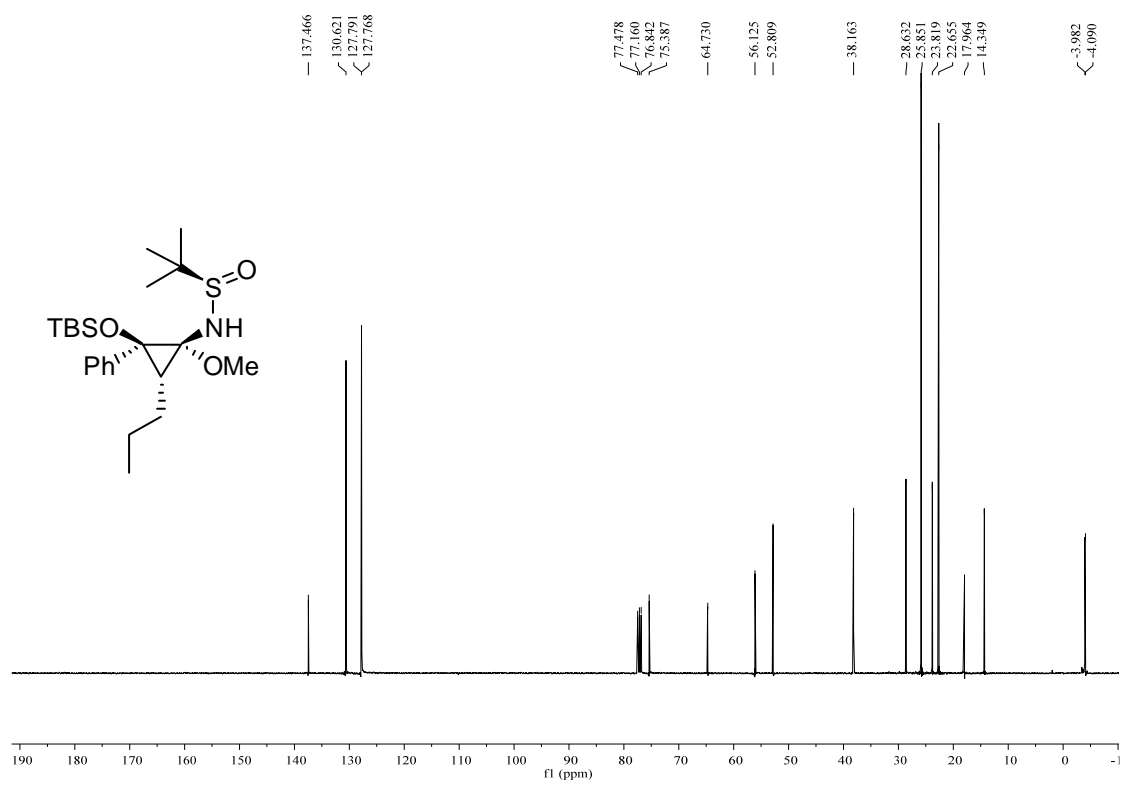



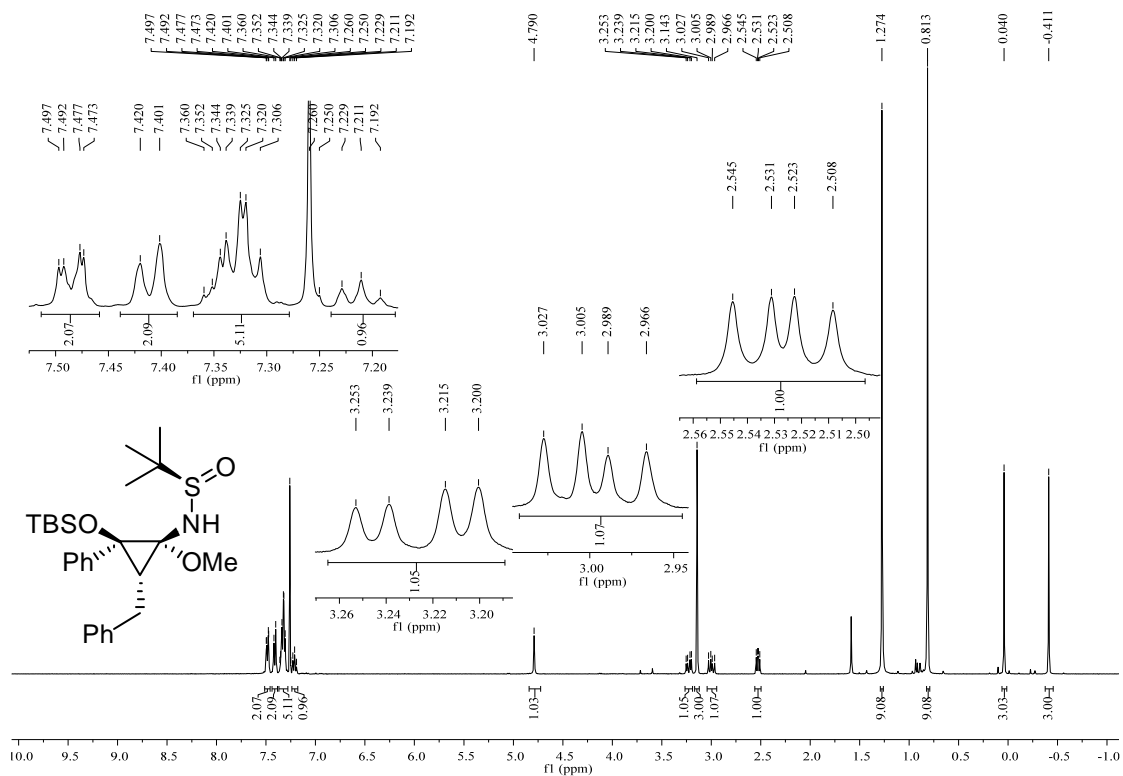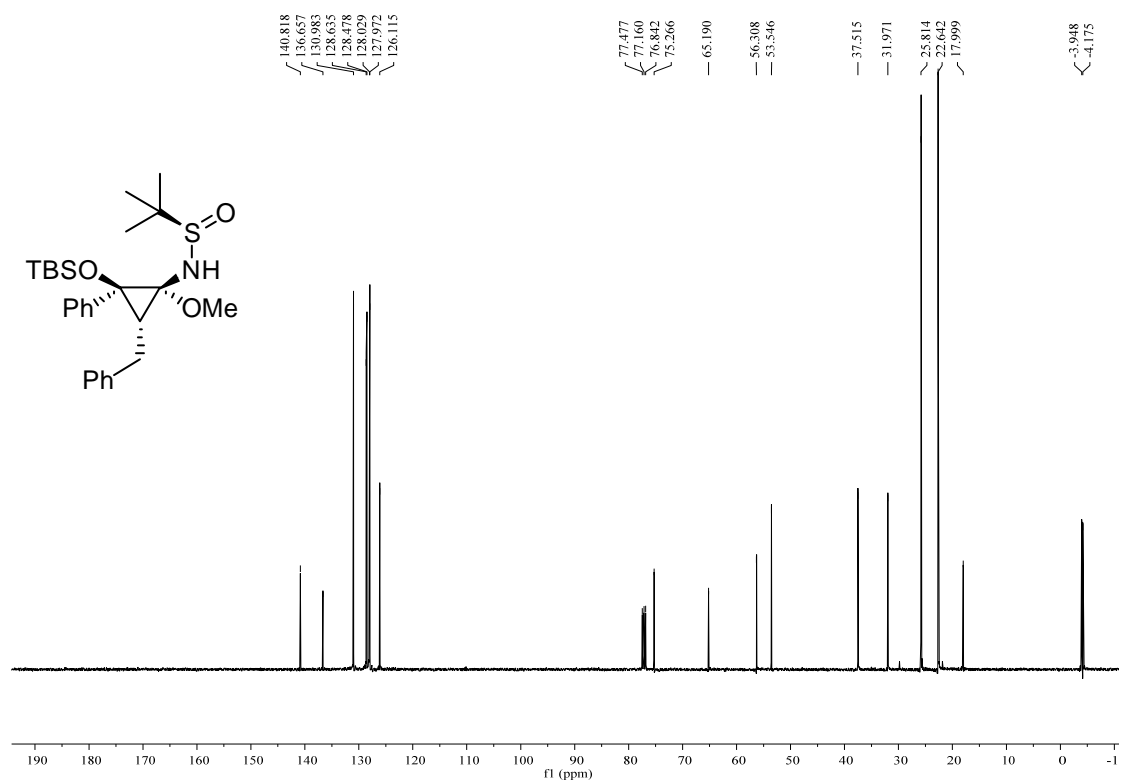

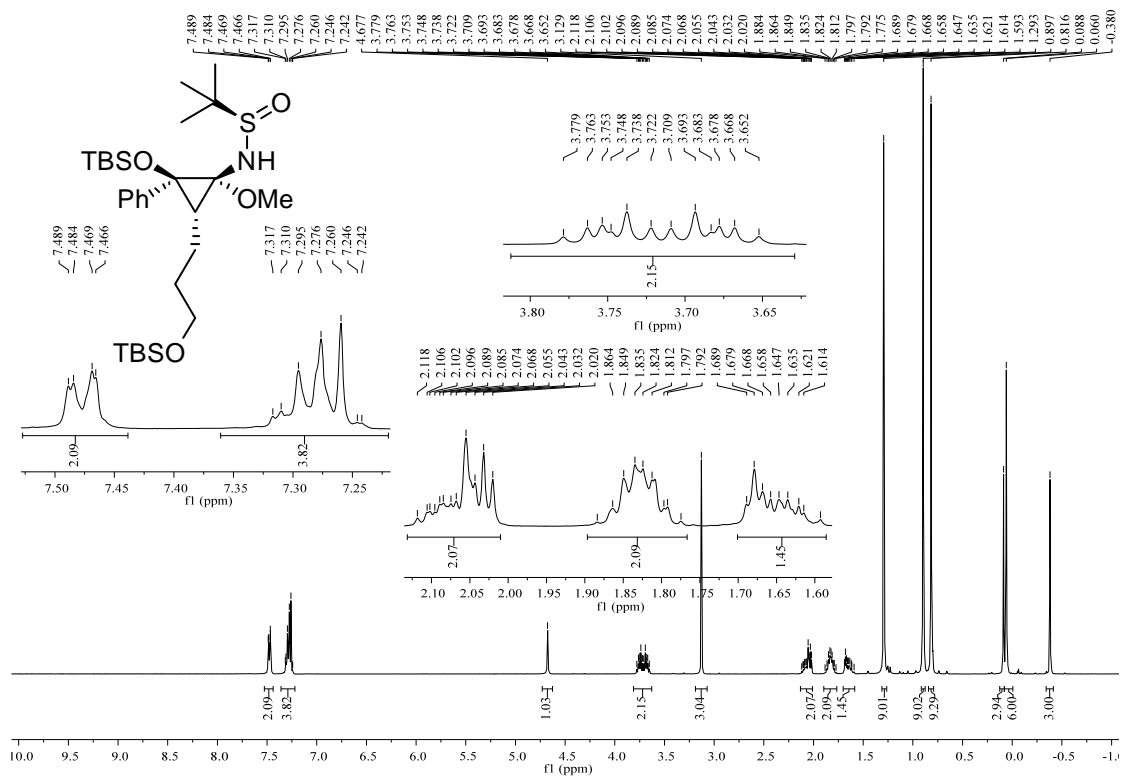

**<sup>1</sup>H NMR spectrum (CDCl<sub>3</sub>, 400 MHz) of 3e**

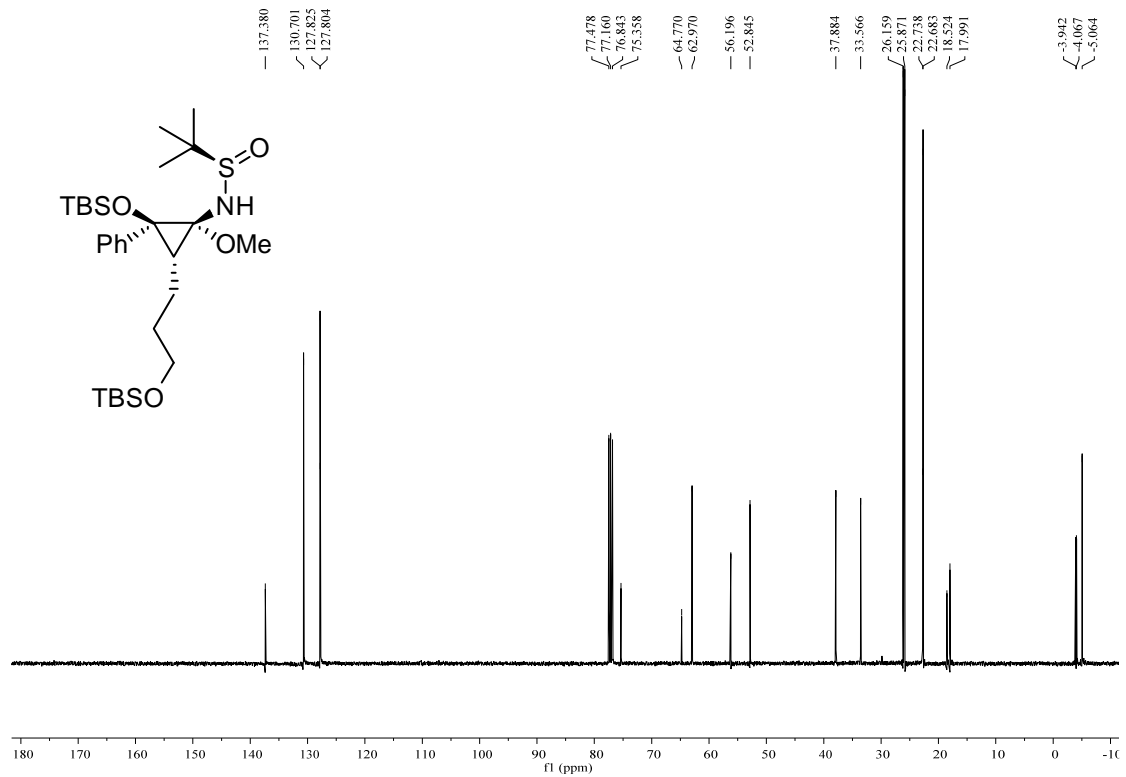

**<sup>13</sup>C NMR spectrum (CDCl<sub>3</sub>, 100 MHz) of 3e**

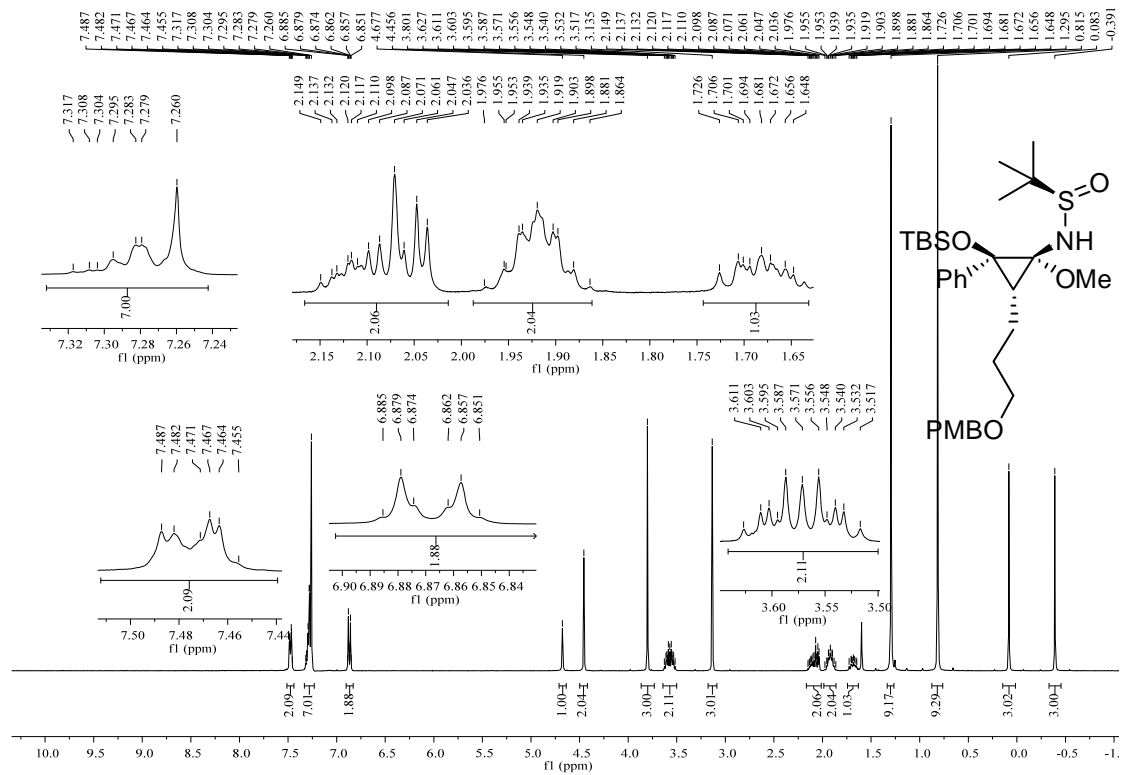

<sup>1</sup>H NMR spectrum (CDCl<sub>3</sub>, 400 MHz) of **3f**

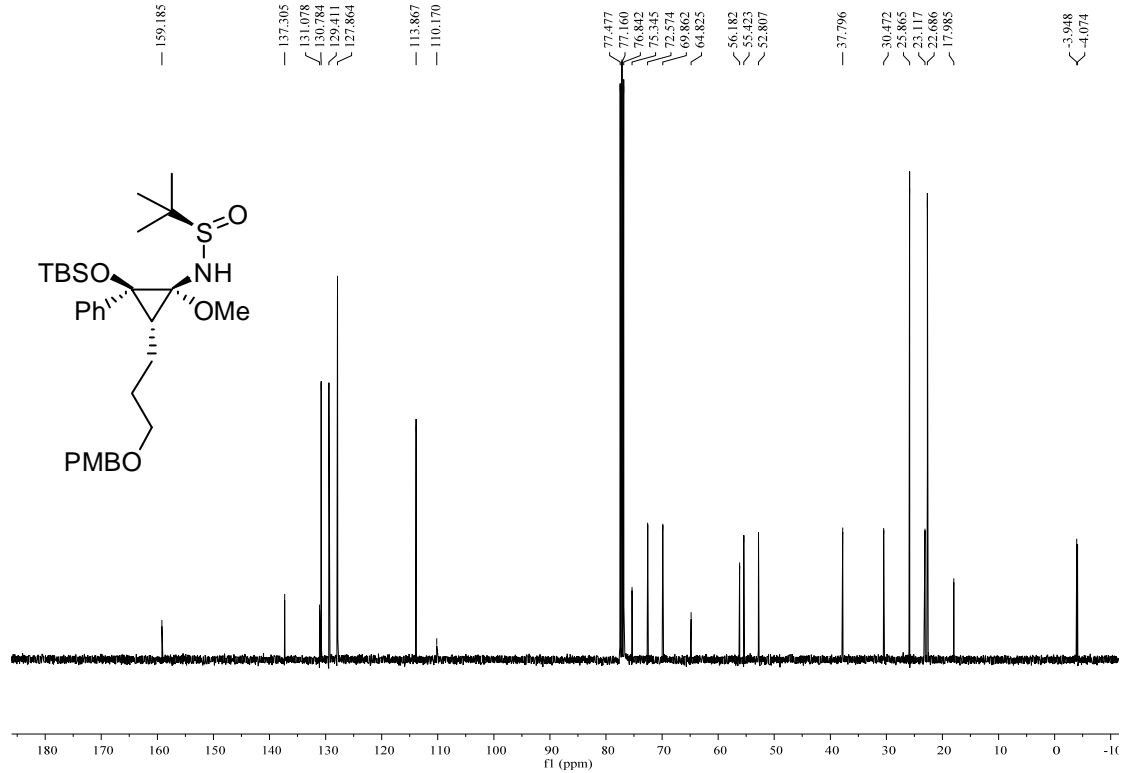

<sup>13</sup>C NMR spectrum (CDCl<sub>3</sub>, 100 MHz) of **3f**

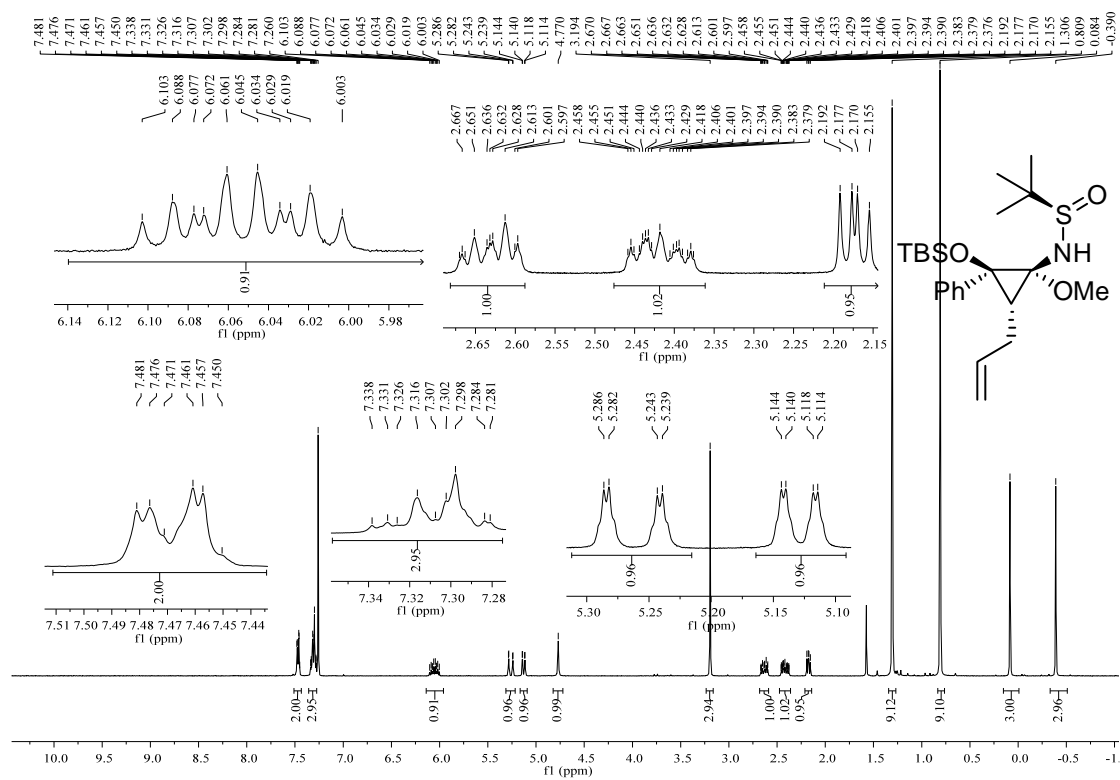

$^1\text{H}$  NMR spectrum ( $\text{CDCl}_3$ , 400 MHz) of **3g**

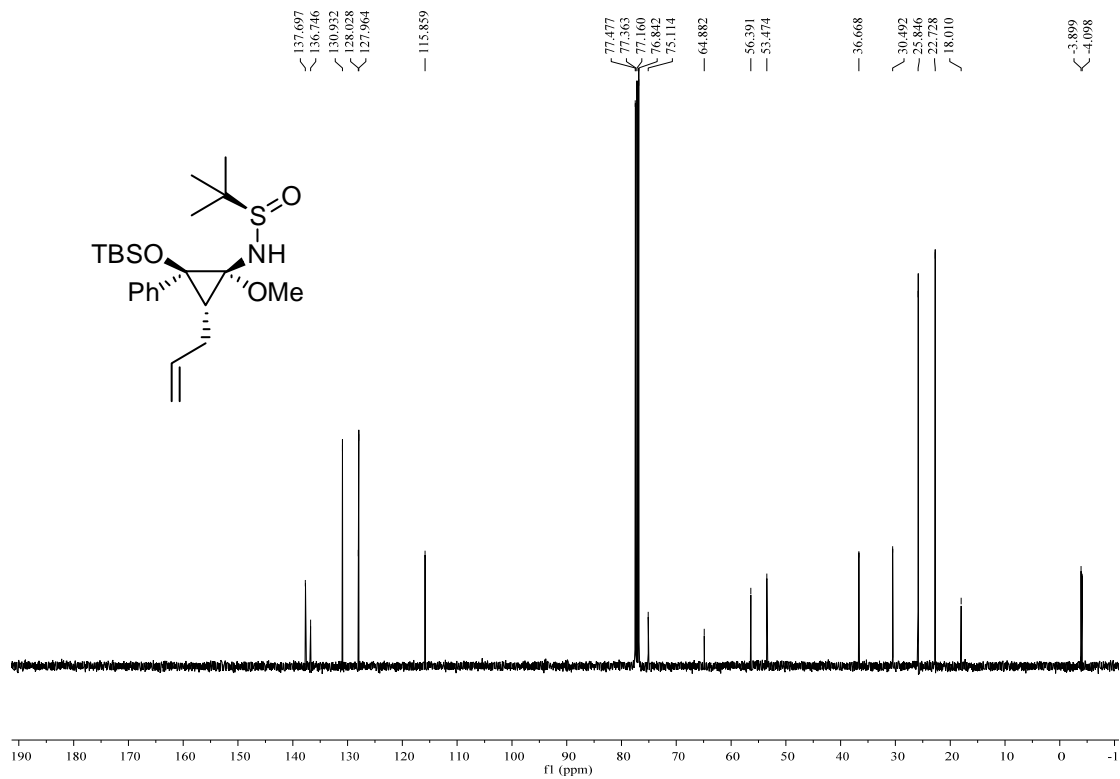

$^{13}\text{C}$  NMR spectrum ( $\text{CDCl}_3$ , 100 MHz) of **3g**

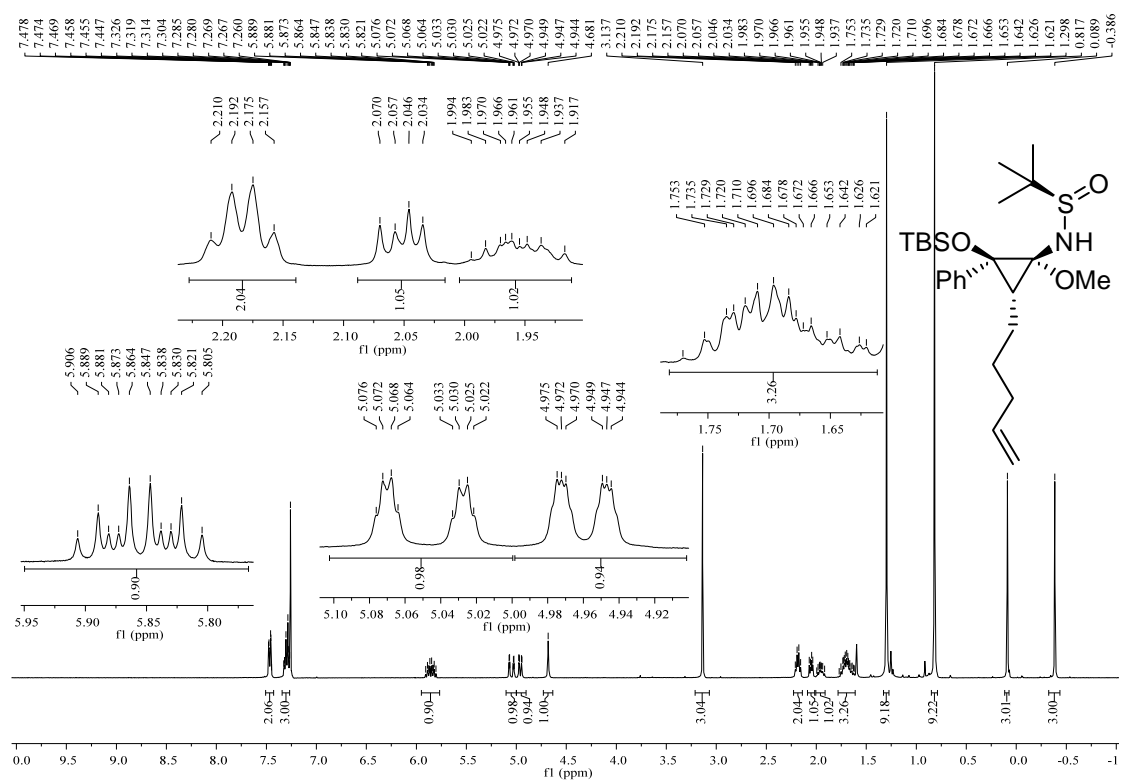

<sup>1</sup>H NMR spectrum (CDCl<sub>3</sub>, 400 MHz) of **3h**

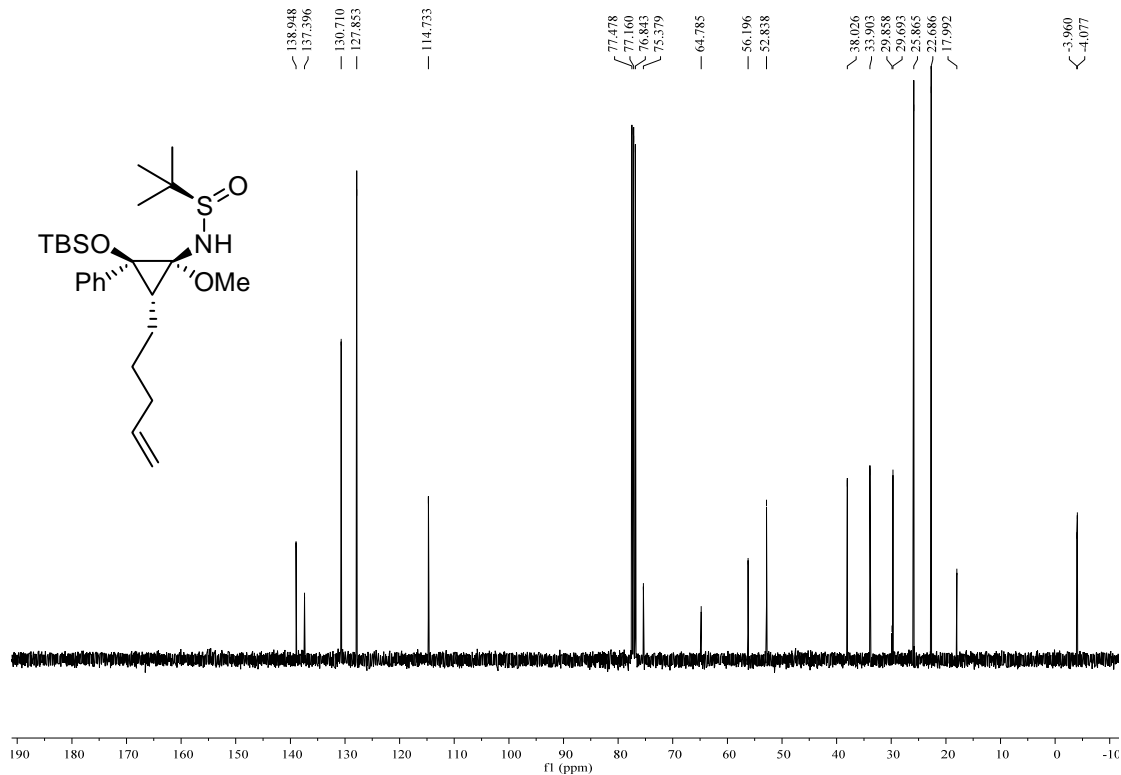

<sup>13</sup>C NMR spectrum (CDCl<sub>3</sub>, 100 MHz) of **3h**

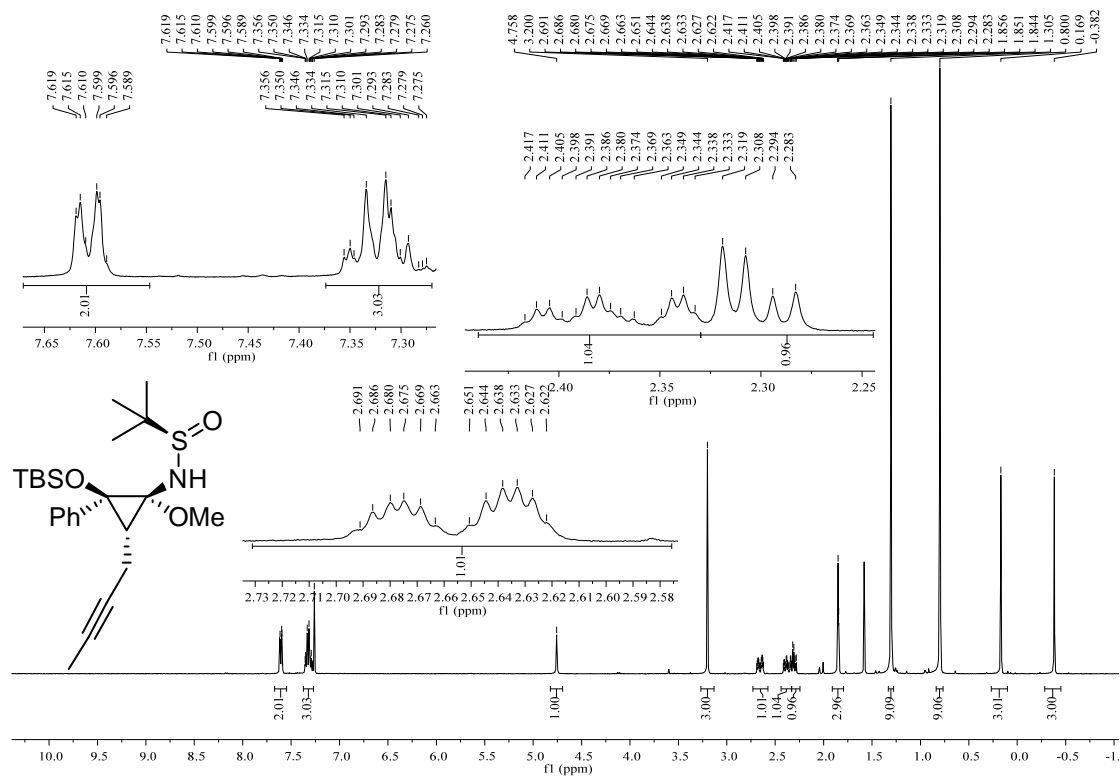

<sup>1</sup>H NMR spectrum (CDCl<sub>3</sub>, 400 MHz) of **3i**

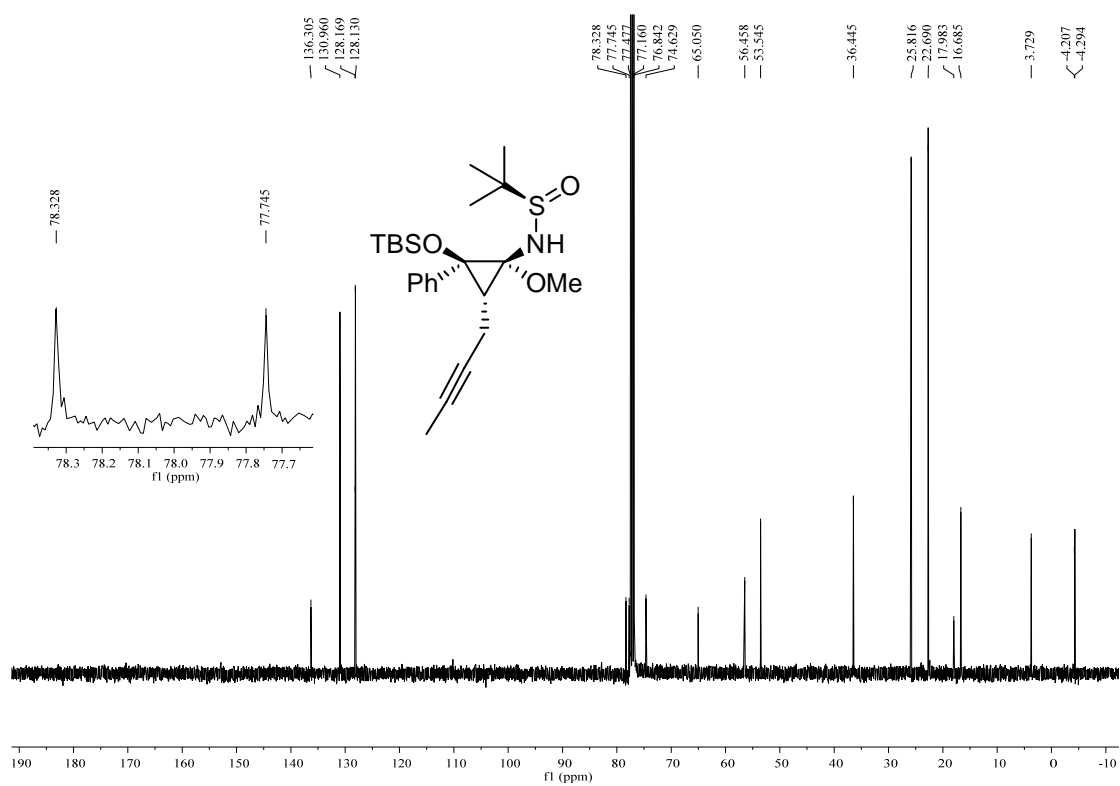

<sup>13</sup>C NMR spectrum (CDCl<sub>3</sub>, 100 MHz) of **3i**

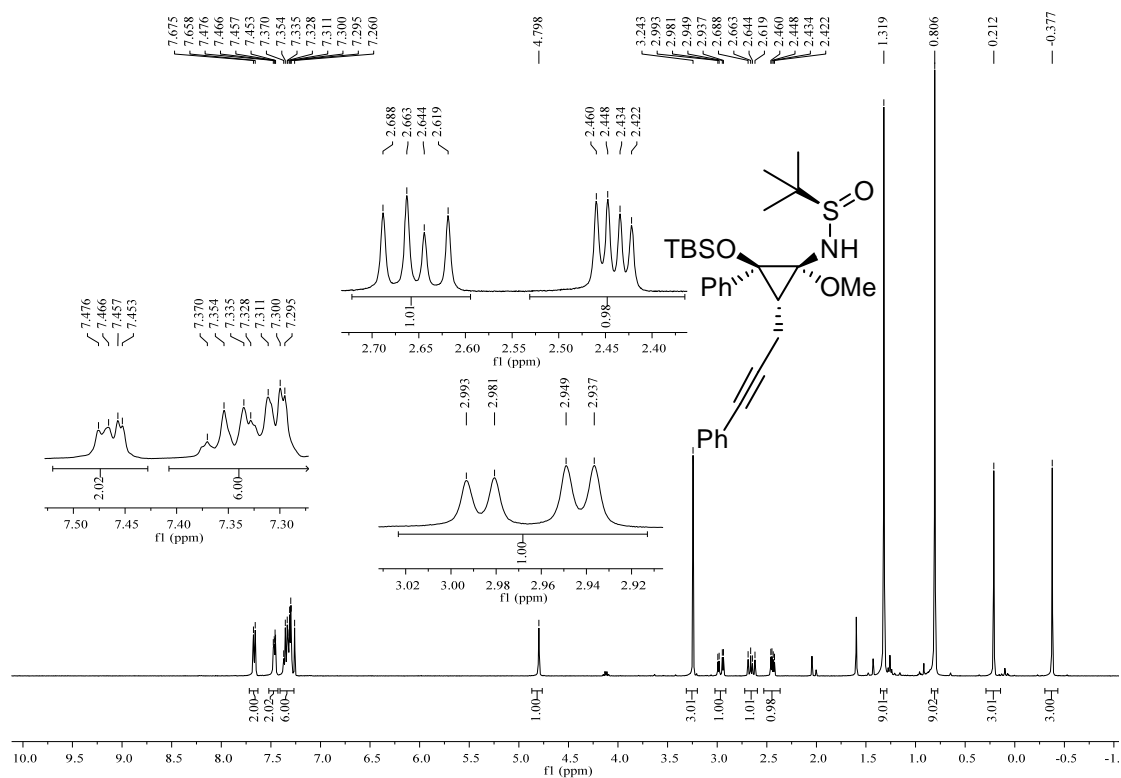

**<sup>1</sup>H NMR spectrum (CDCl<sub>3</sub>, 400 MHz) of 3j**

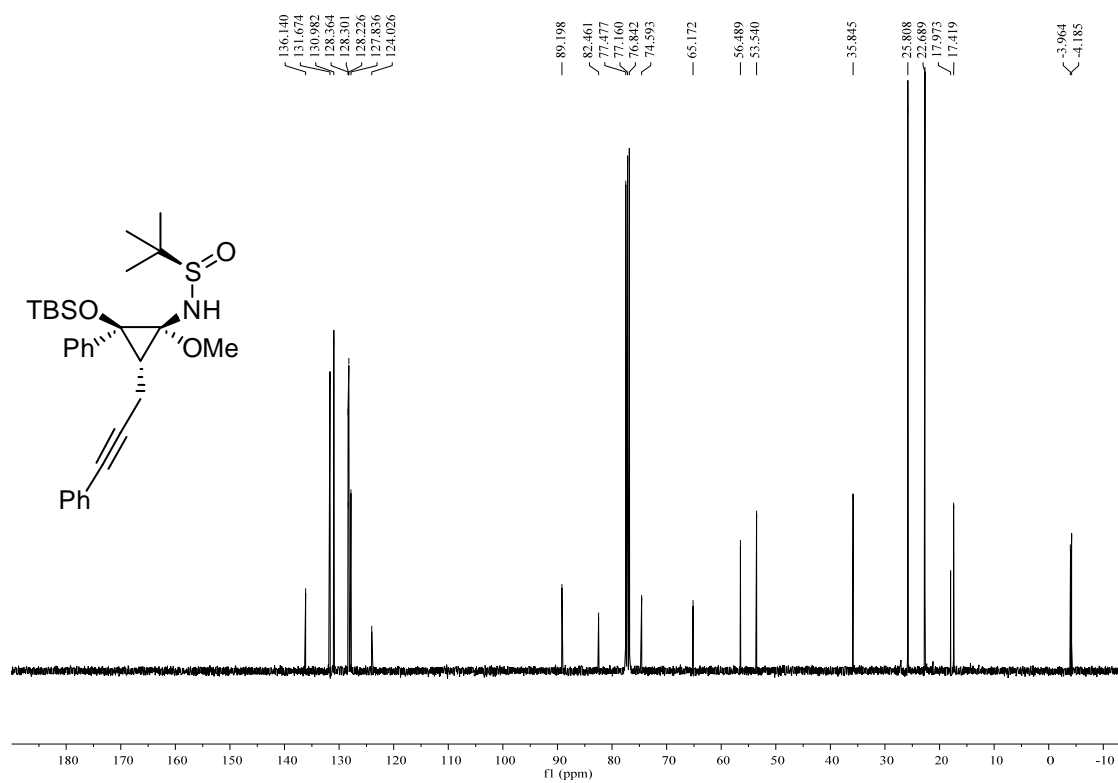

**<sup>13</sup>C NMR spectrum (CDCl<sub>3</sub>, 100 MHz) of 3j**

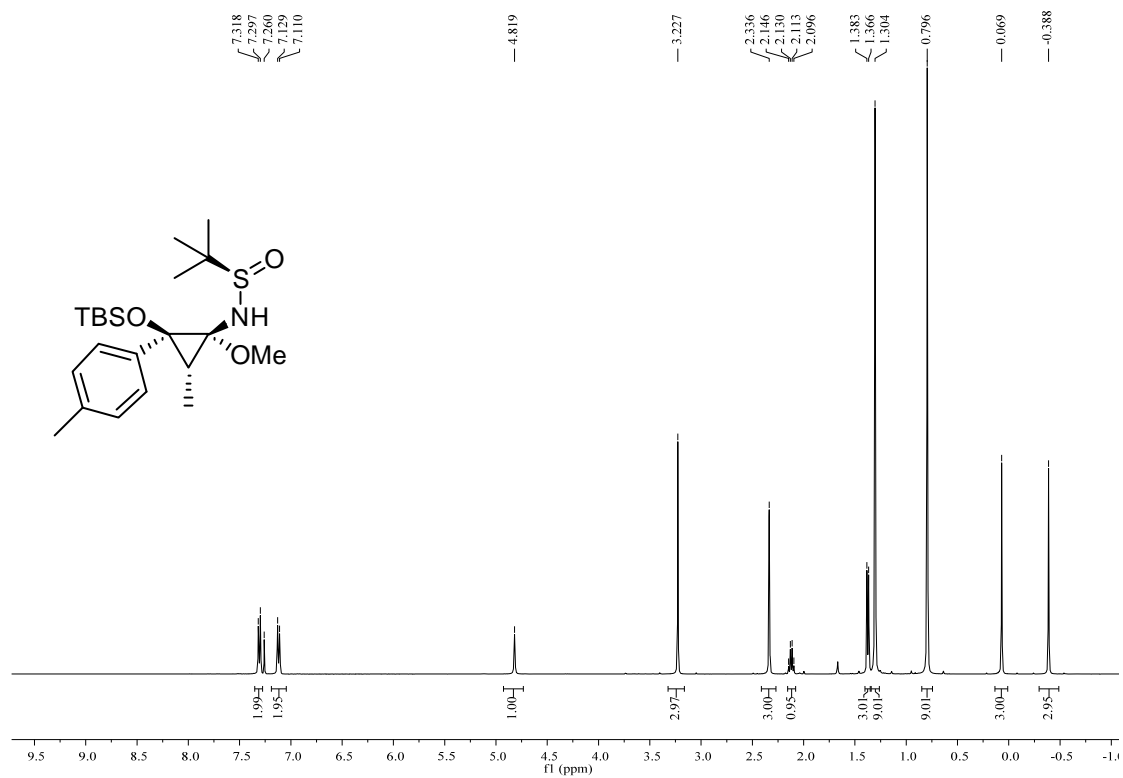

<sup>1</sup>H NMR spectrum (CDCl<sub>3</sub>, 400 MHz) of **3k**

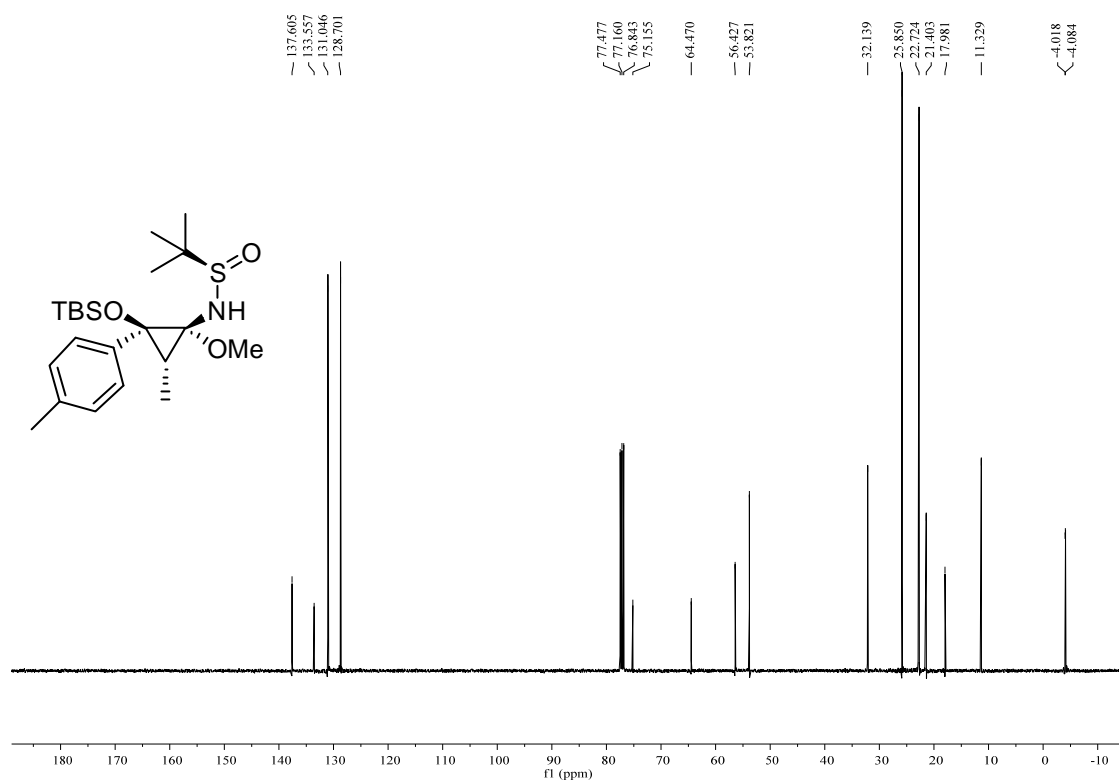

<sup>13</sup>C NMR spectrum (CDCl<sub>3</sub>, 100 MHz) of **3k**



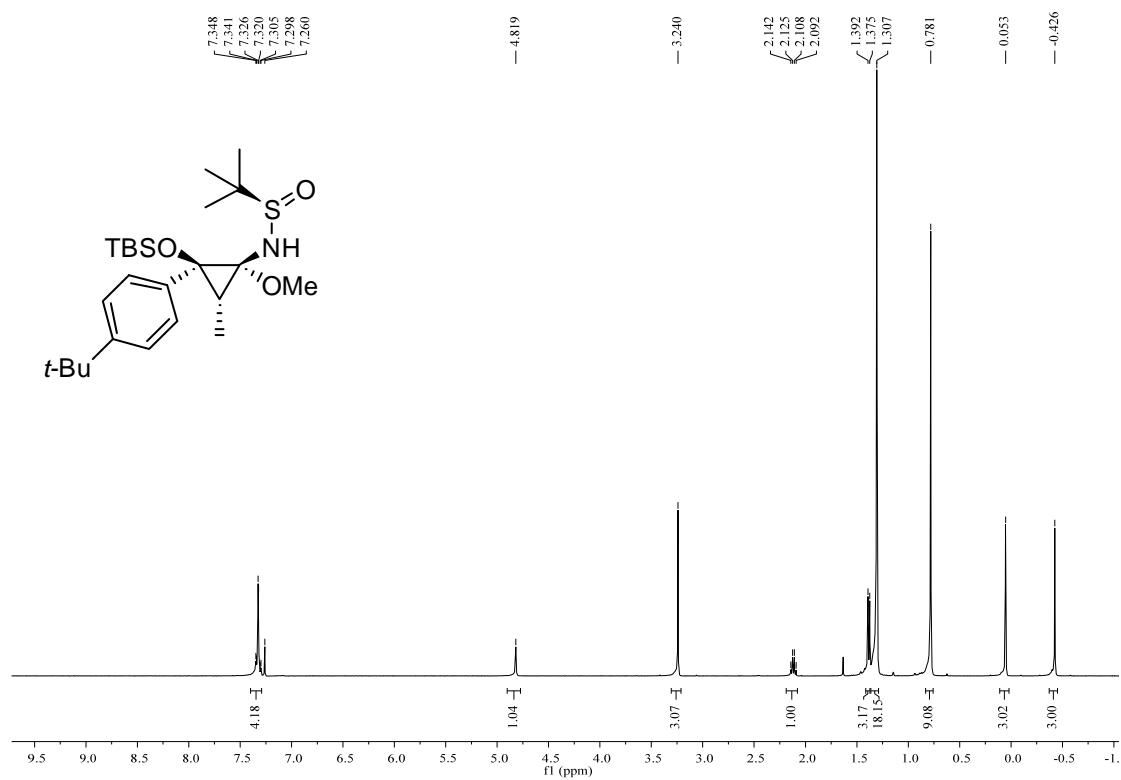

<sup>1</sup>H NMR spectrum (CDCl<sub>3</sub>, 400 MHz) of **31**

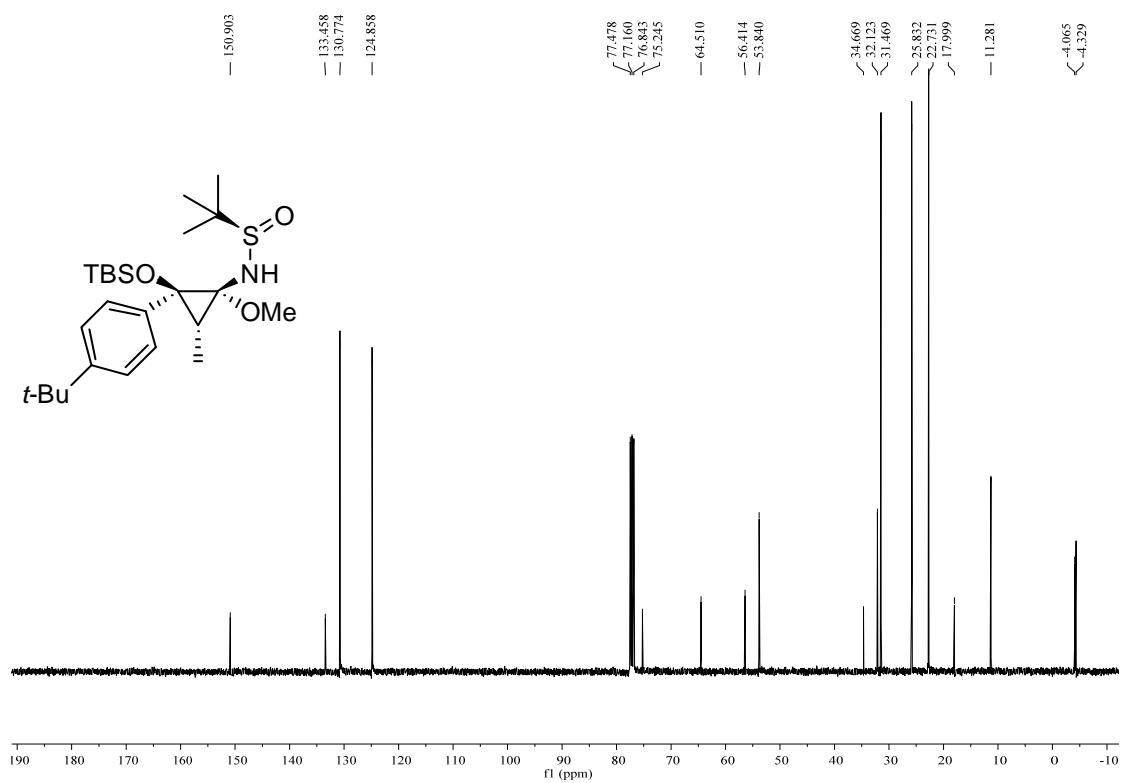

<sup>13</sup>C NMR spectrum (CDCl<sub>3</sub>, 100 MHz) of **31**

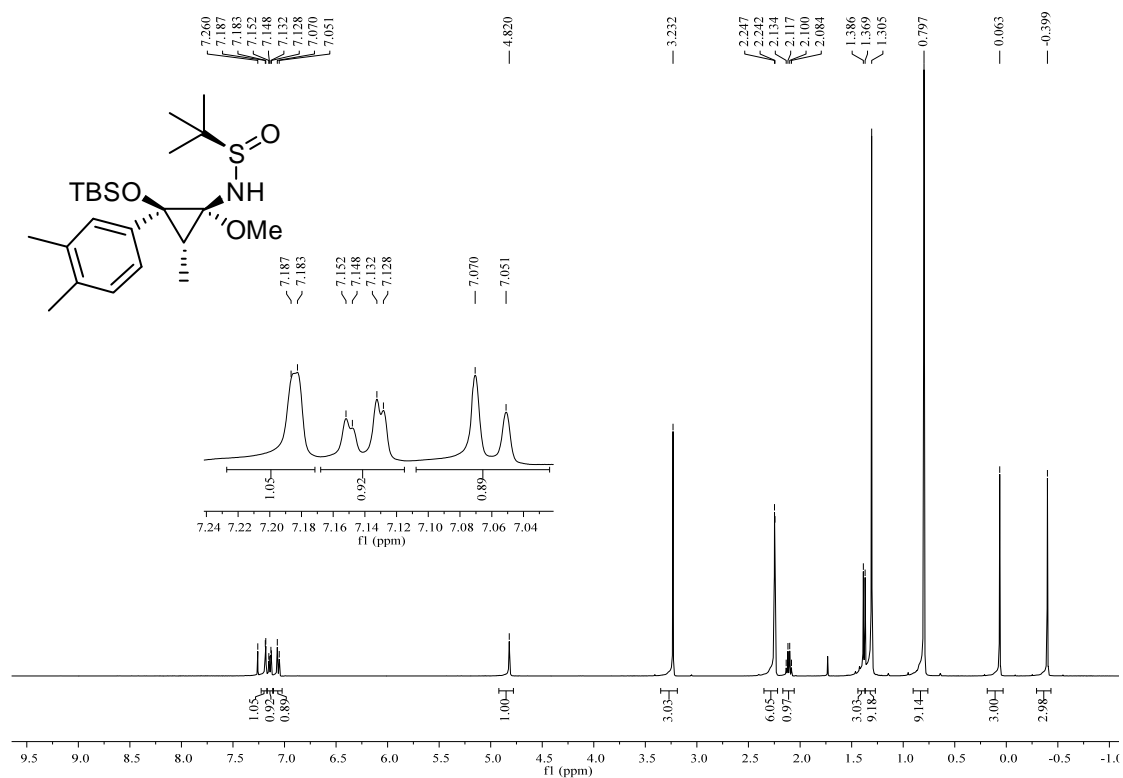

**<sup>1</sup>H NMR spectrum (CDCl<sub>3</sub>, 400 MHz) of **3m****

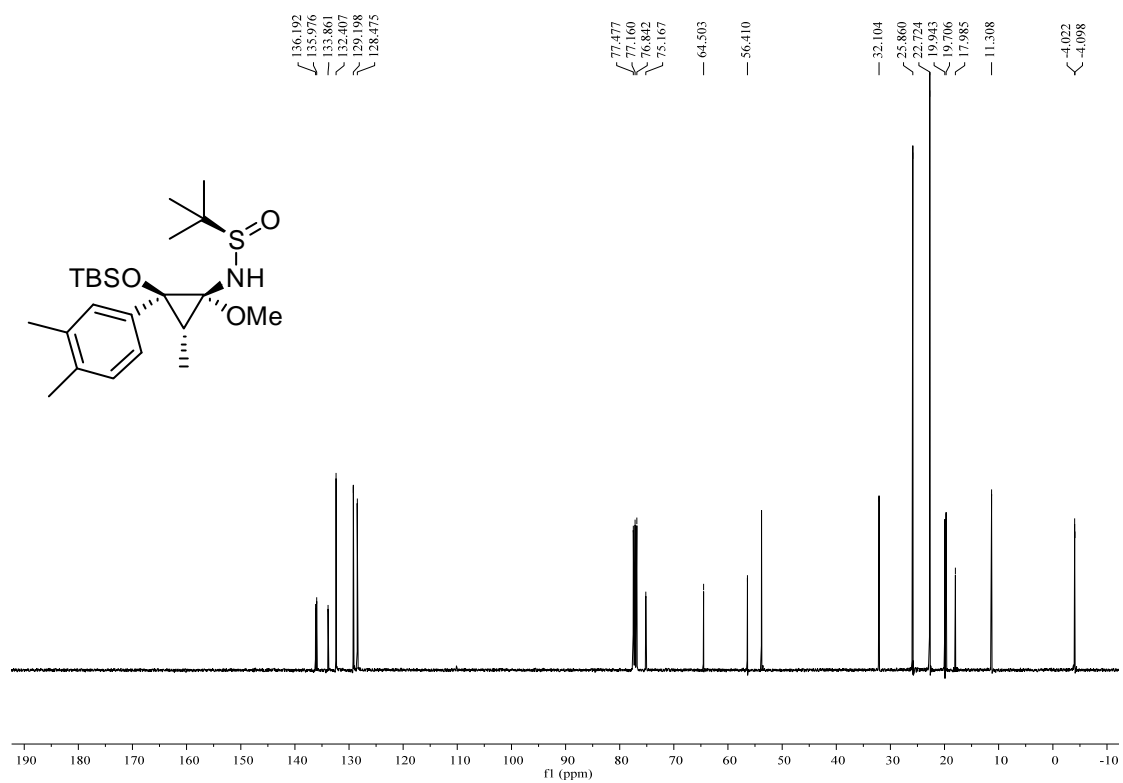

**<sup>13</sup>C NMR spectrum (CDCl<sub>3</sub>, 100 MHz) of **3m****

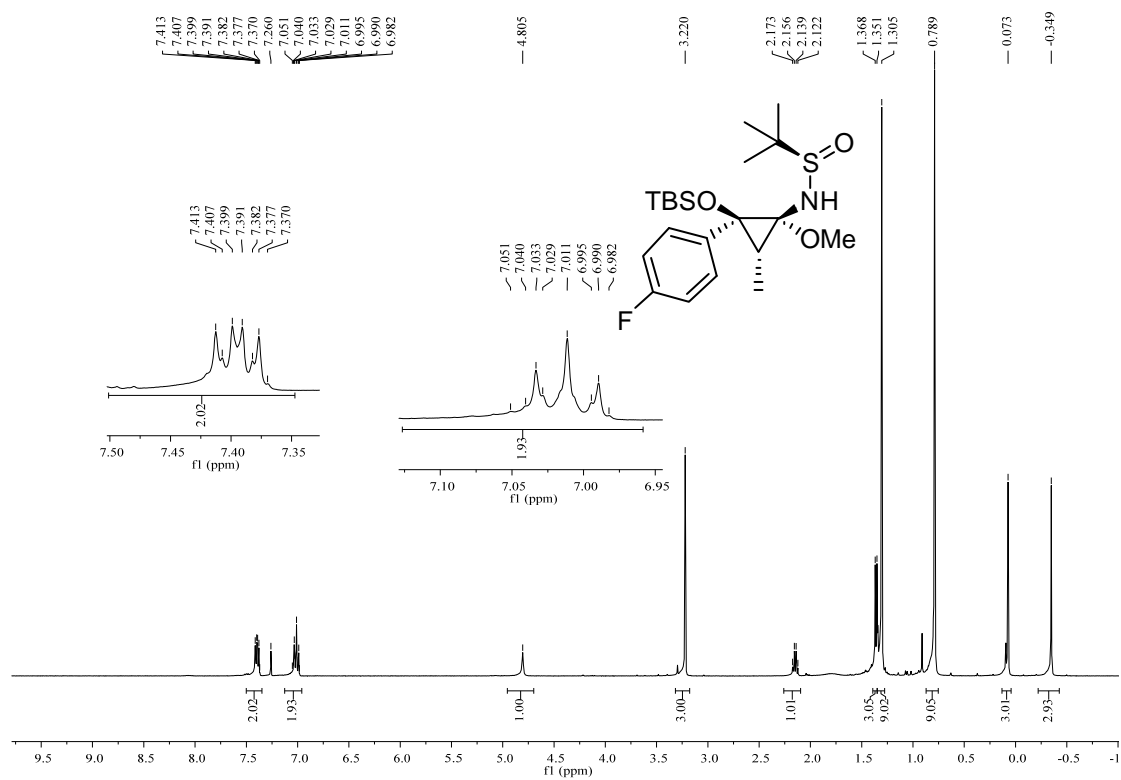

<sup>1</sup>H NMR spectrum (CDCl<sub>3</sub>, 400 MHz) of 3n

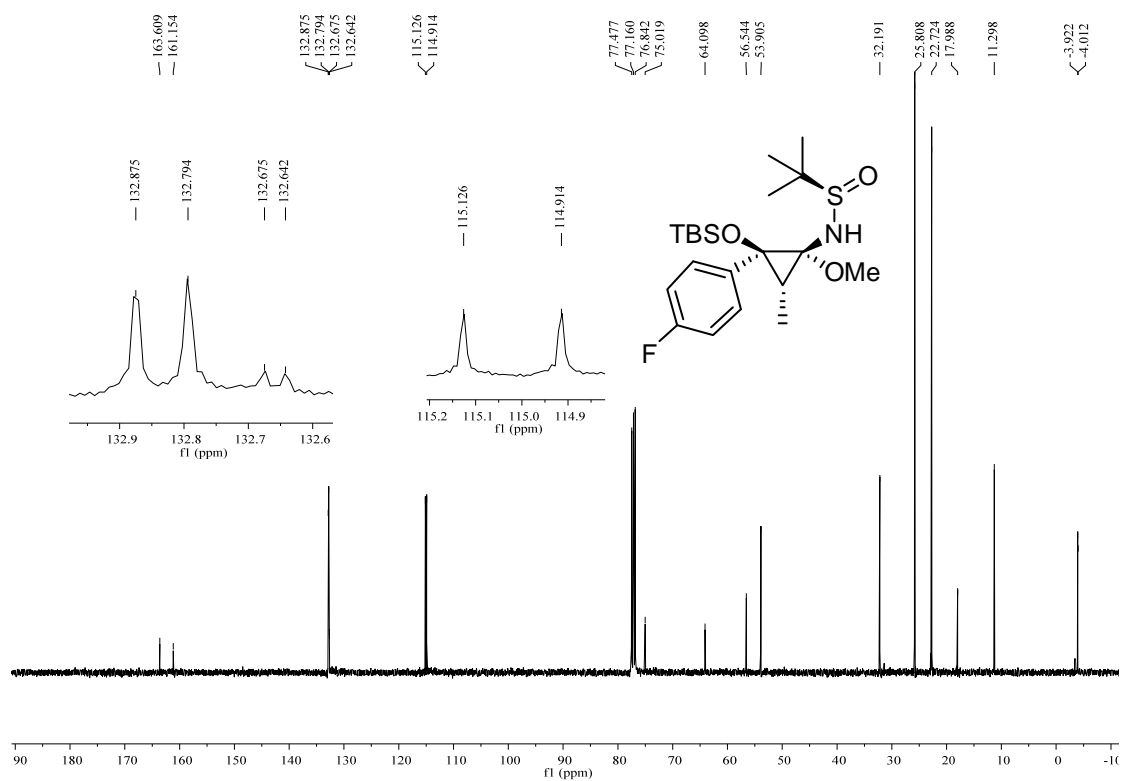

<sup>13</sup>C NMR spectrum (CDCl<sub>3</sub>, 100 MHz) of 3n

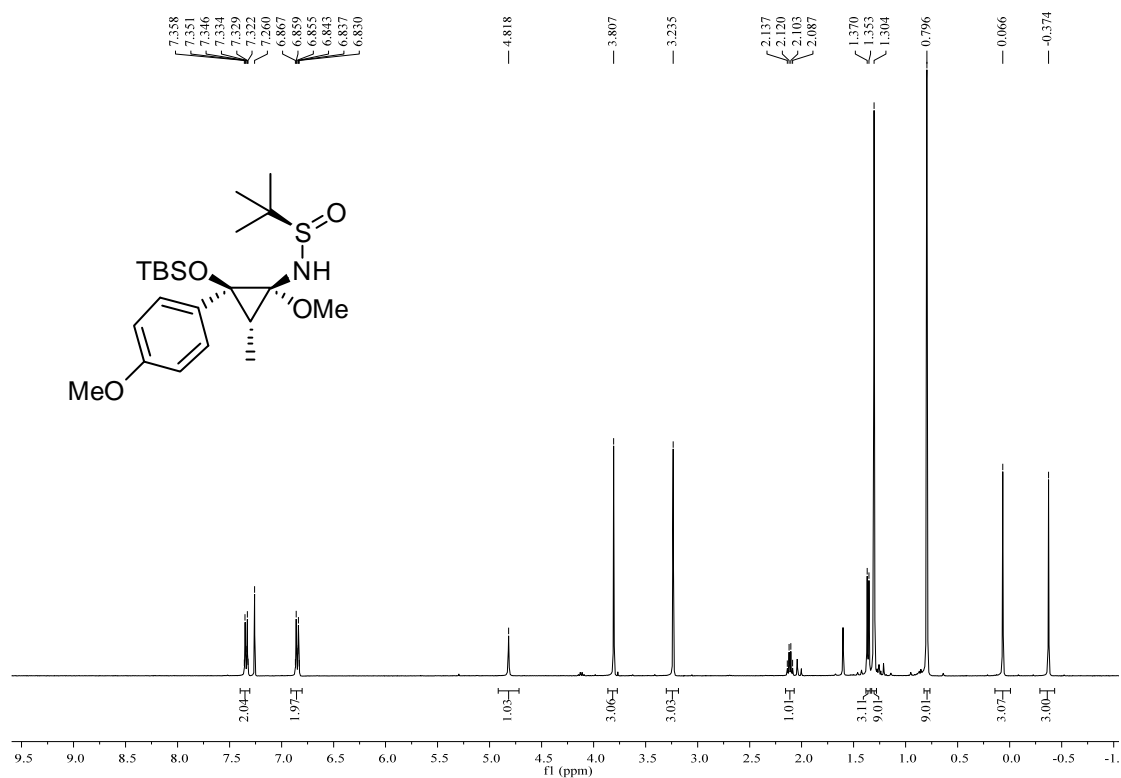

<sup>1</sup>H NMR spectrum (CDCl<sub>3</sub>, 400 MHz) of **3o**

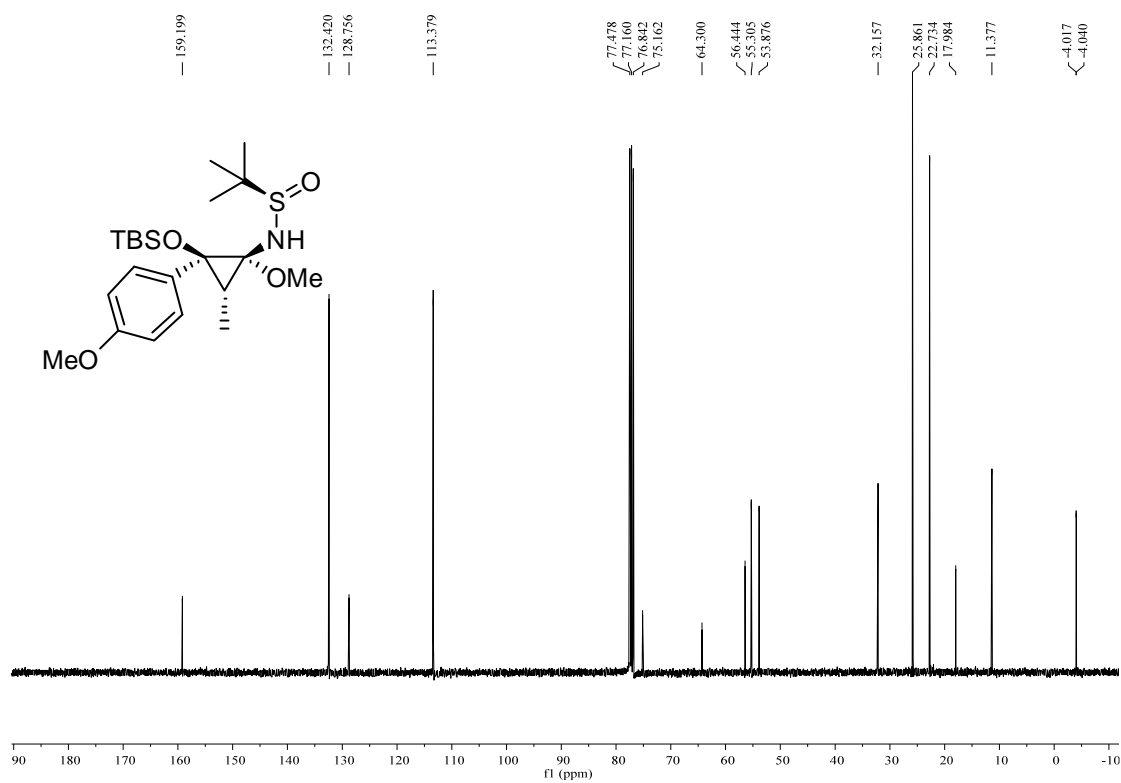

<sup>13</sup>C NMR spectrum (CDCl<sub>3</sub>, 100 MHz) of **3o**

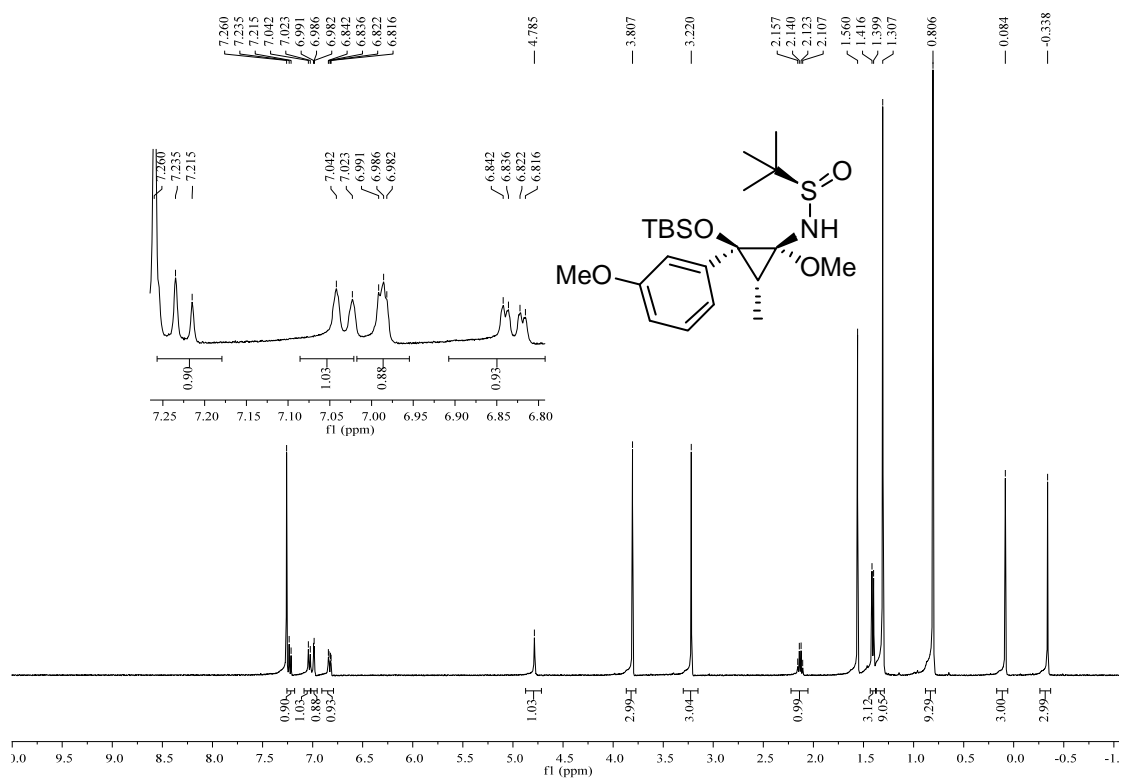

<sup>1</sup>H NMR spectrum (CDCl<sub>3</sub>, 400 MHz) of **3p** (major diastereomer)

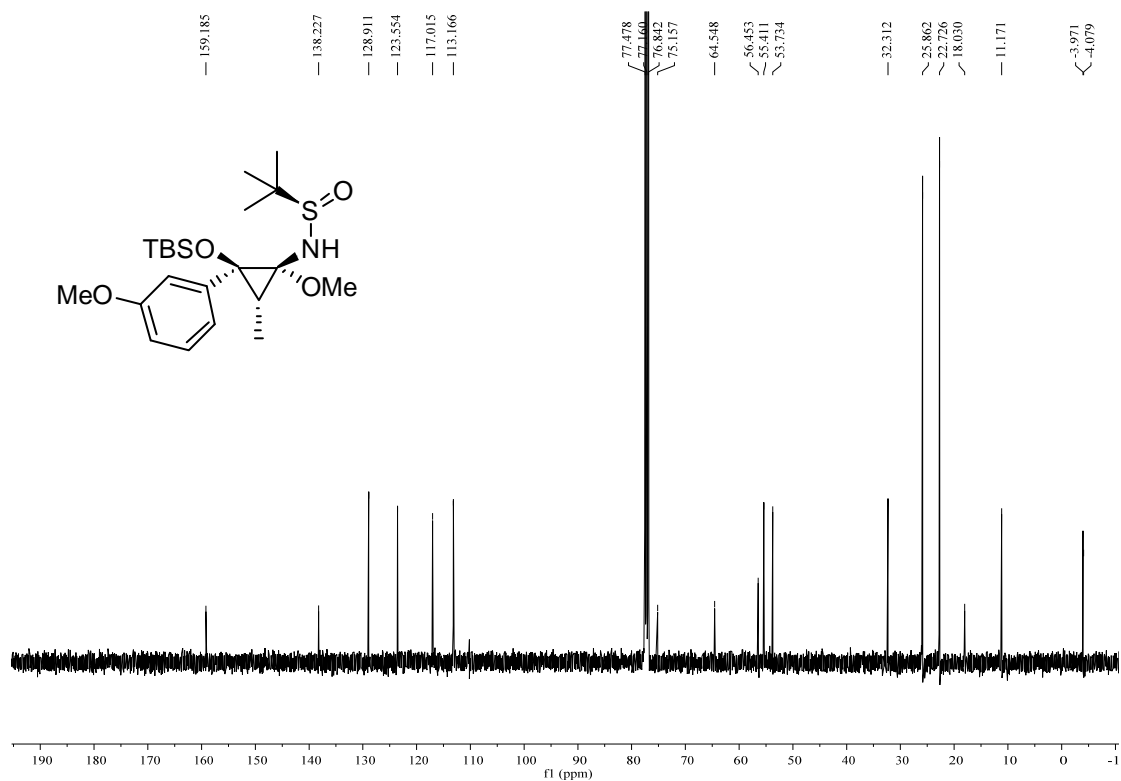

<sup>13</sup>C NMR spectrum (CDCl<sub>3</sub>, 100 MHz) of **3p** (major diastereomer)

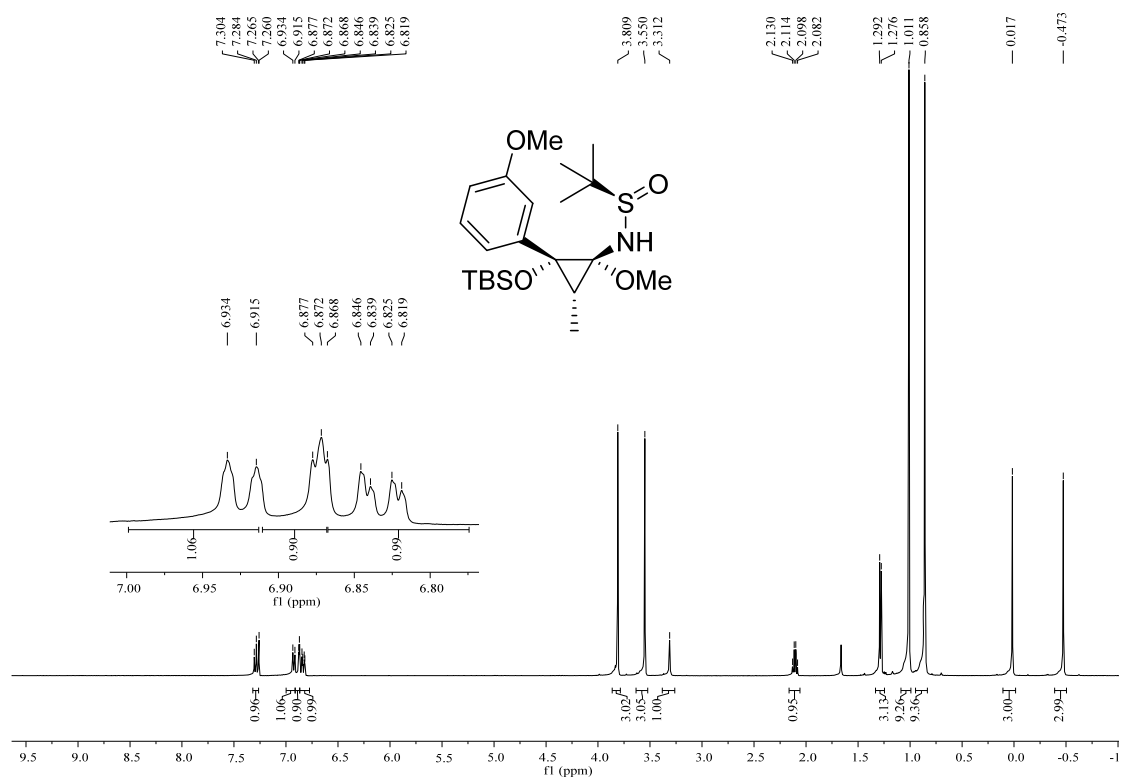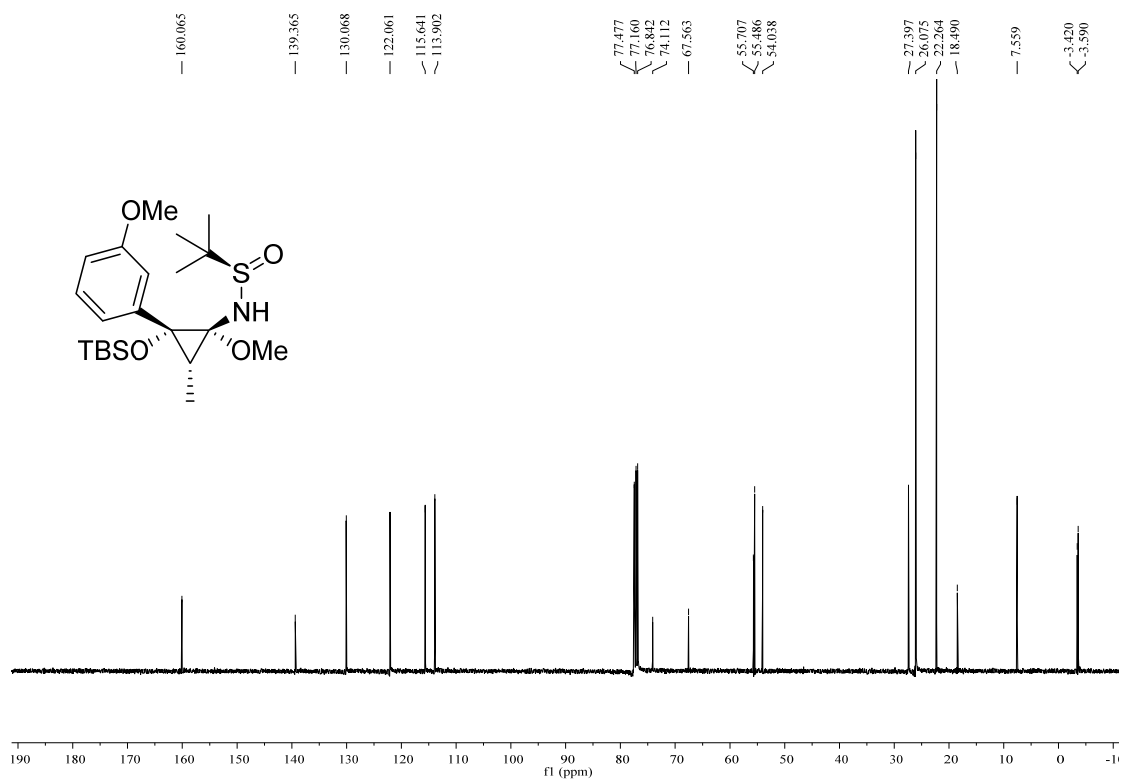

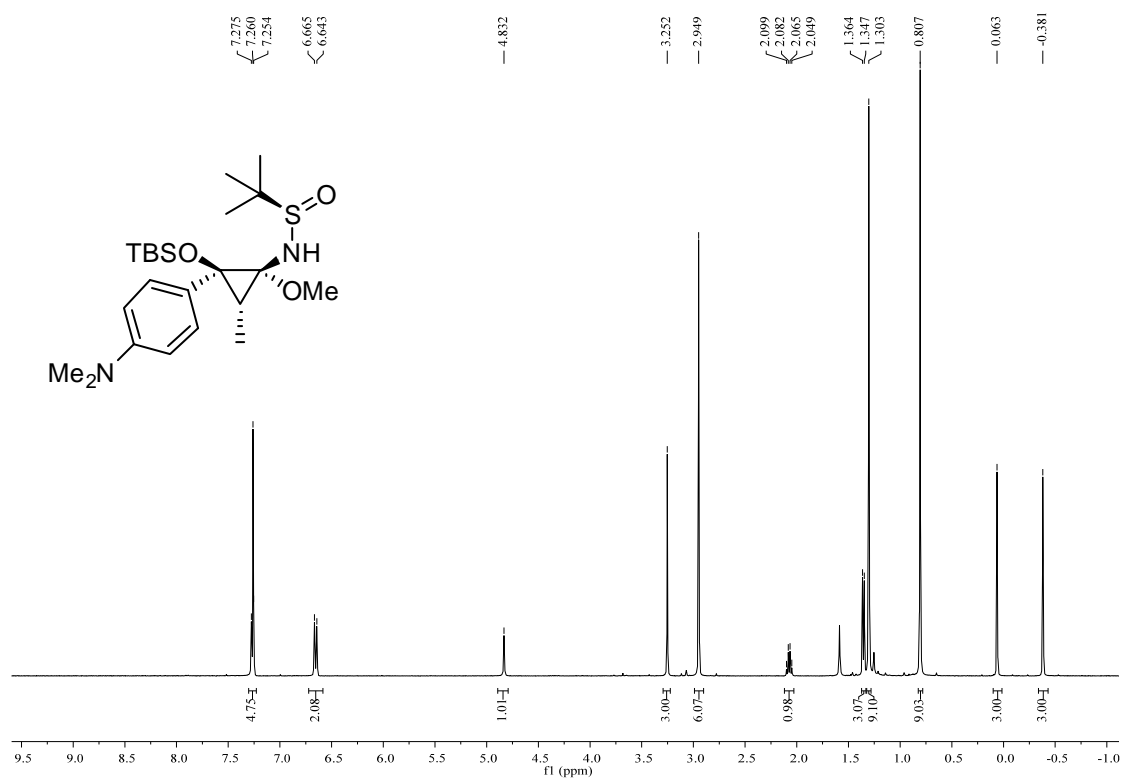

<sup>1</sup>H NMR spectrum (CDCl<sub>3</sub>, 400 MHz) of **3q**

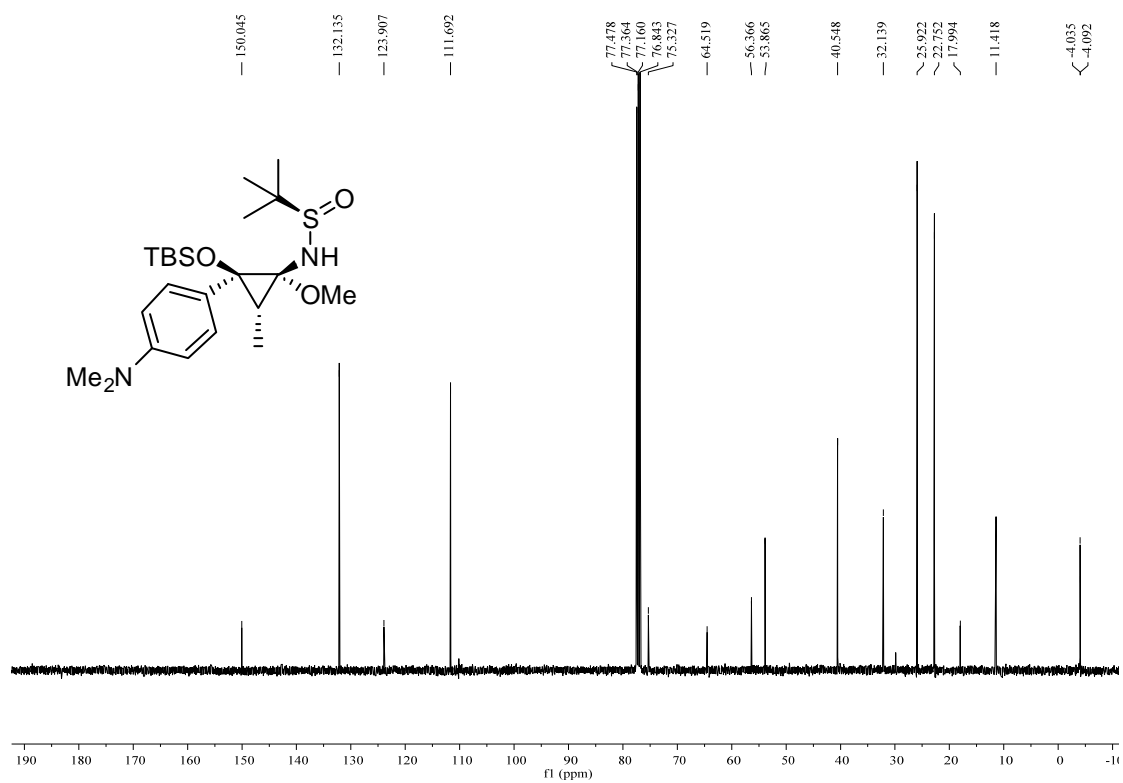

<sup>13</sup>C NMR spectrum (CDCl<sub>3</sub>, 100 MHz) of **3q**

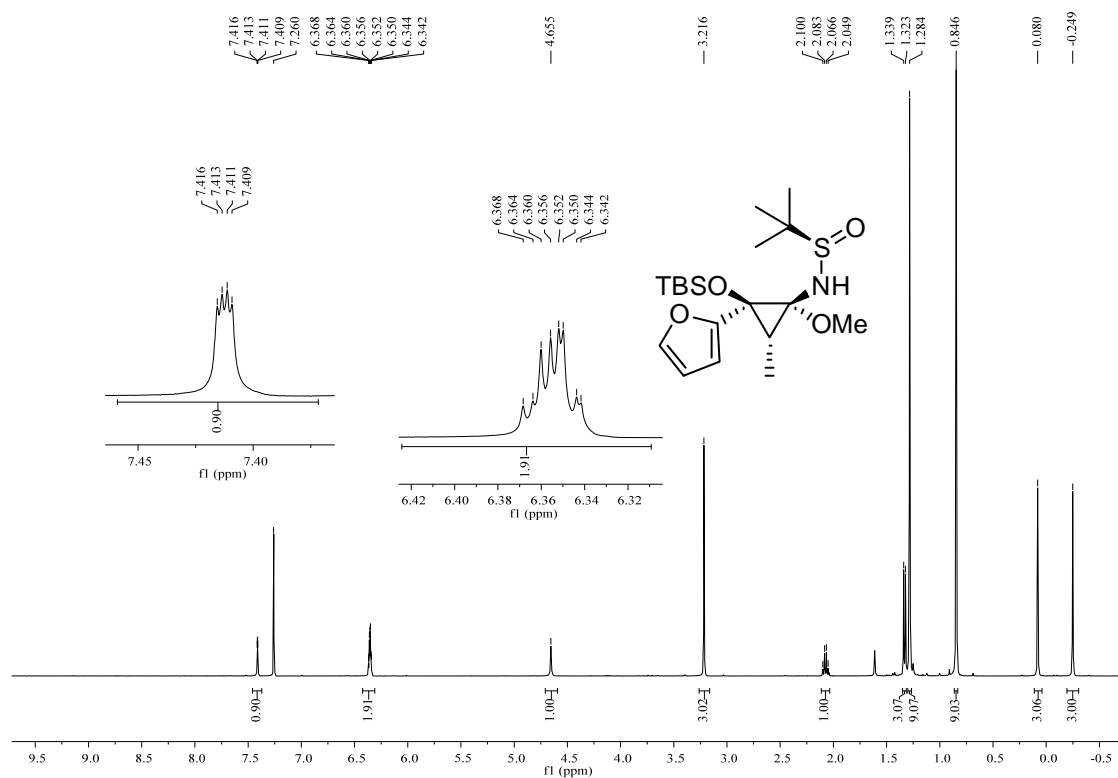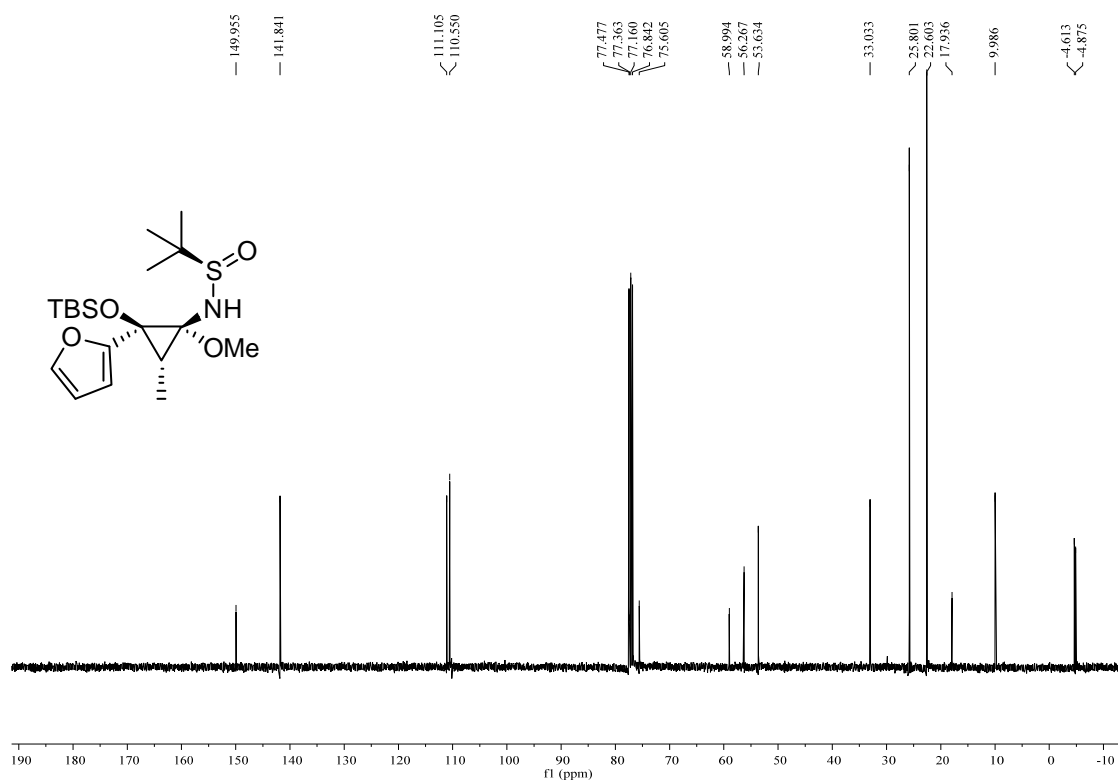



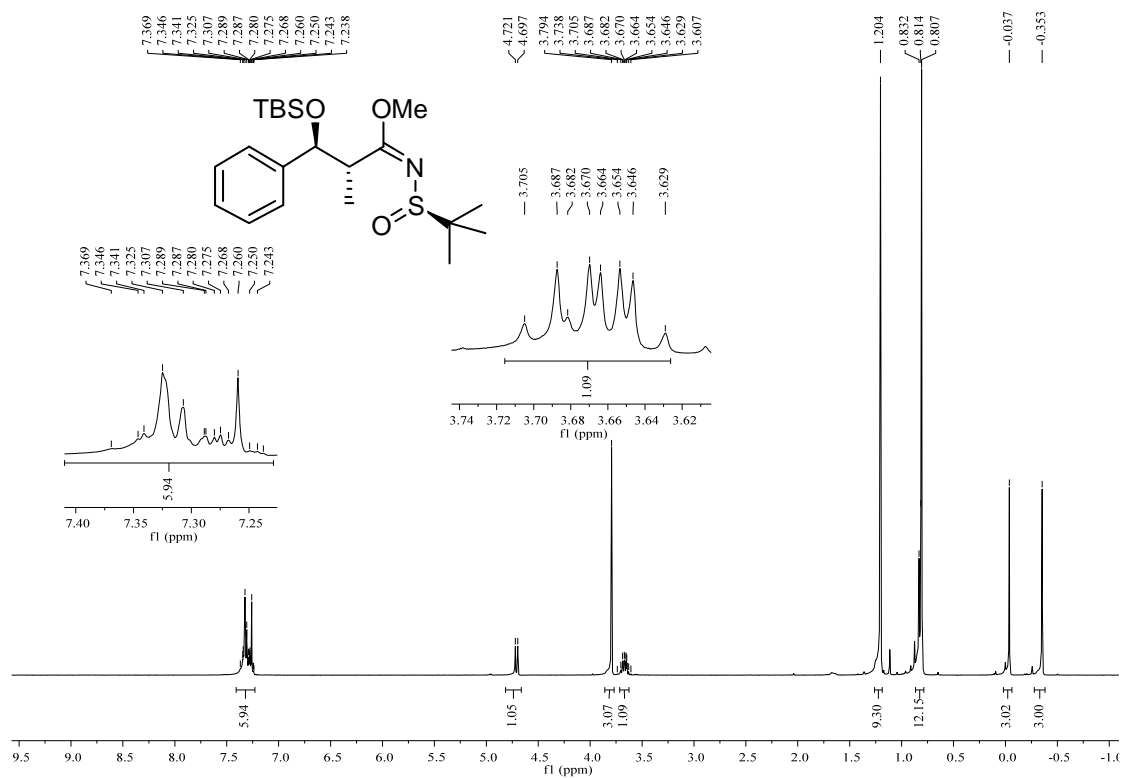

**<sup>1</sup>H NMR spectrum (CDCl<sub>3</sub>, 400 MHz) of **5a****

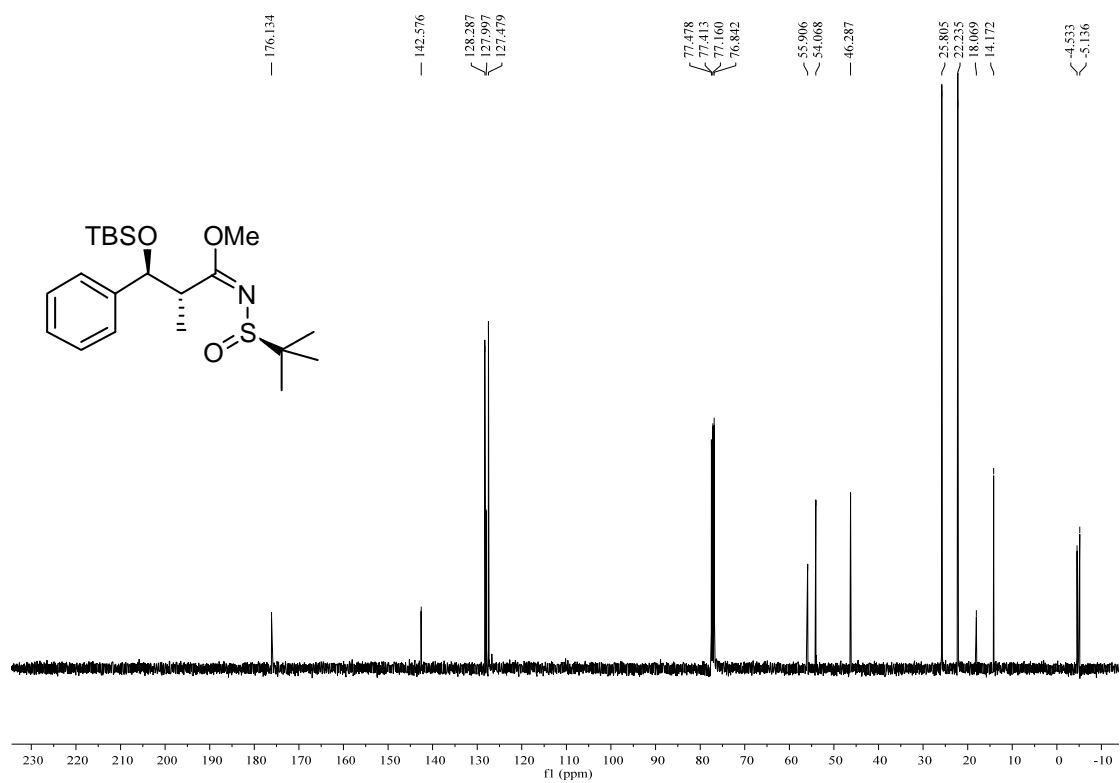

**<sup>13</sup>C NMR spectrum (CDCl<sub>3</sub>, 100 MHz) of **5a****

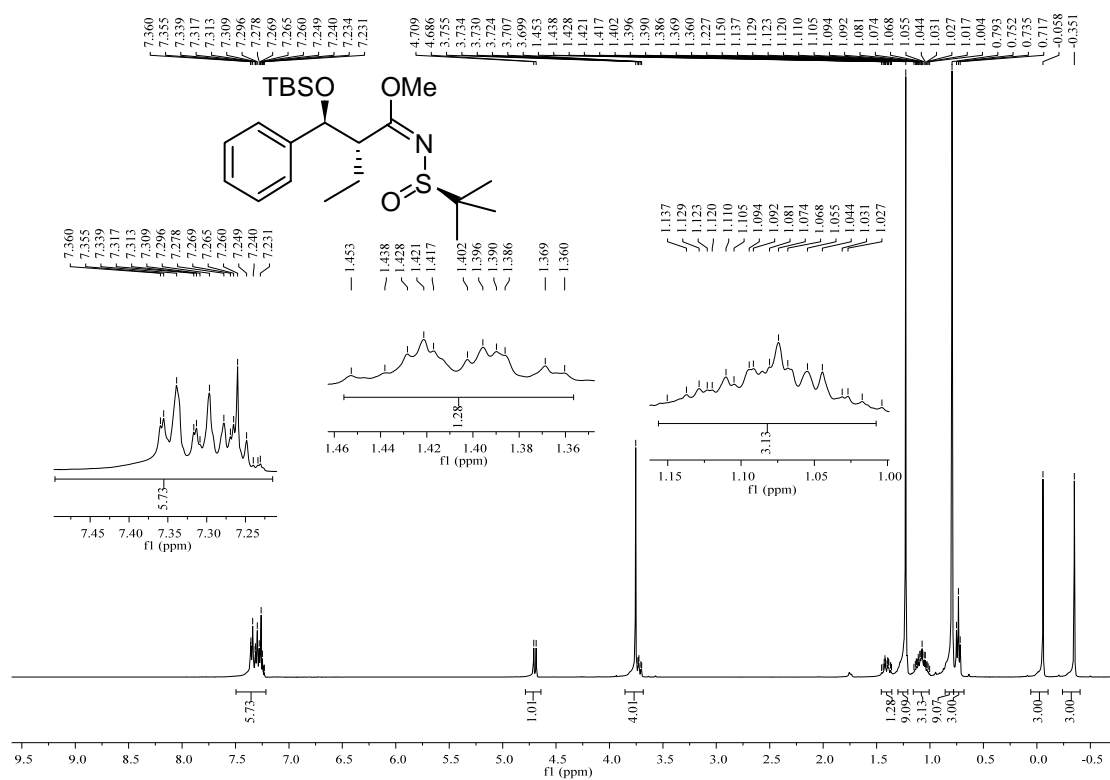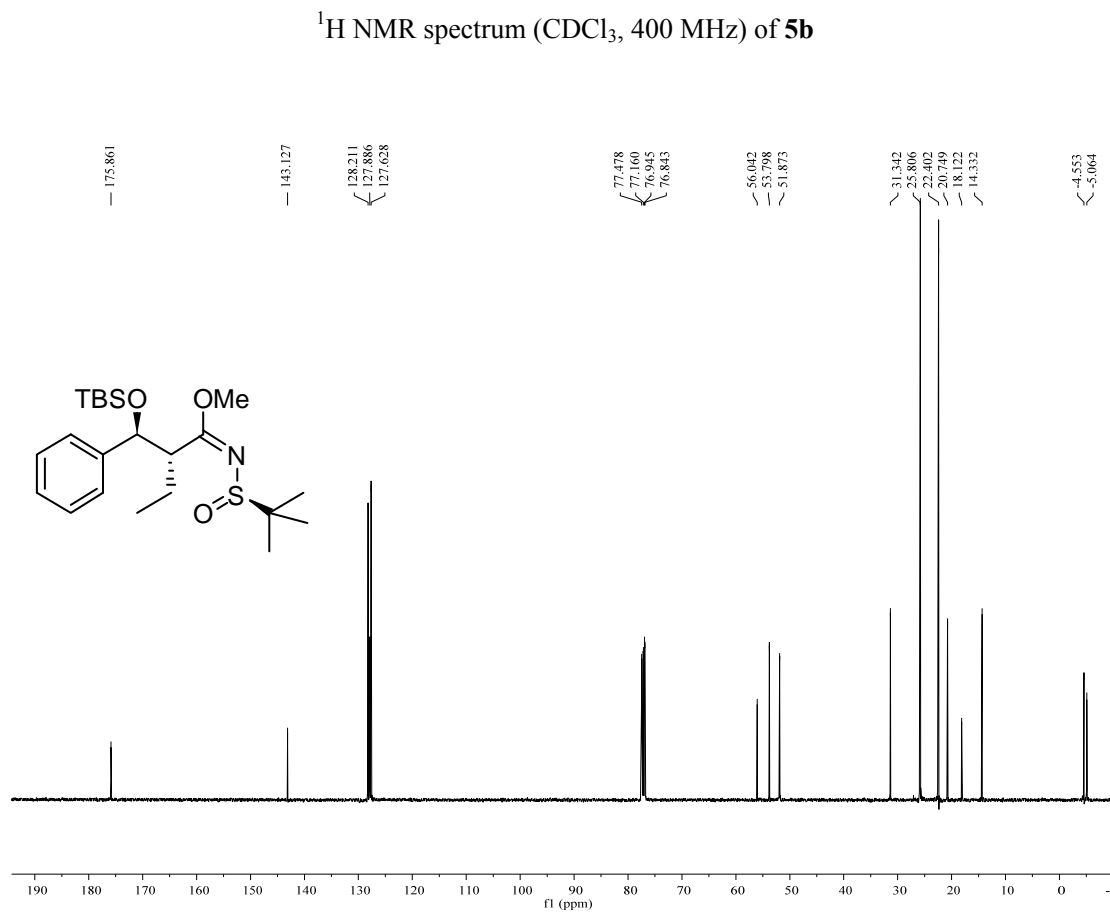

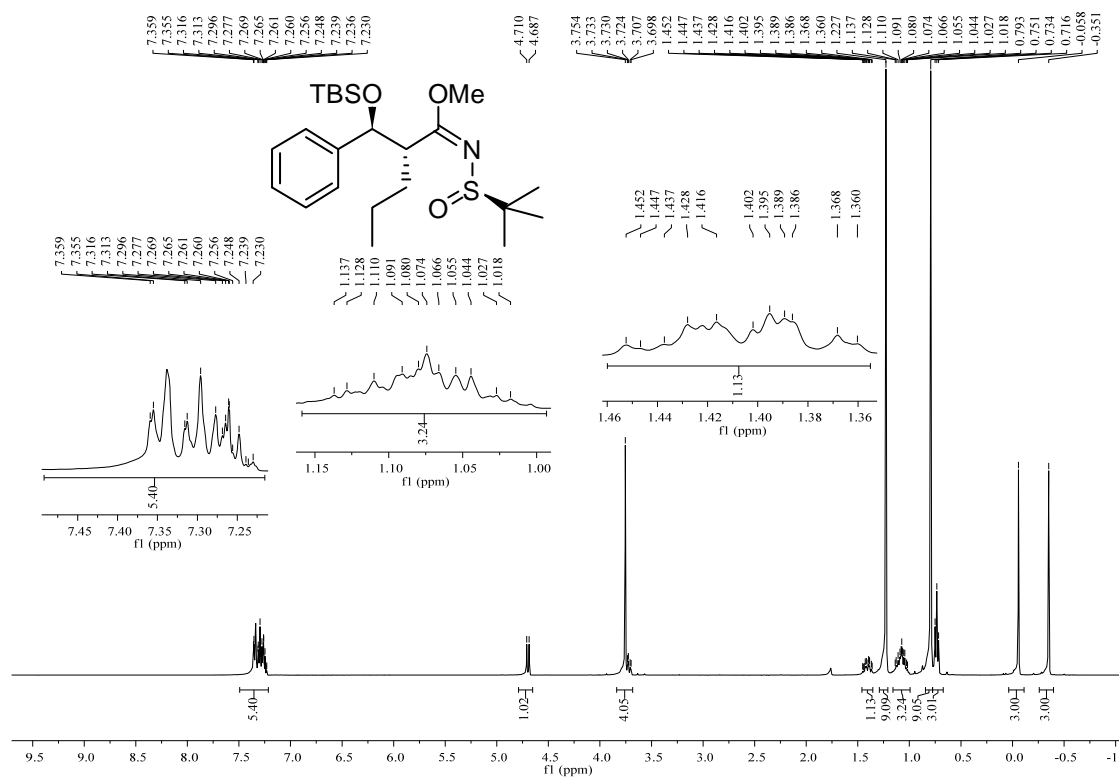

<sup>1</sup>H NMR spectrum (CDCl<sub>3</sub>, 400 MHz) of 5c

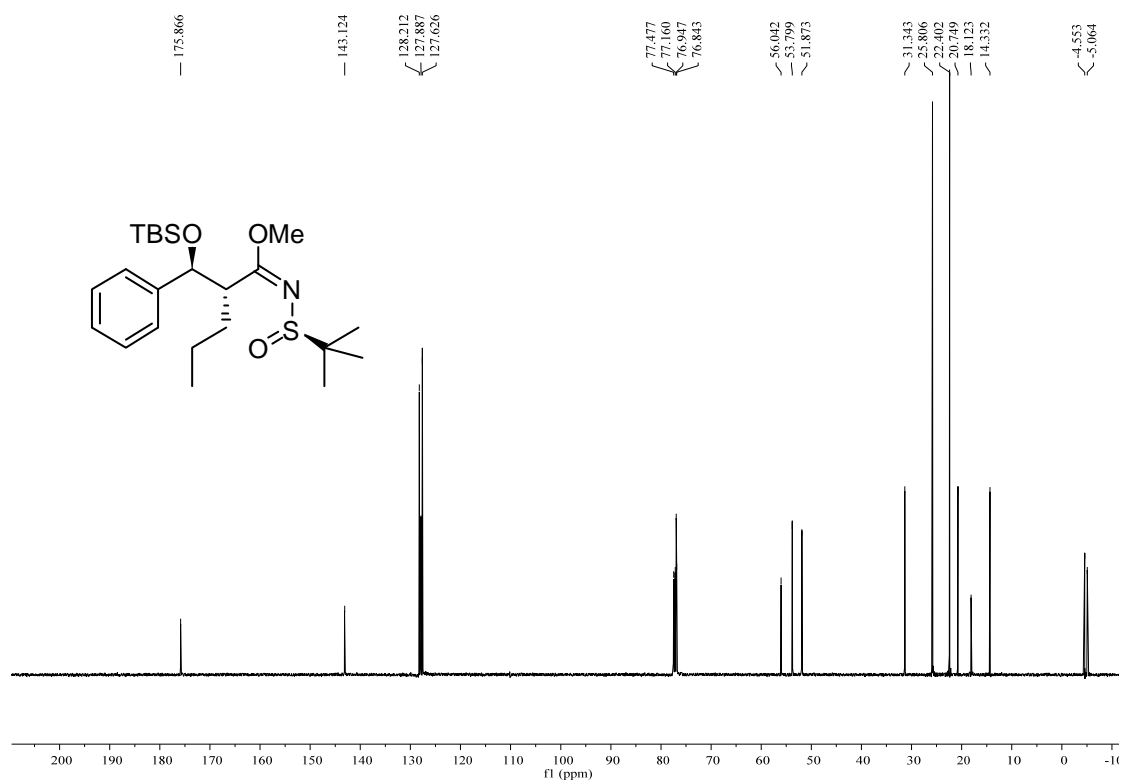

<sup>13</sup>C NMR spectrum (CDCl<sub>3</sub>, 100 MHz) of 5c

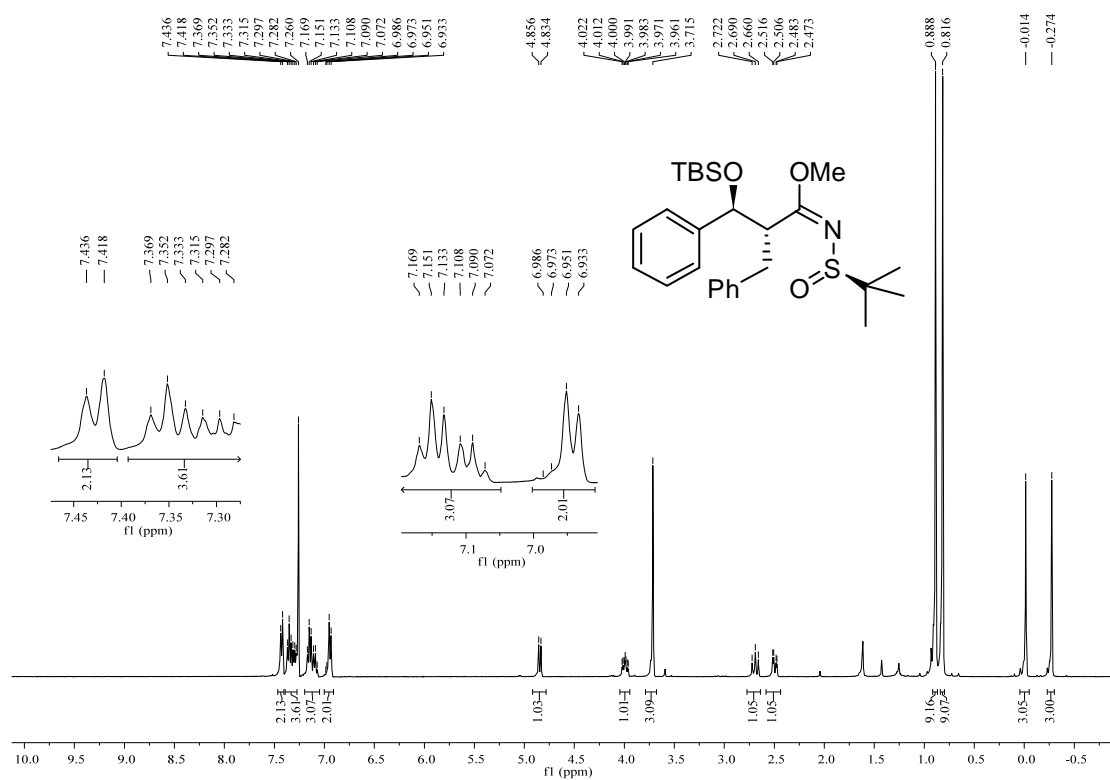

**<sup>1</sup>H NMR spectrum (CDCl<sub>3</sub>, 400 MHz) of **5d****

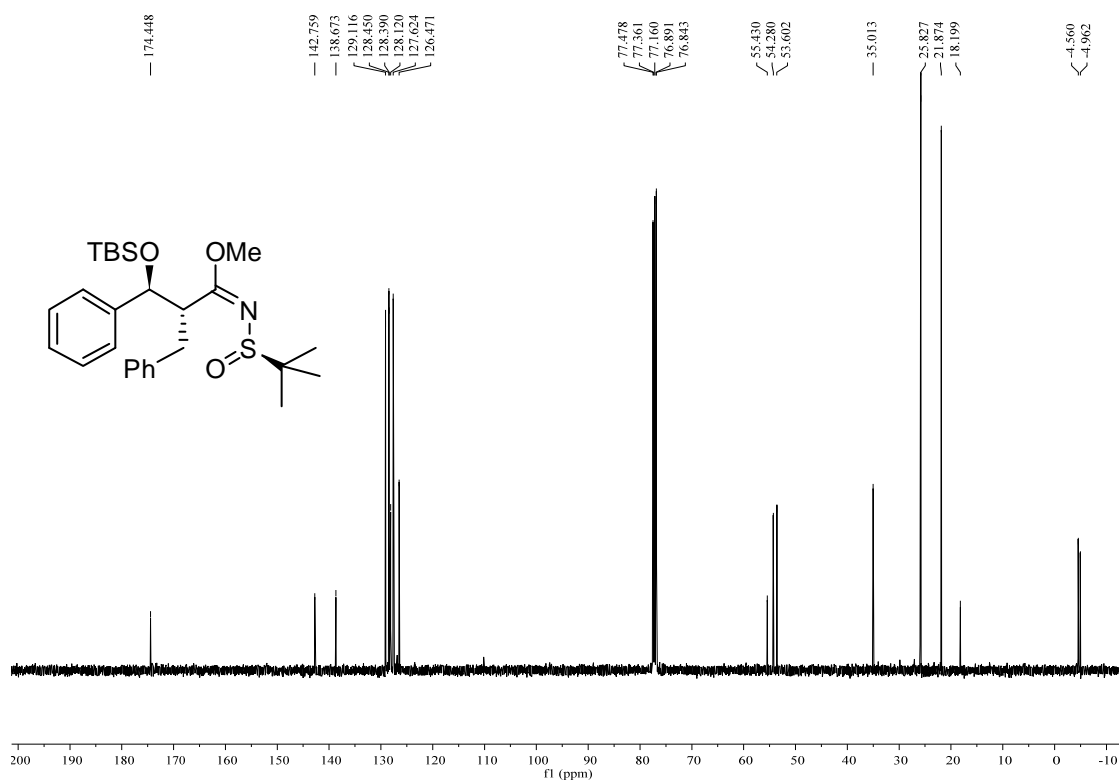

**<sup>13</sup>C NMR spectrum (CDCl<sub>3</sub>, 100 MHz) of **5d****

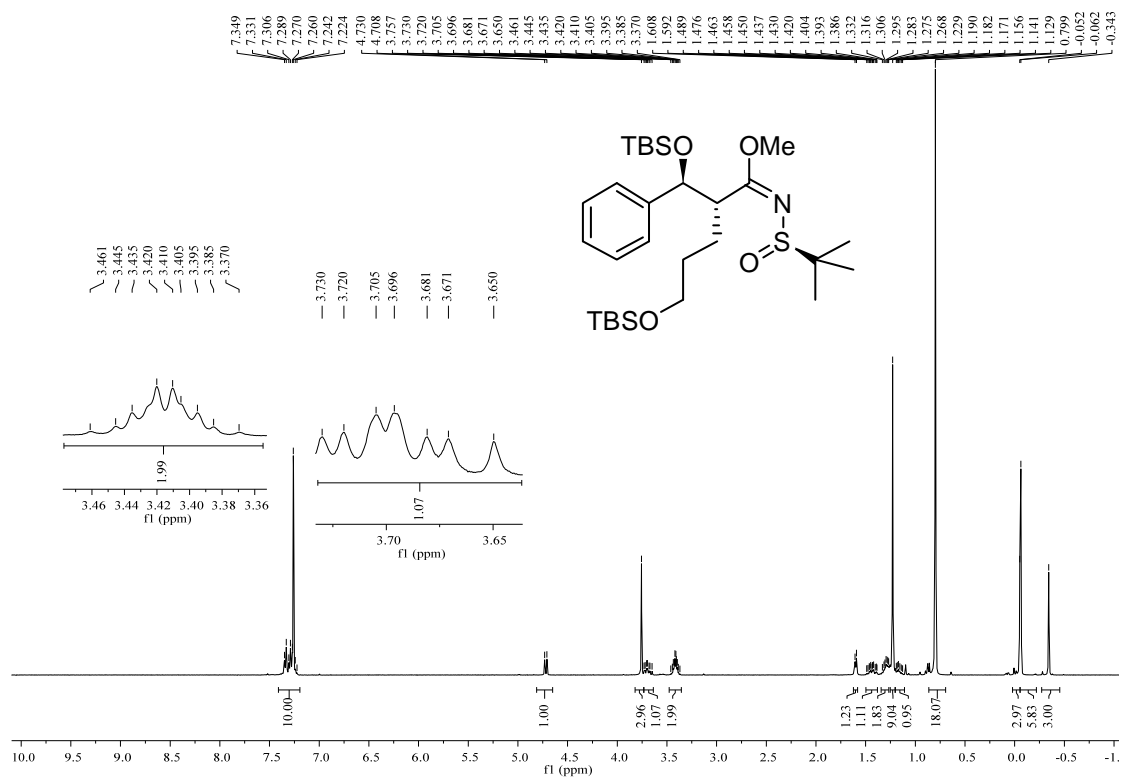

<sup>1</sup>H NMR spectrum (CDCl<sub>3</sub>, 400 MHz) of 5e

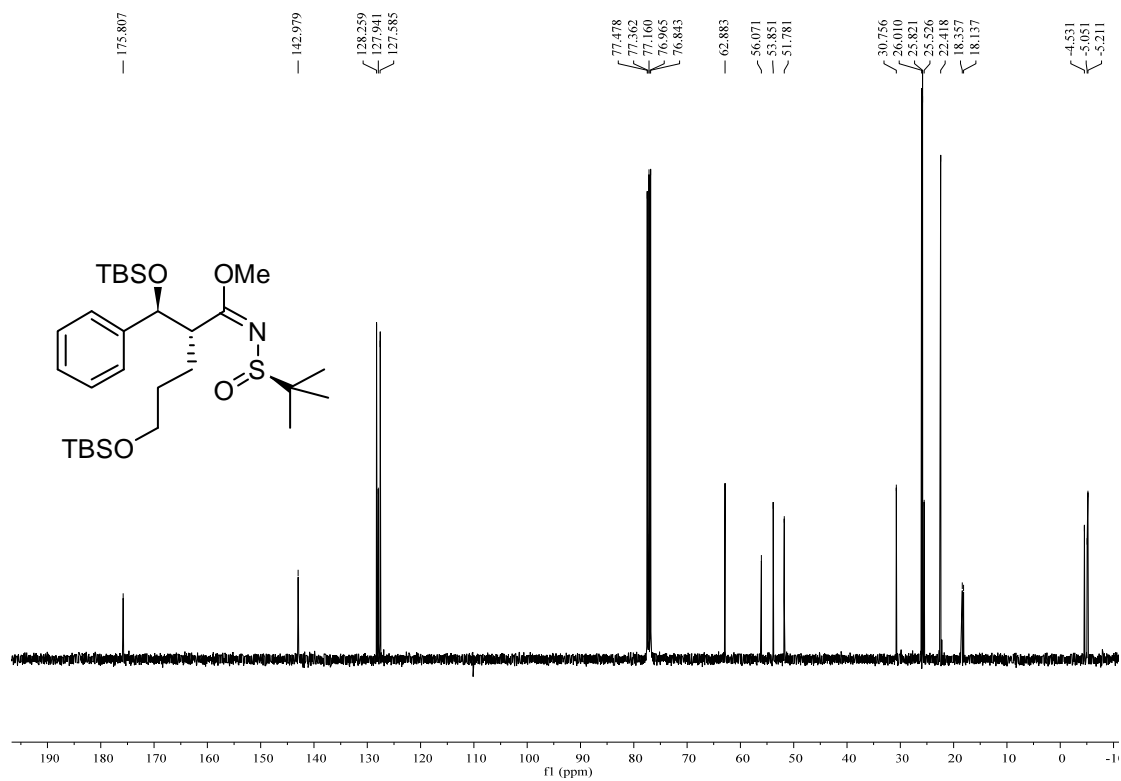

<sup>13</sup>C NMR spectrum (CDCl<sub>3</sub>, 100 MHz) of 5e

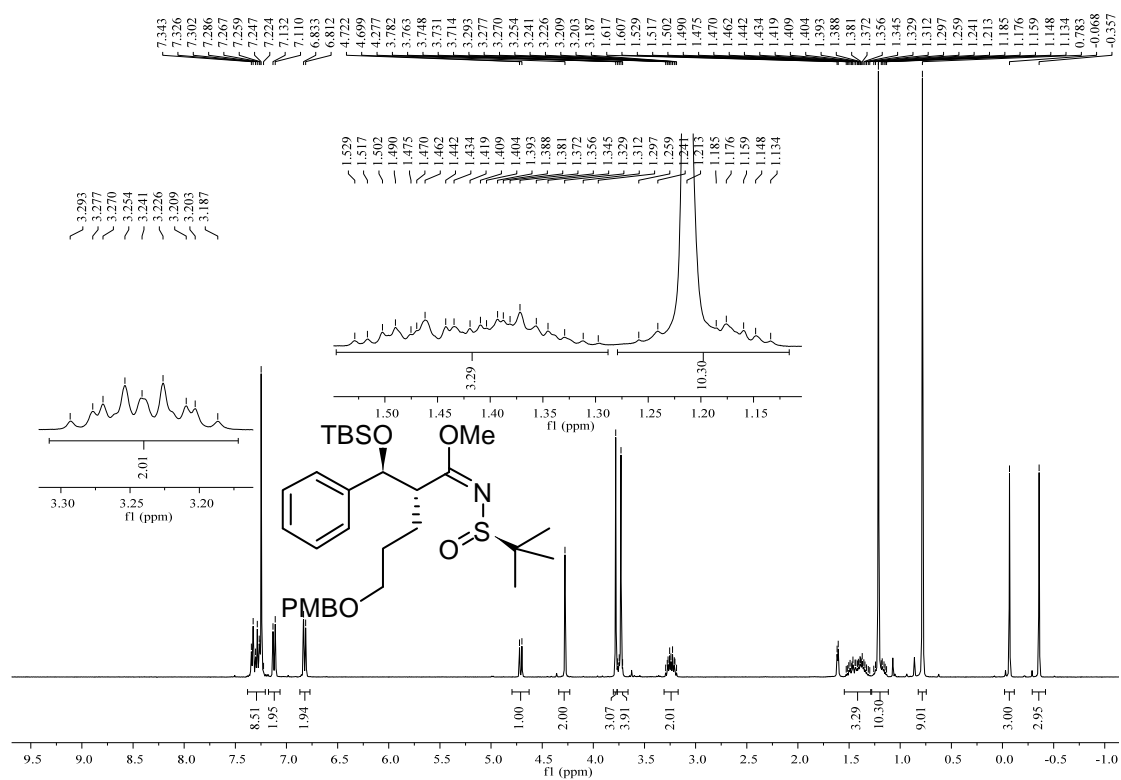

$^1\text{H NMR}$  spectrum ( $\text{CDCl}_3$ , 400 MHz) of **5f**

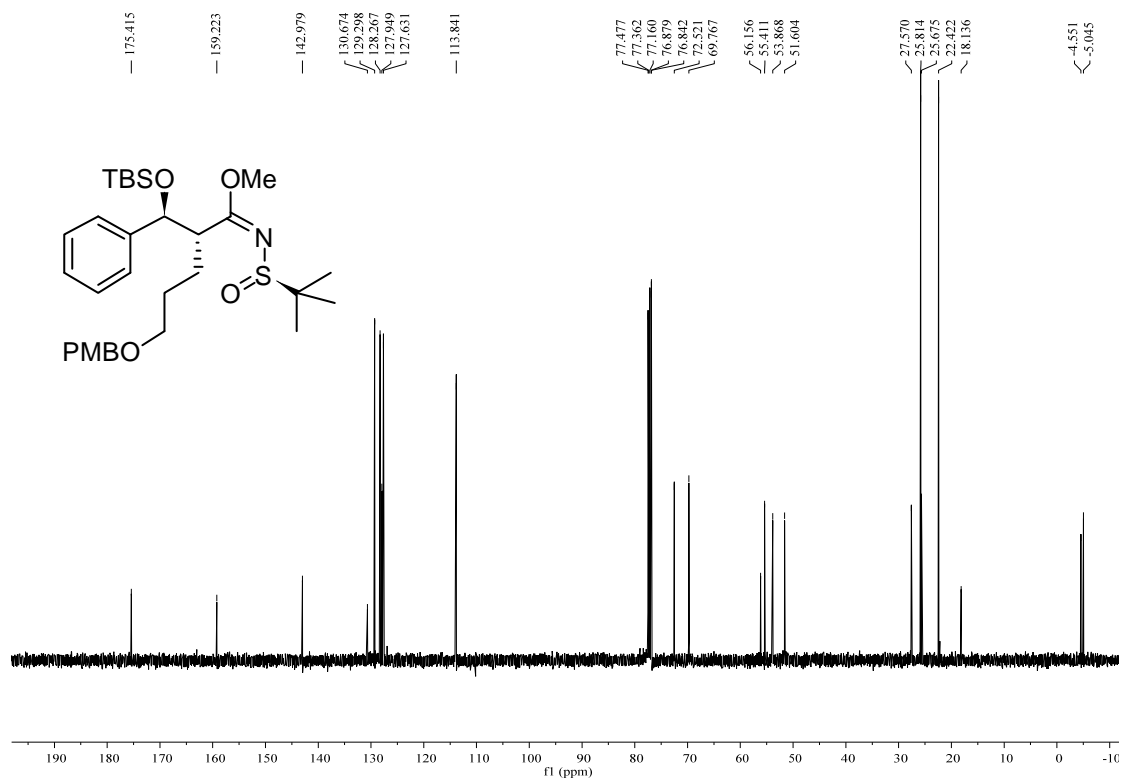

$^{13}\text{C NMR}$  spectrum ( $\text{CDCl}_3$ , 100 MHz) of **5f**

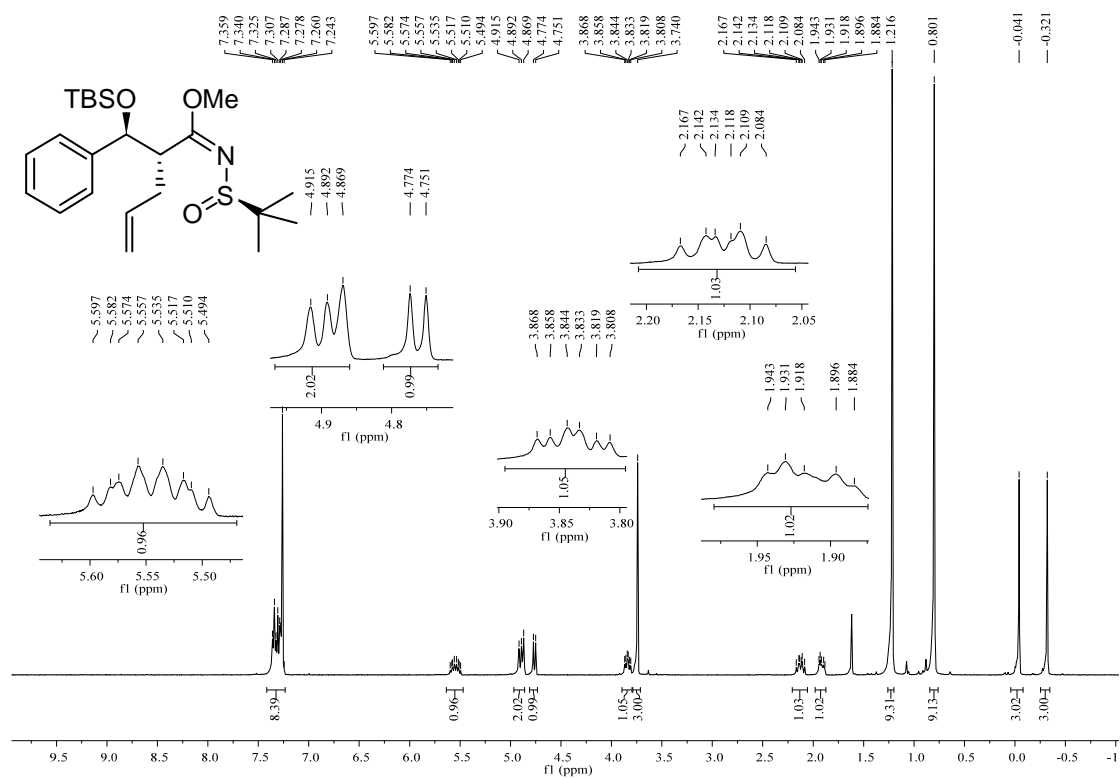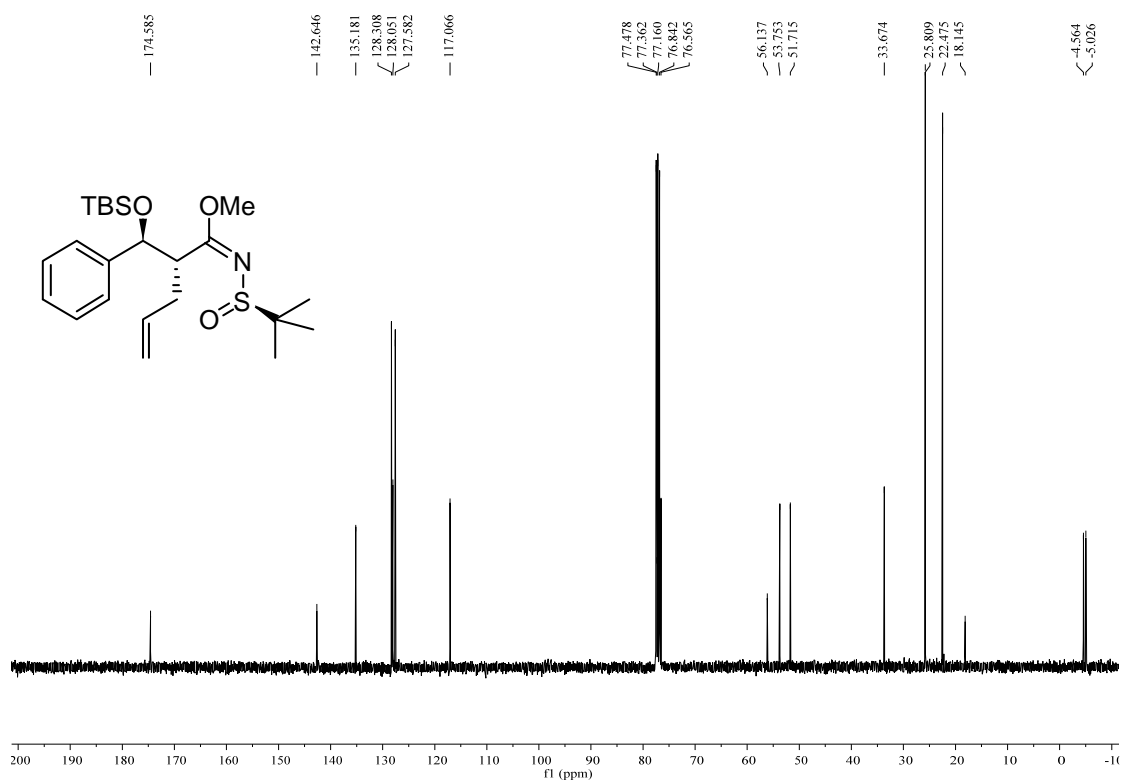





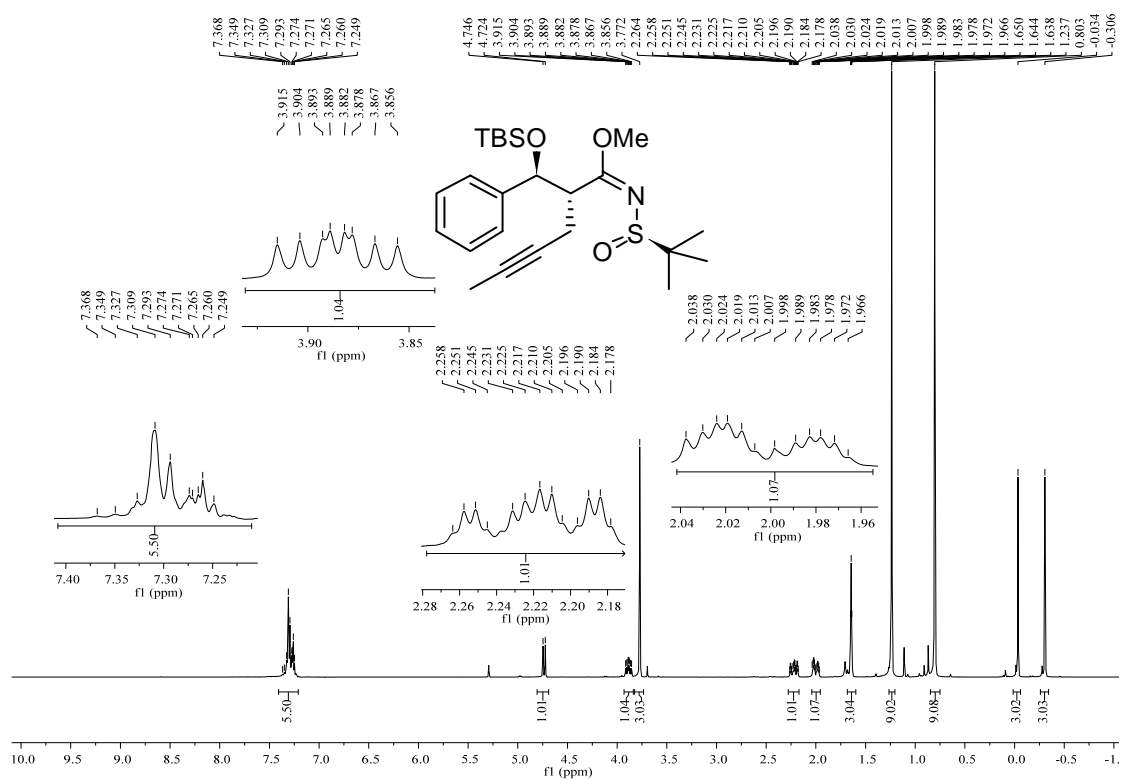

**<sup>1</sup>H NMR spectrum (CDCl<sub>3</sub>, 400 MHz) of **5i****

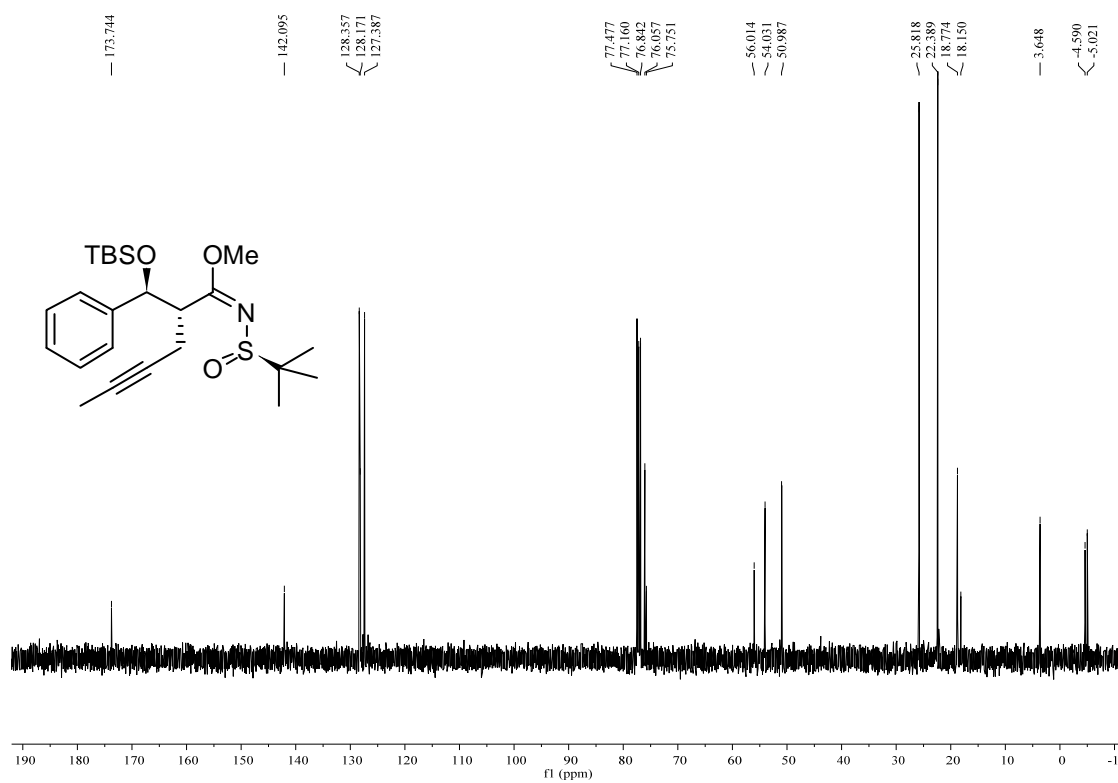

**<sup>13</sup>C NMR spectrum (CDCl<sub>3</sub>, 100 MHz) of **5i****

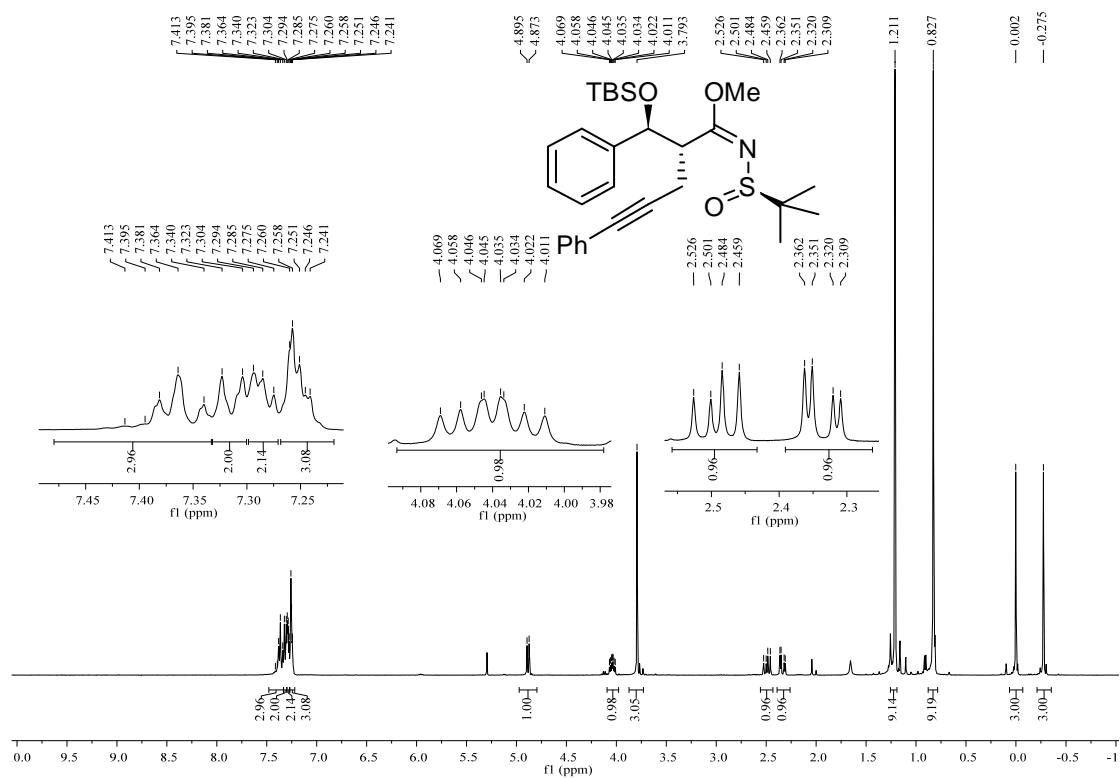

**<sup>1</sup>H NMR spectrum (CDCl<sub>3</sub>, 400 MHz) of **5j****

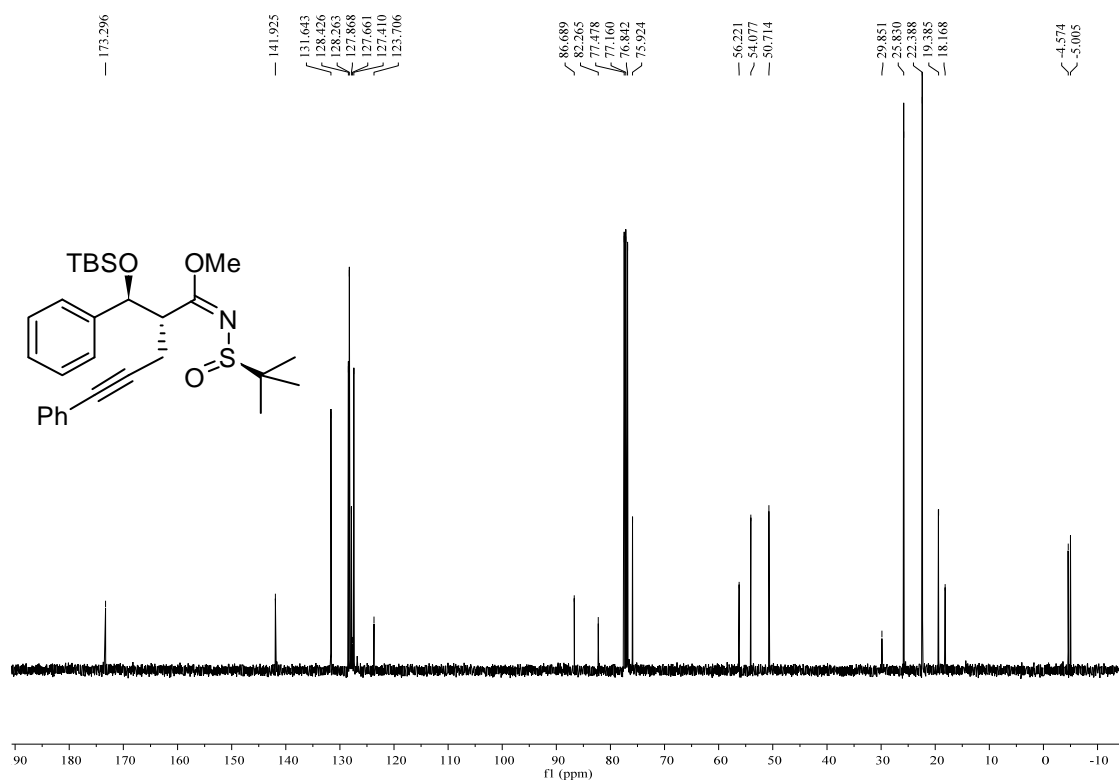

**<sup>13</sup>C NMR spectrum (CDCl<sub>3</sub>, 100 MHz) of **5j****

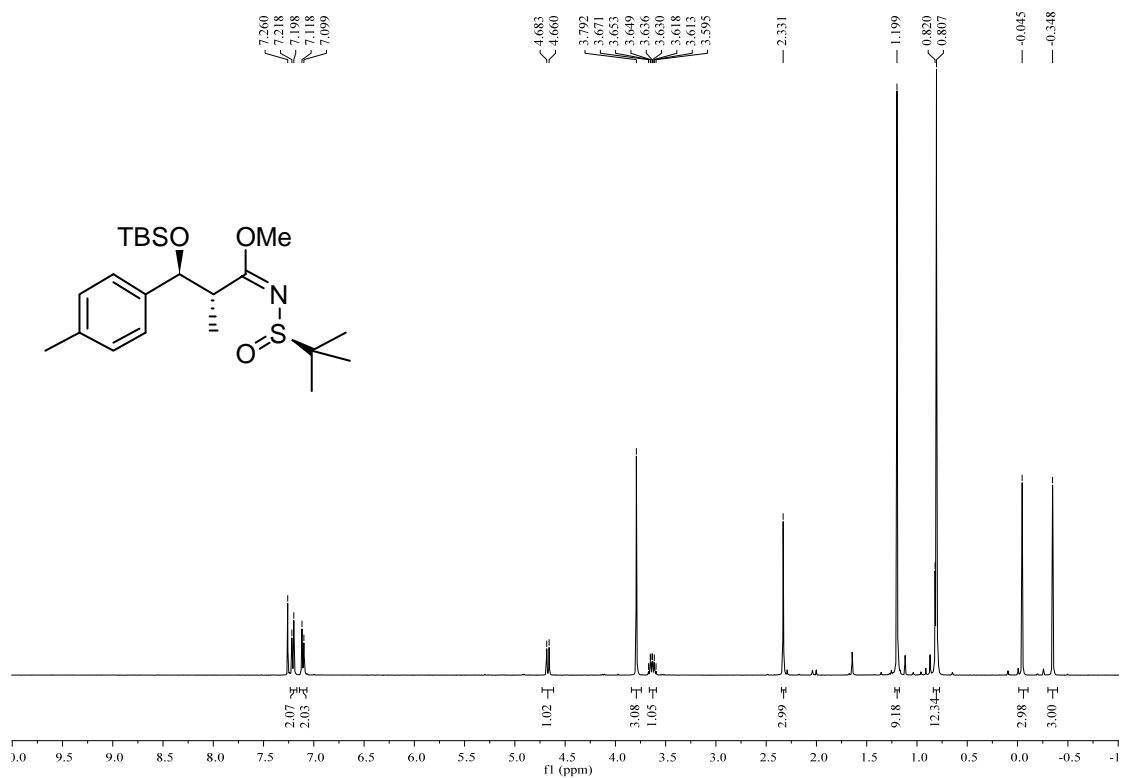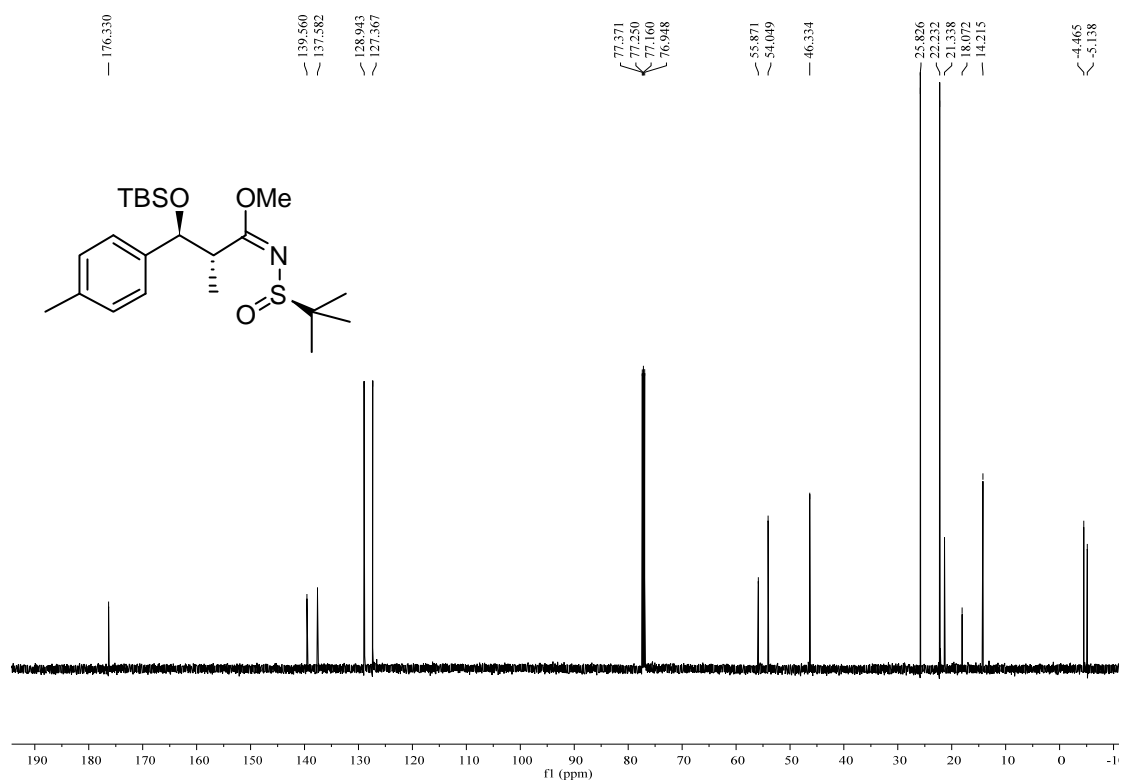

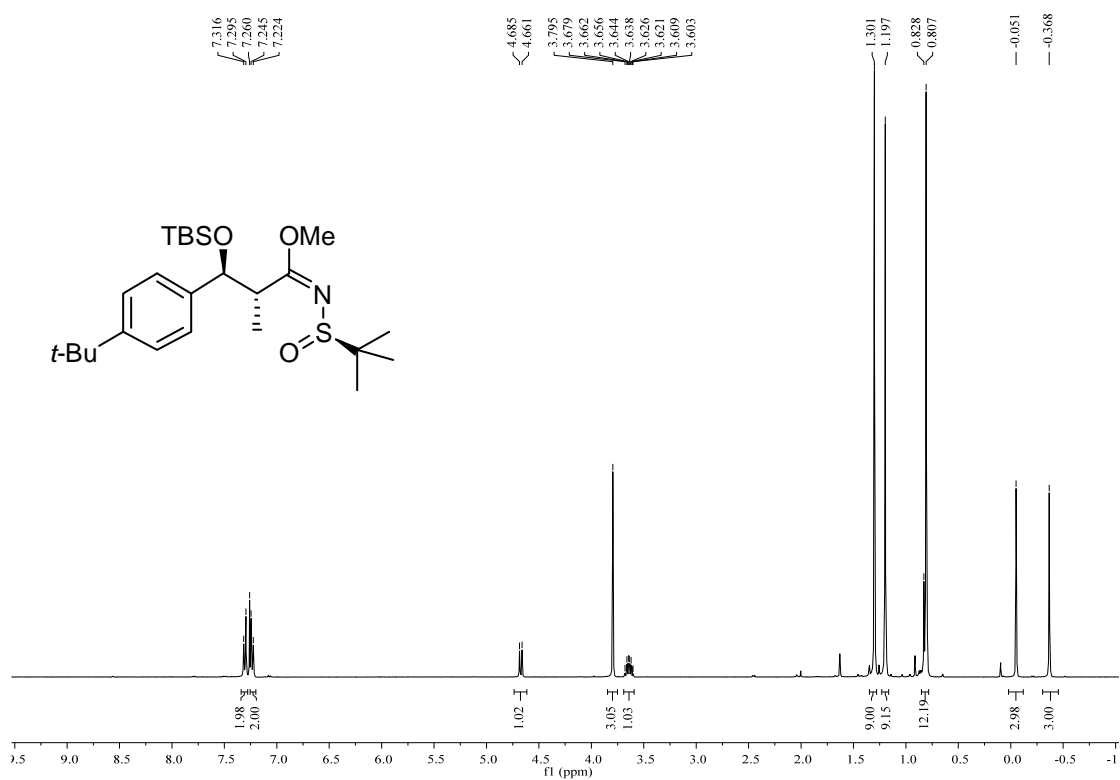

<sup>1</sup>H NMR spectrum (CDCl<sub>3</sub>, 400 MHz) of **51**

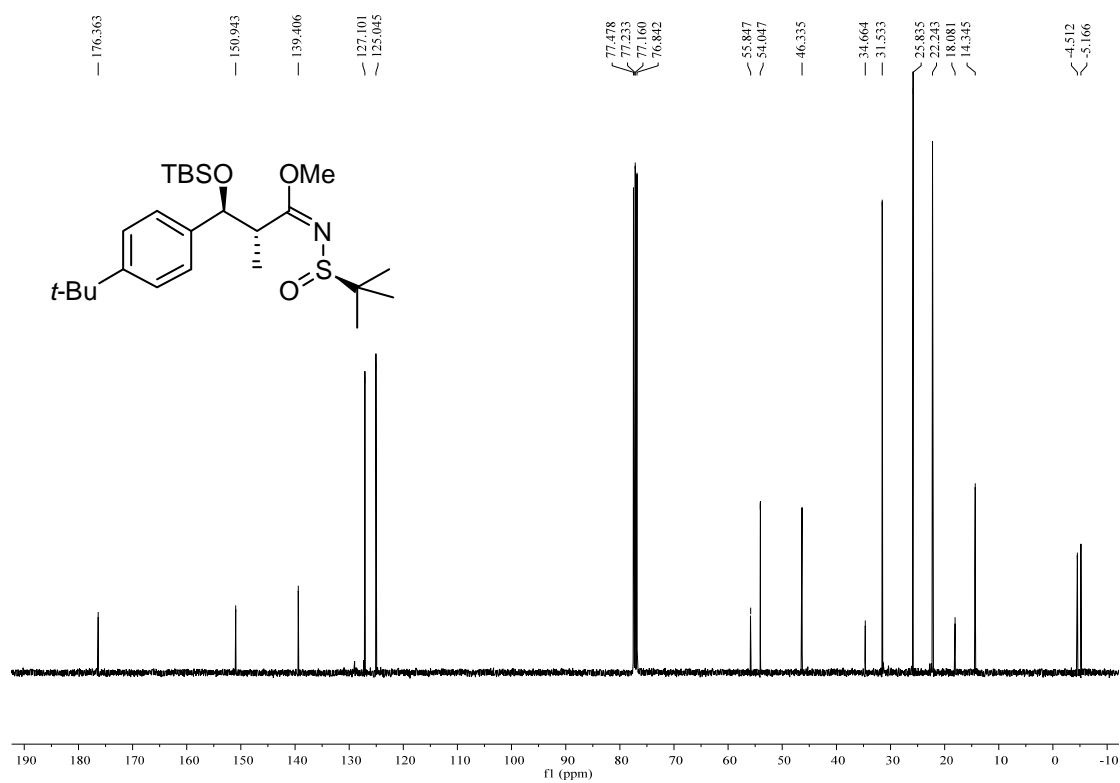

<sup>13</sup>C NMR spectrum (CDCl<sub>3</sub>, 100 MHz) of **51**

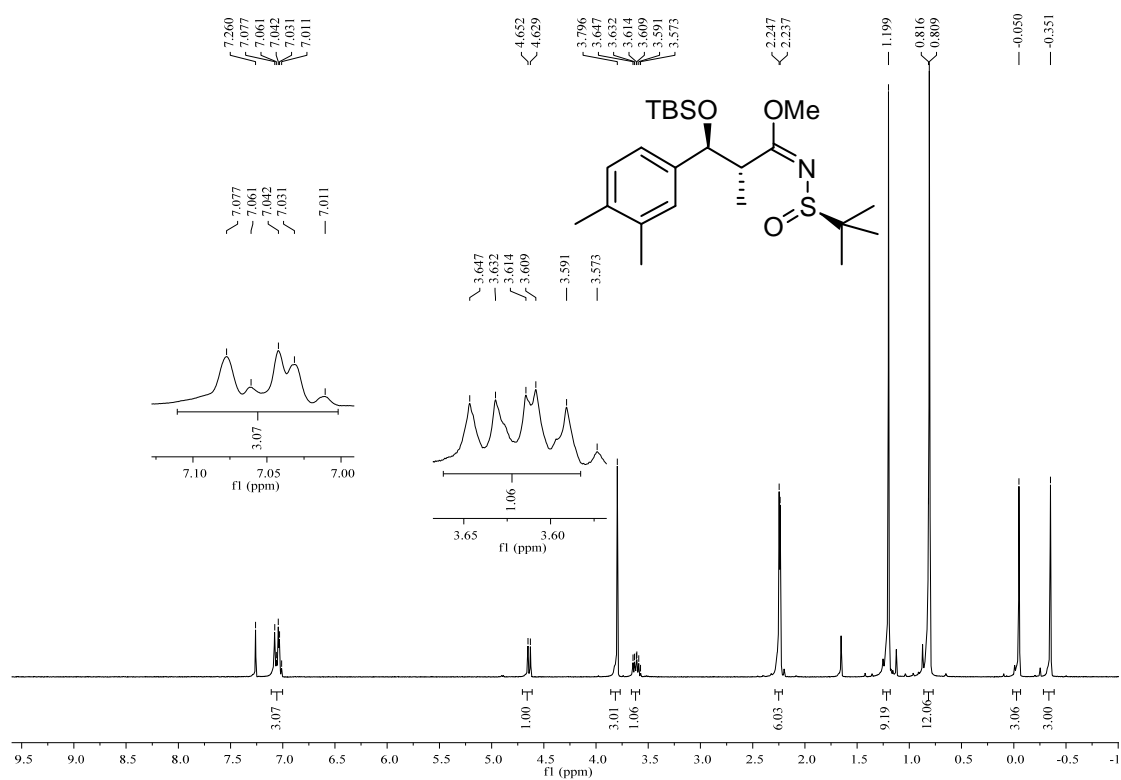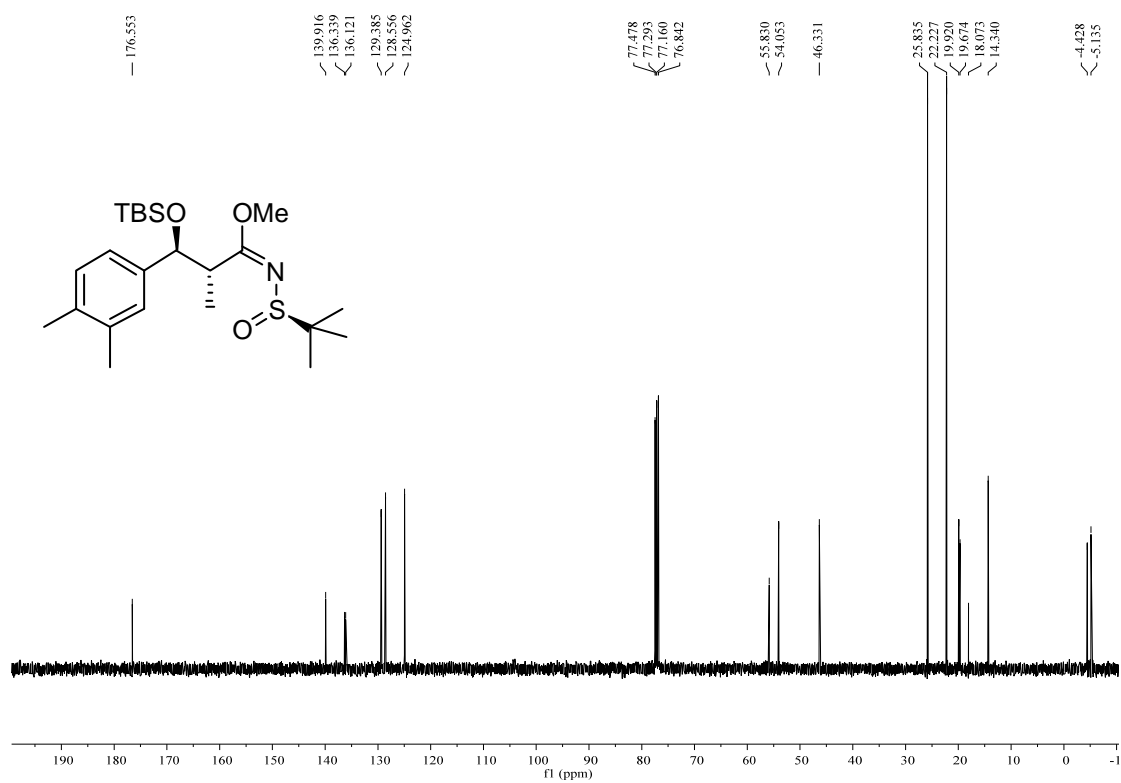

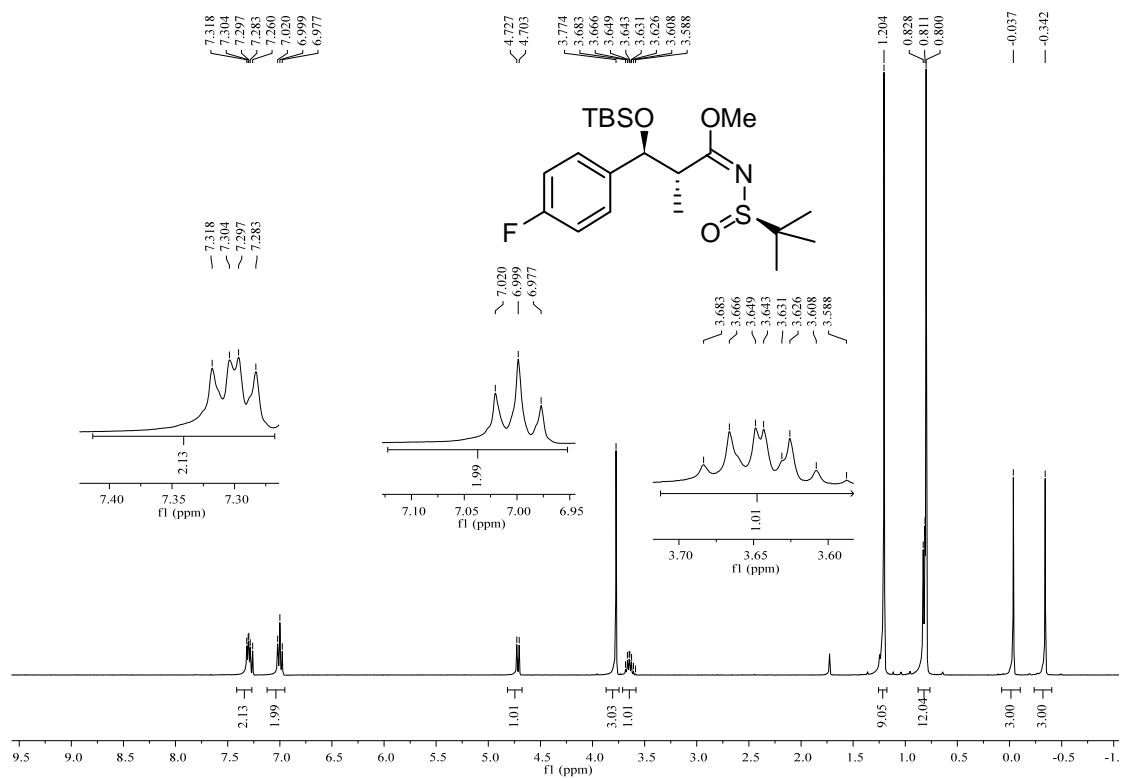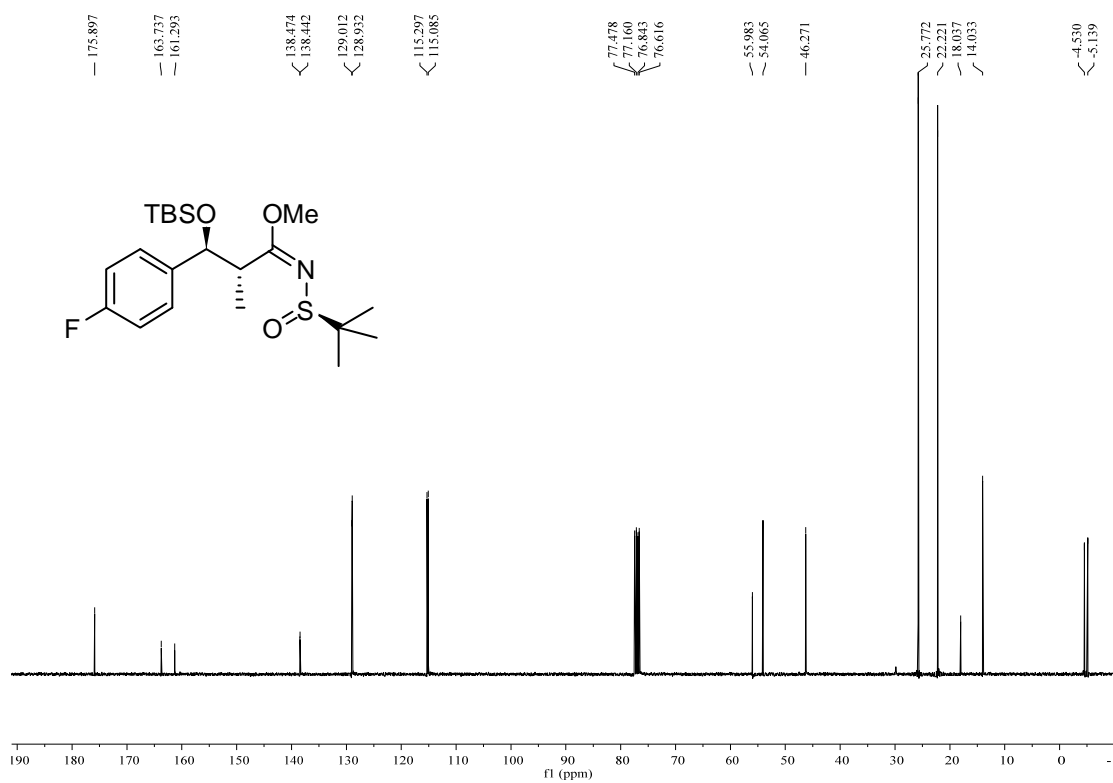

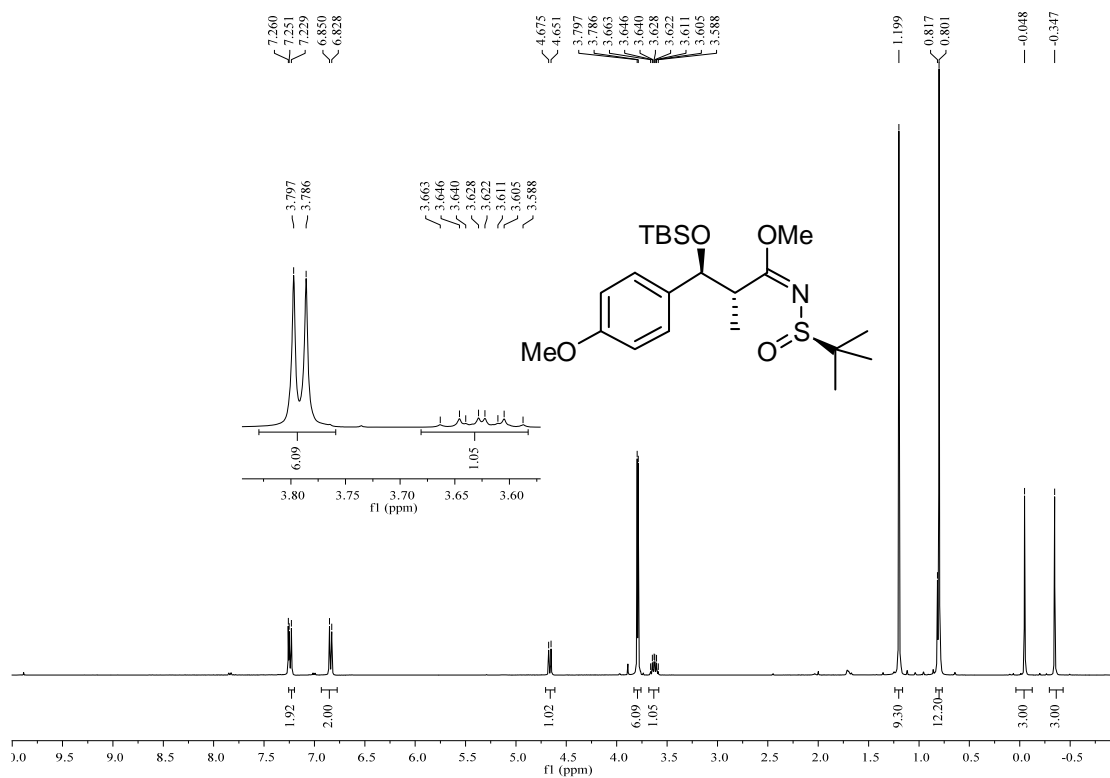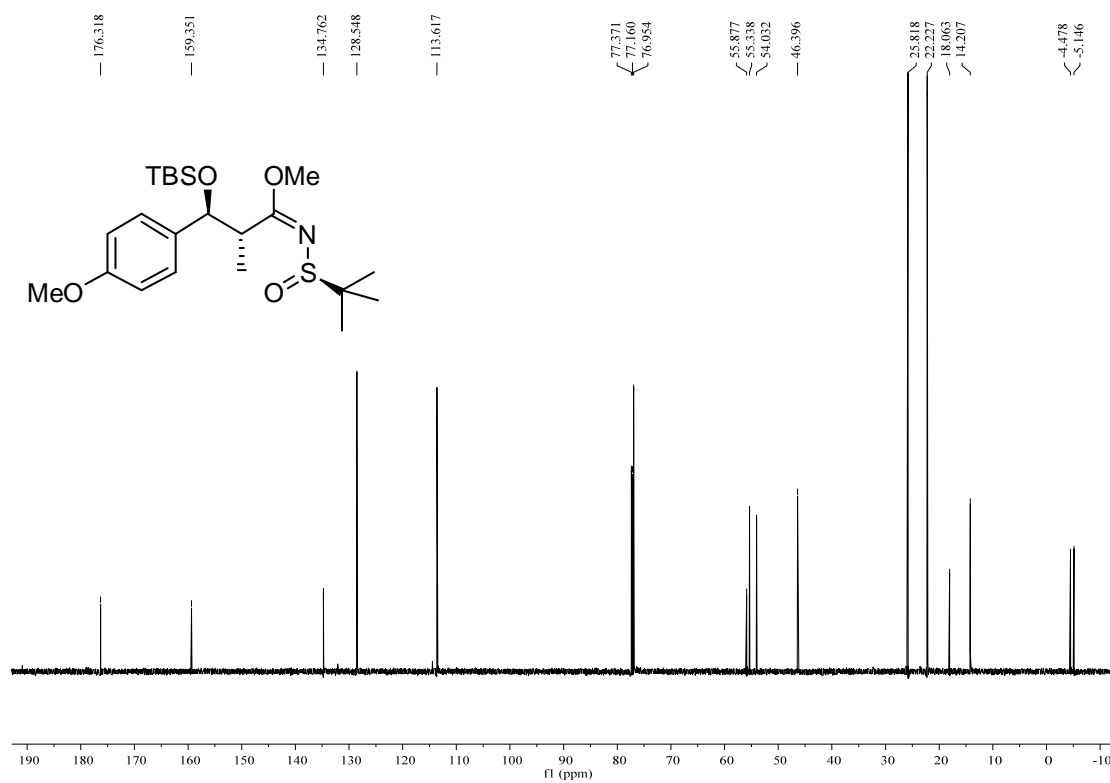

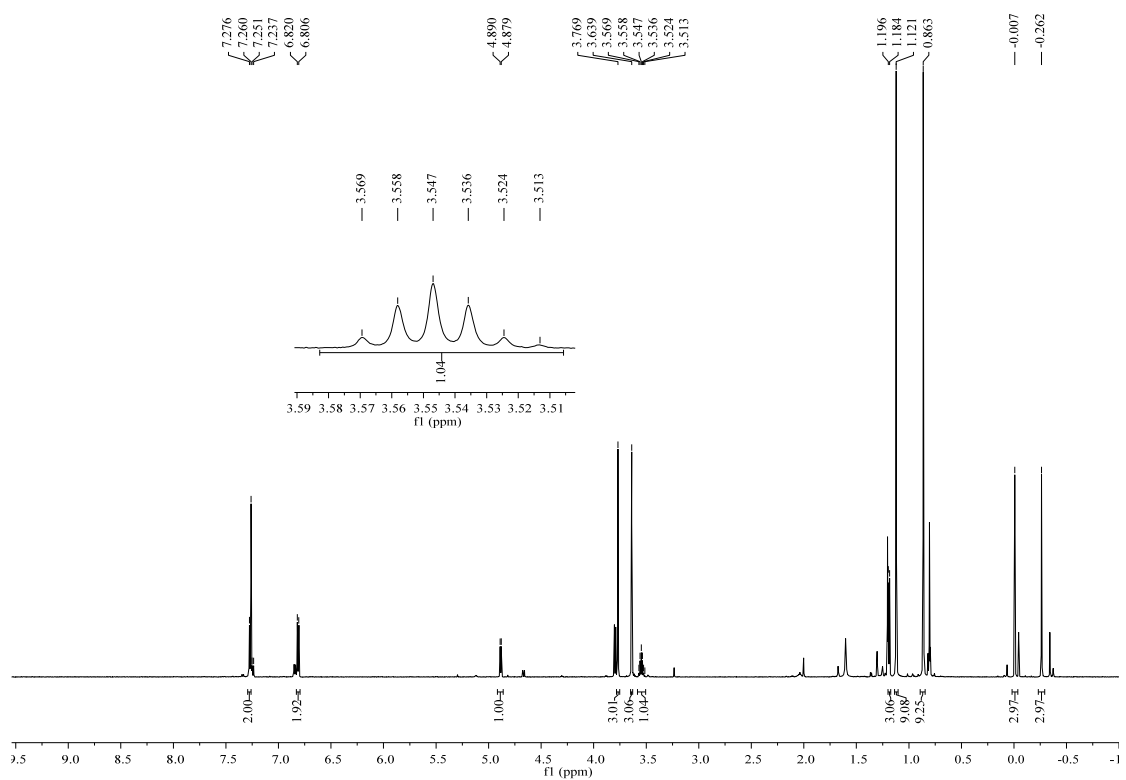

$^1\text{H}$  NMR spectrum ( $\text{CDCl}_3$ , 400 MHz) of **5o'** (minor diastereomer)

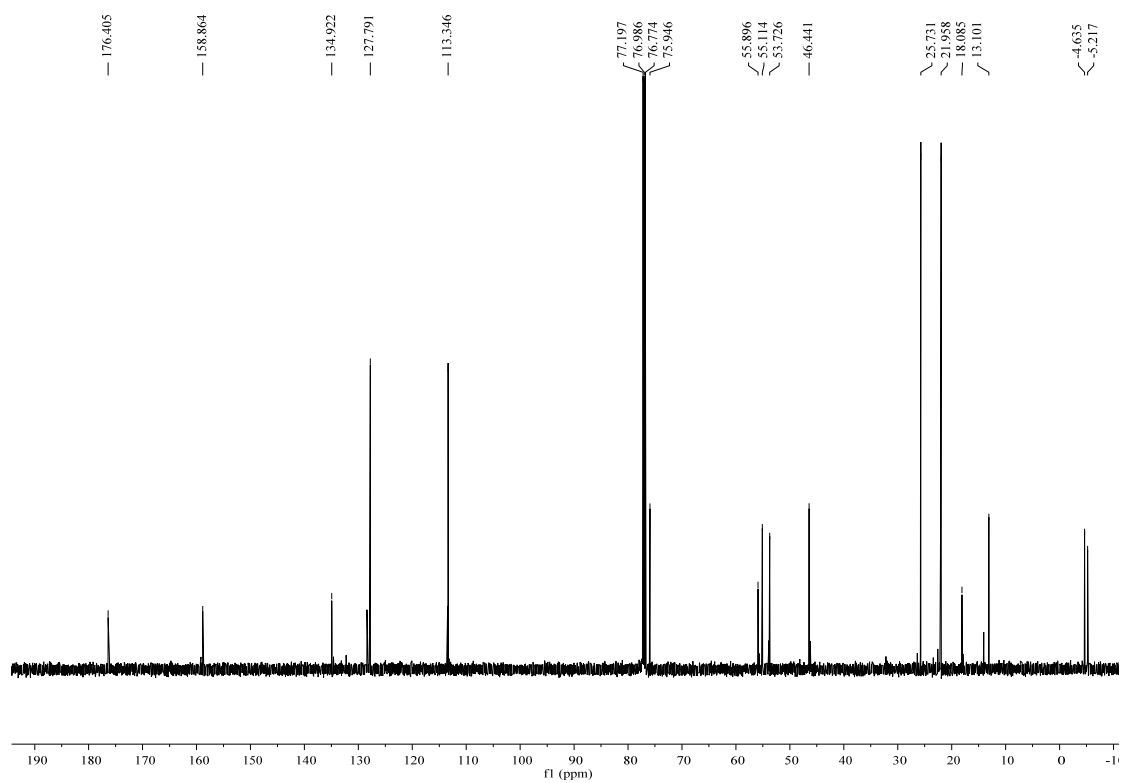

$^{13}\text{C}$  NMR spectrum ( $\text{CDCl}_3$ , 100 MHz) of **5o'** (minor diastereomer)



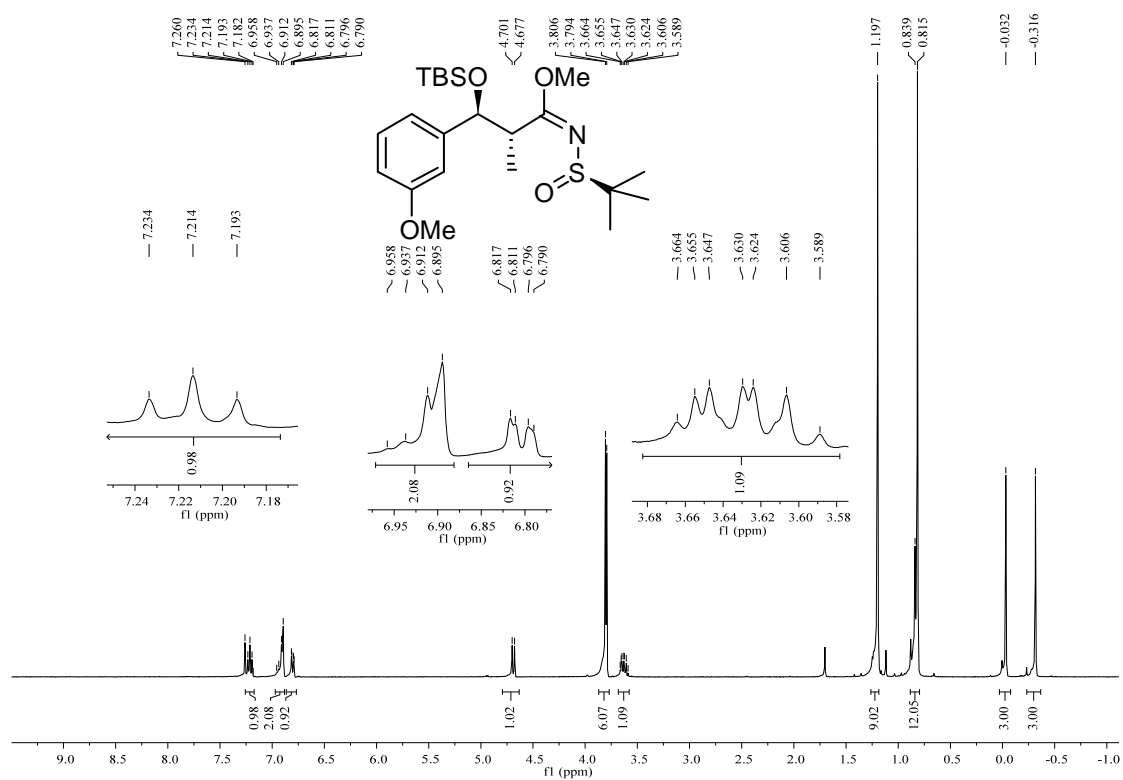

**<sup>1</sup>H NMR spectrum (CDCl<sub>3</sub>, 400 MHz) of **5p****

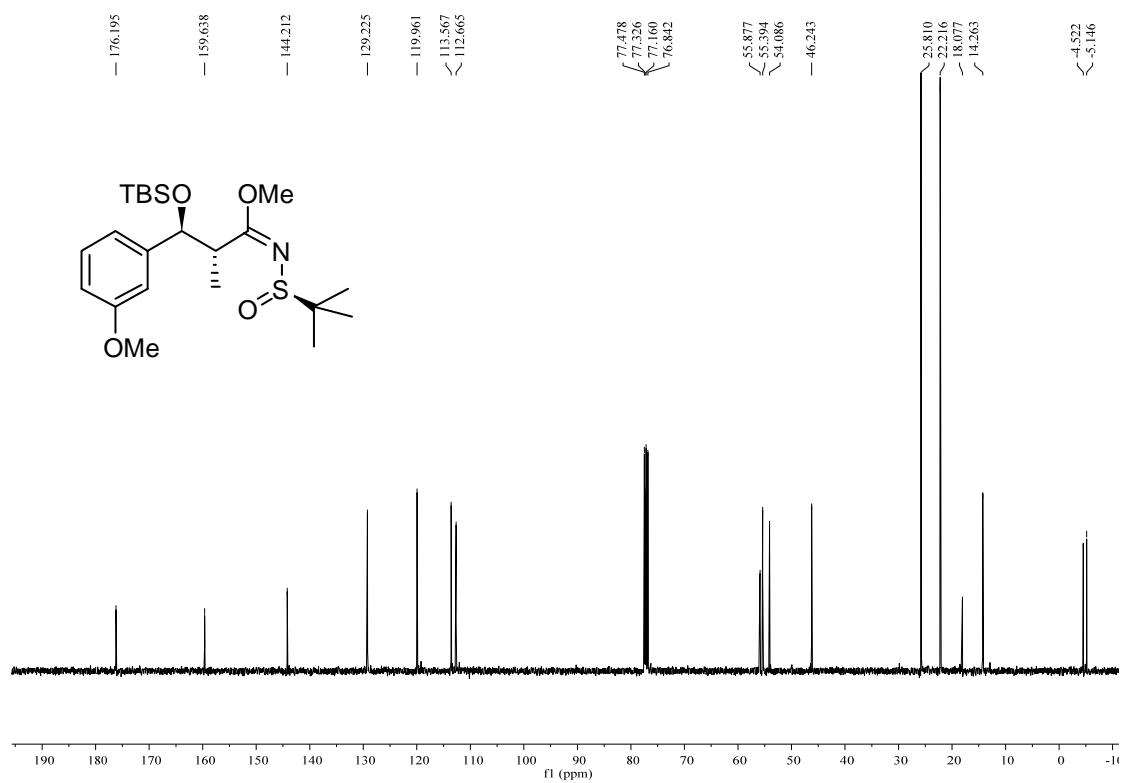

**<sup>13</sup>C NMR spectrum (CDCl<sub>3</sub>, 100 MHz) of **5p****

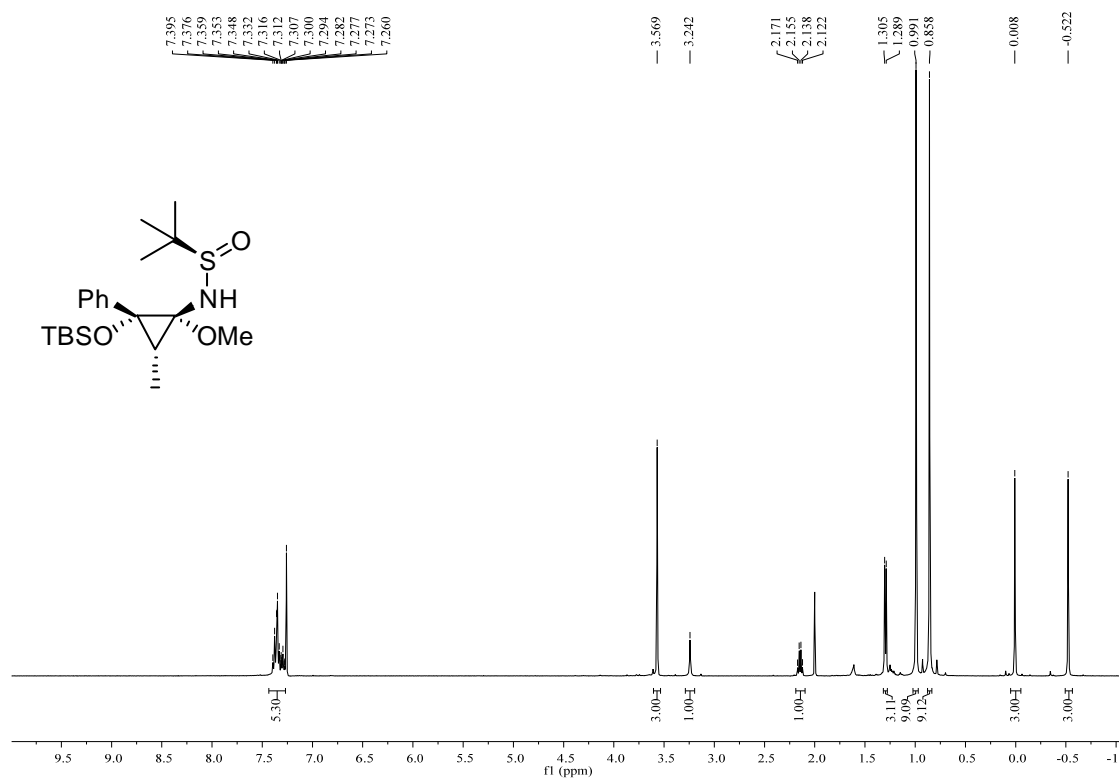

<sup>1</sup>H NMR spectrum (CDCl<sub>3</sub>, 400 MHz) of **4a**

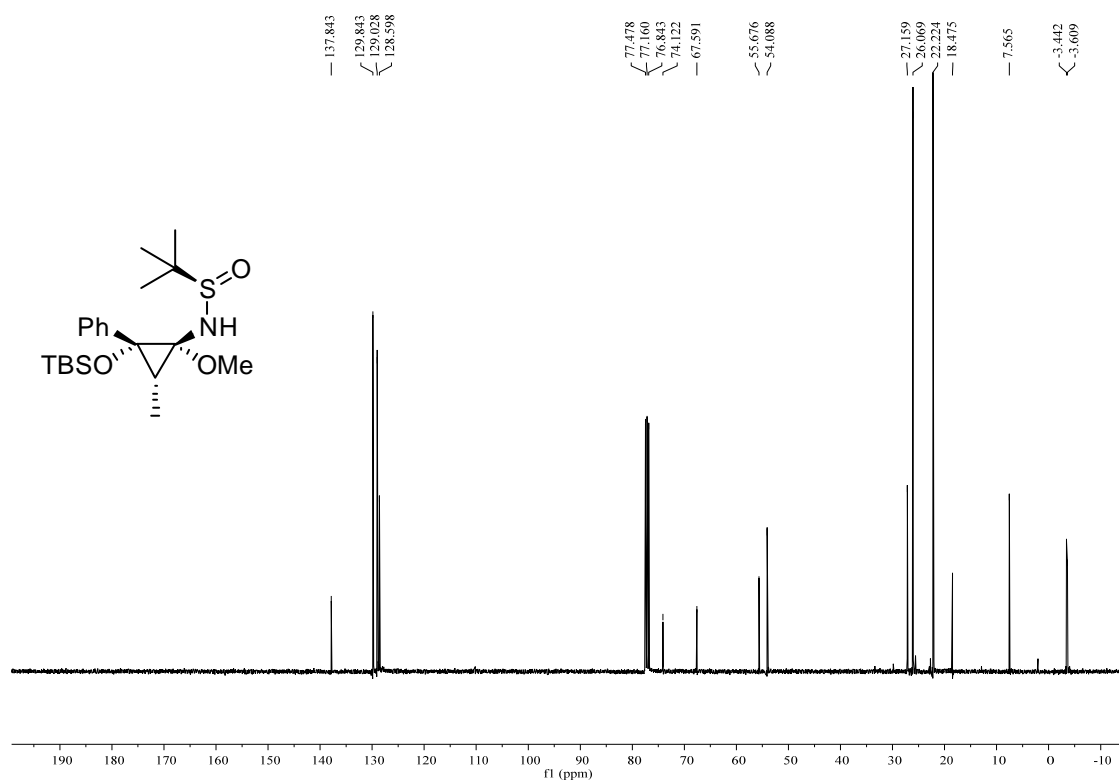

<sup>13</sup>C NMR spectrum (CDCl<sub>3</sub>, 100 MHz) of **4a**

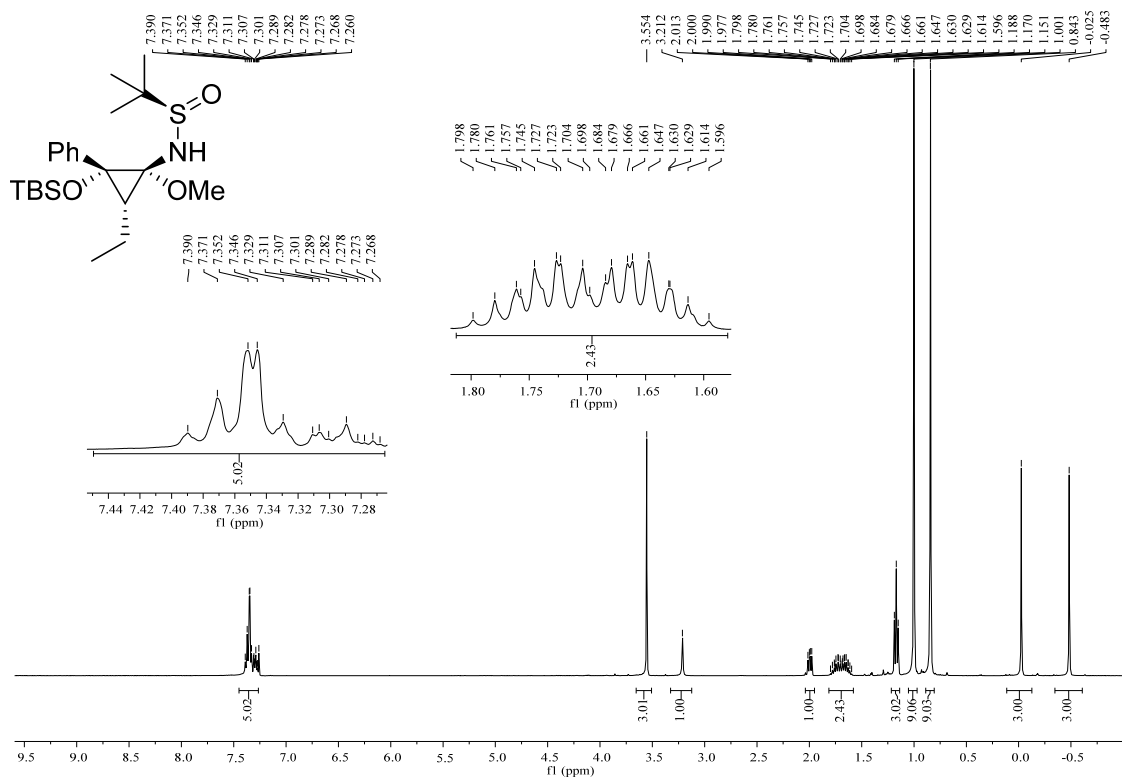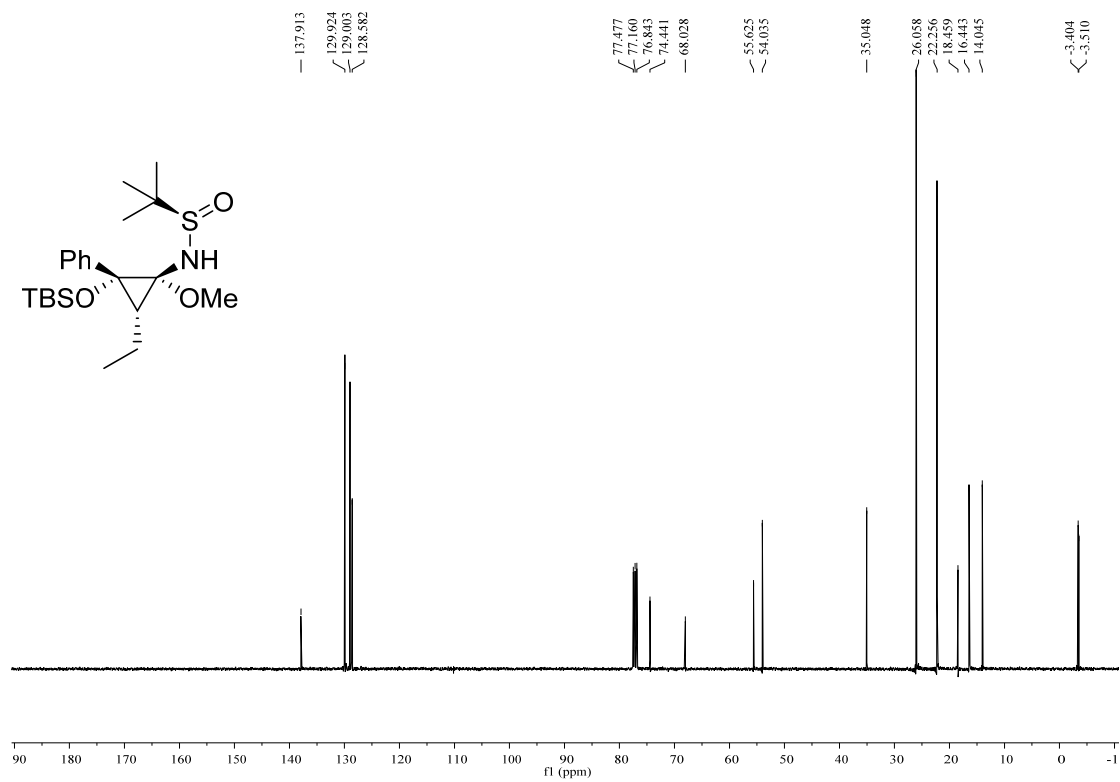

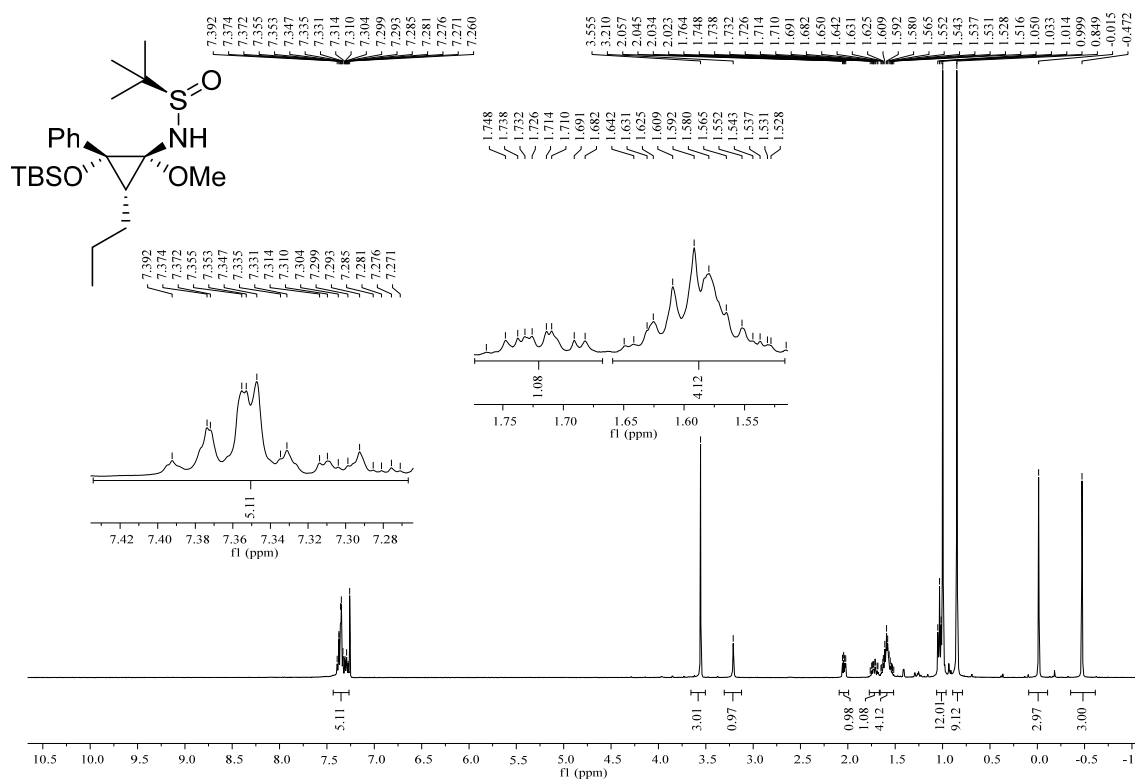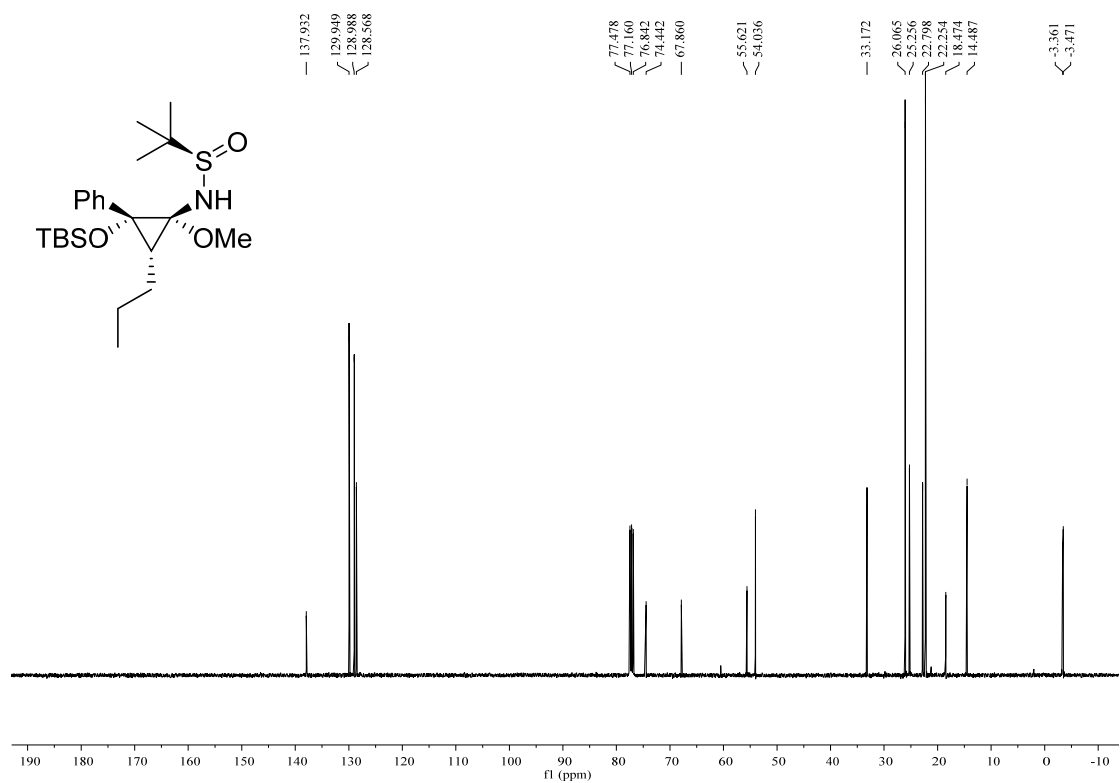

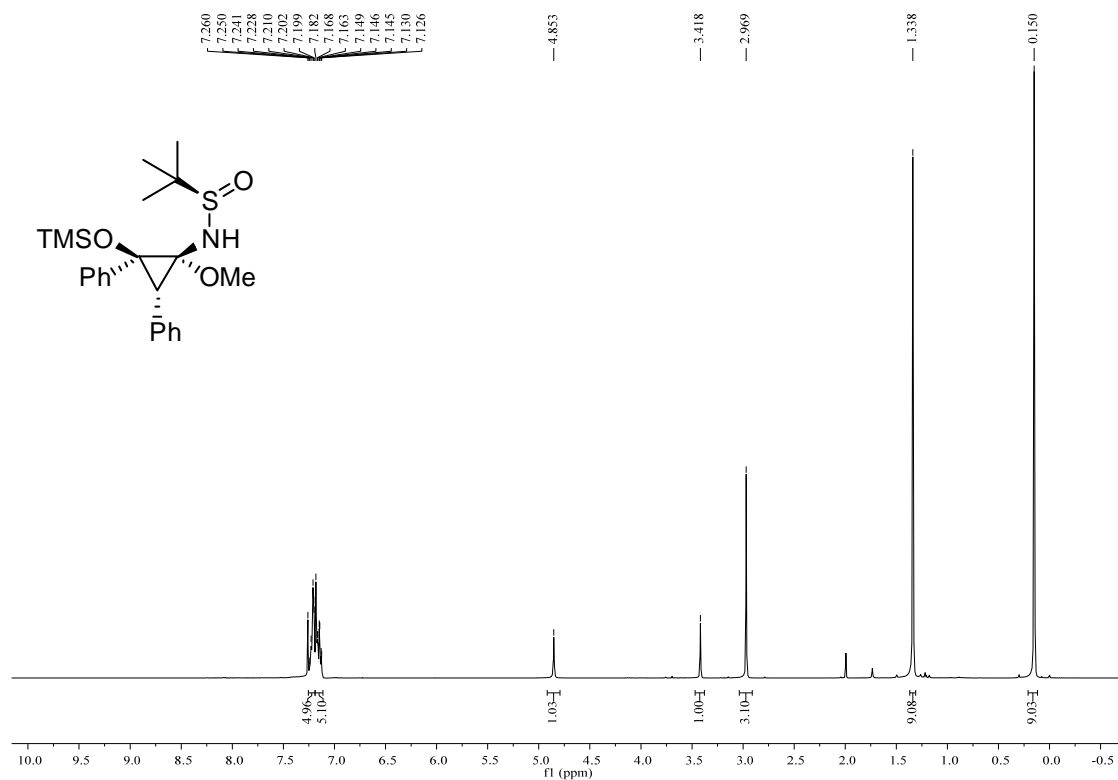

<sup>1</sup>H NMR spectrum (CDCl<sub>3</sub>, 400 MHz) of **3s**

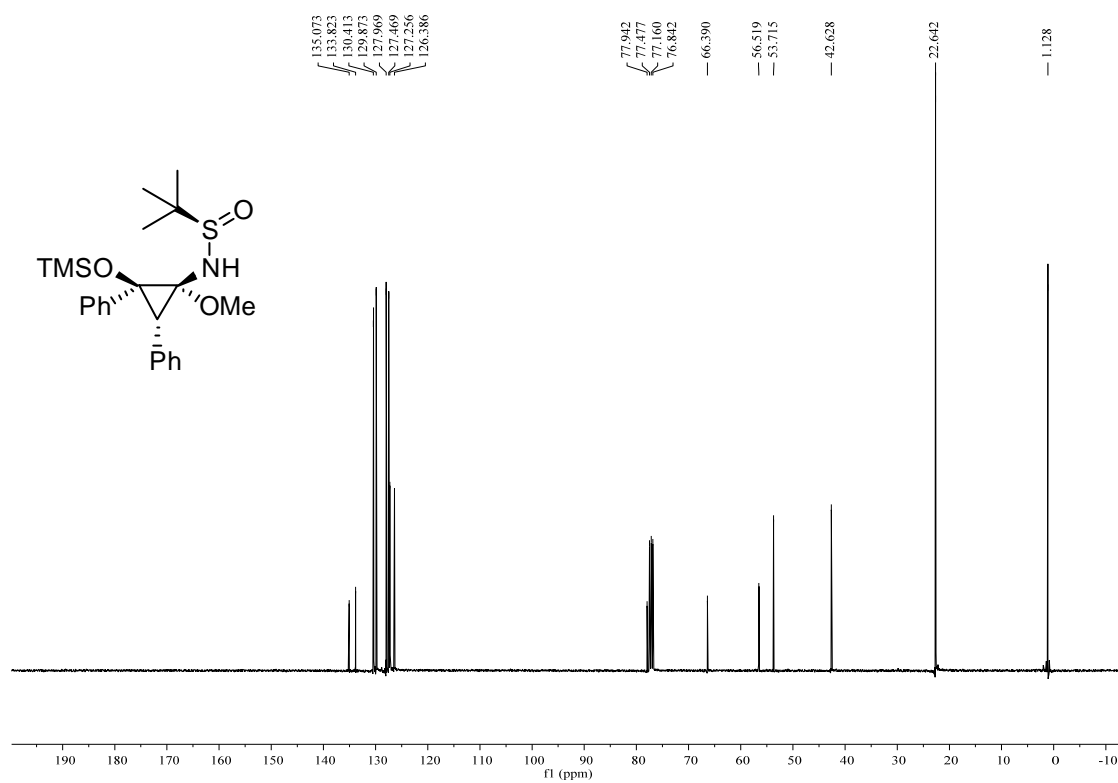

<sup>13</sup>C NMR spectrum (CDCl<sub>3</sub>, 100 MHz) of **3s**

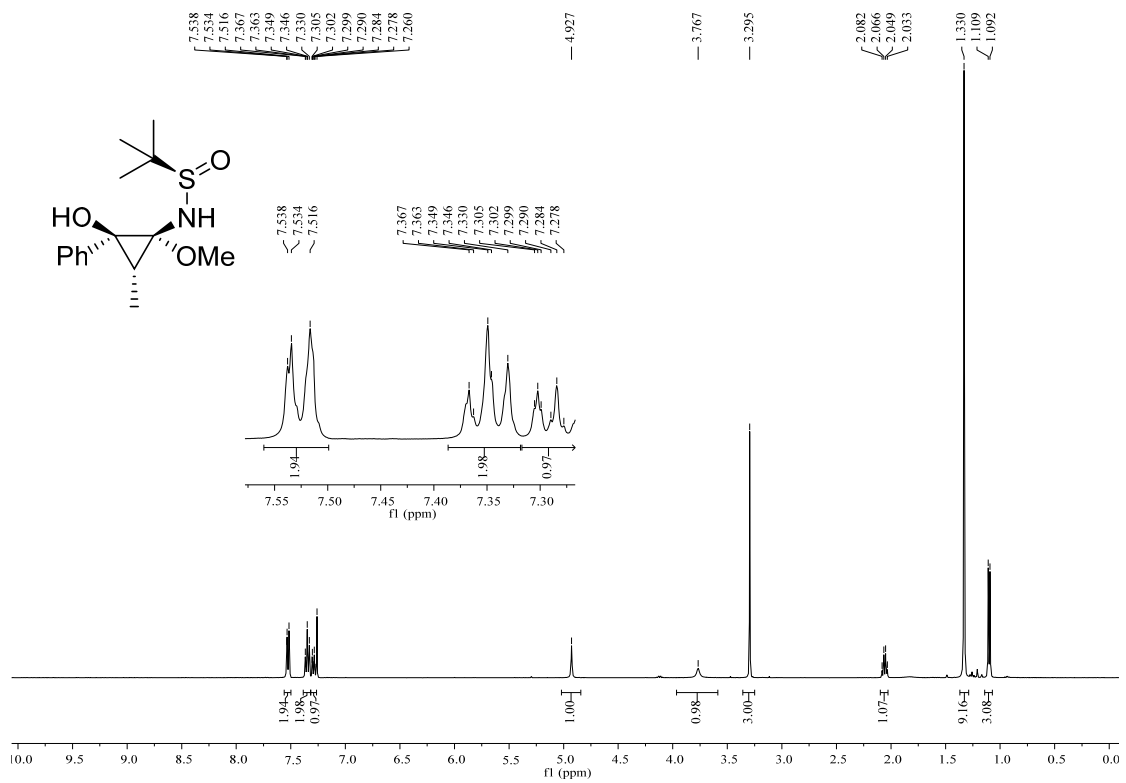

<sup>1</sup>H NMR spectrum (CDCl<sub>3</sub>, 400 MHz) of 6

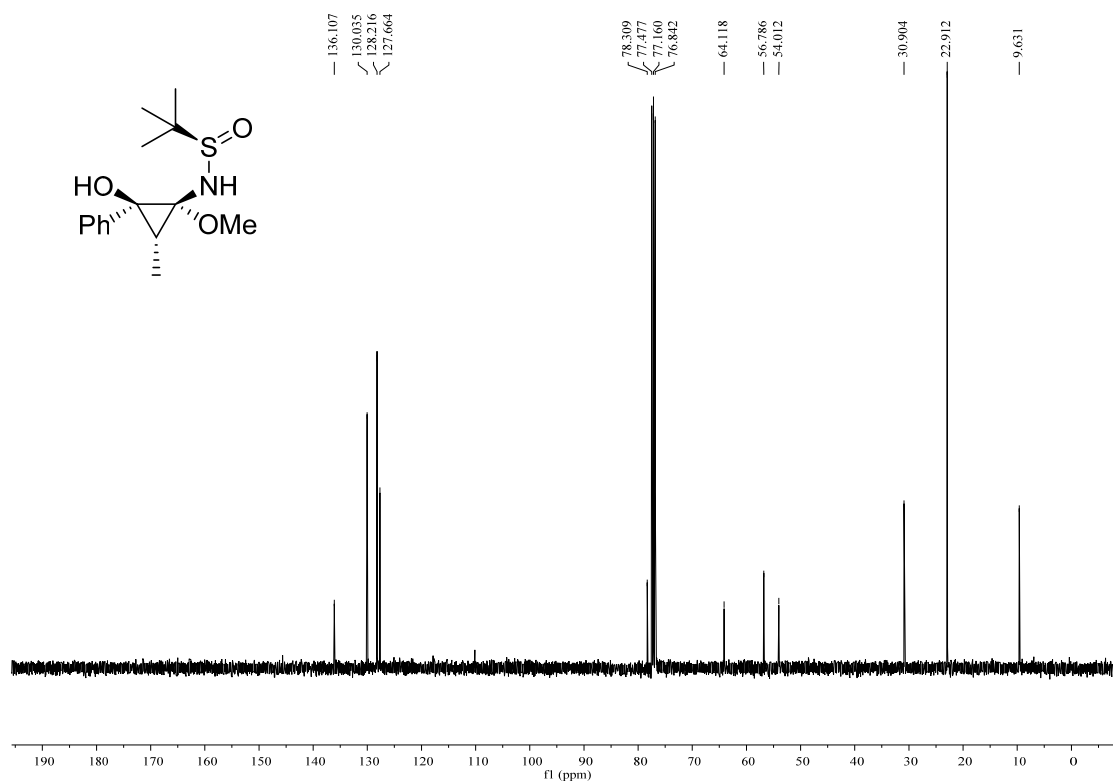

<sup>13</sup>C NMR spectrum (CDCl<sub>3</sub>, 100 MHz) of 6



## 9. X-Ray crystal structures of products

### Figure S1. X-Ray crystal structure of the compound **31**

The single crystals of compound **31** for X-ray structure studies were obtained by evaporation its solution of CH<sub>2</sub>Cl<sub>2</sub>/petroleum ether (1:6, v/v) at room temperature. X-Ray crystal structure (ORTEP) of compound **31** with the thermal ellipsoids shown at a 50% probability level.

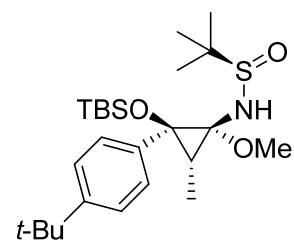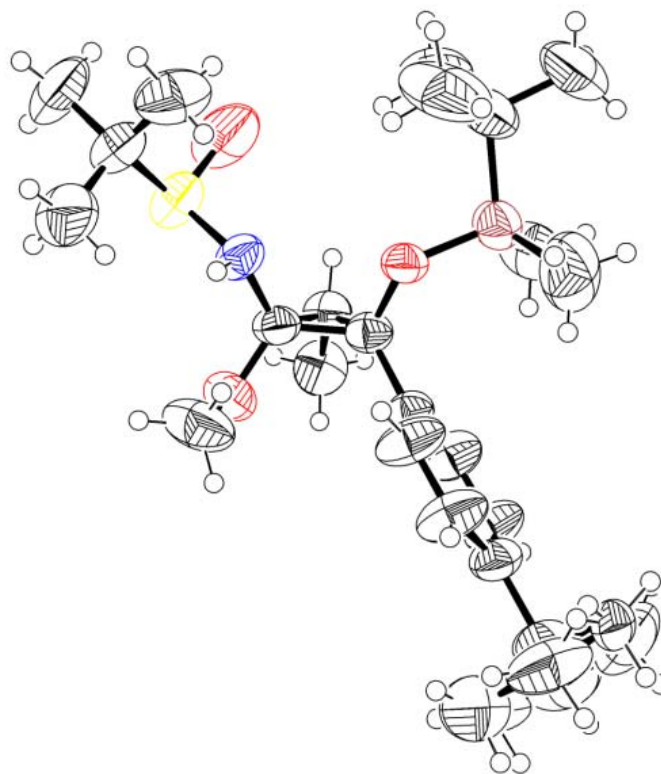



**Table S1 Crystal data and structure refinement for 3I**

|                                             |                                                               |
|---------------------------------------------|---------------------------------------------------------------|
| Identification code                         | <b>3I</b>                                                     |
| Empirical formula                           | C <sub>25</sub> H <sub>45</sub> NO <sub>3</sub> SSi           |
| Formula weight                              | 467.77                                                        |
| Temperature/K                               | 296.15                                                        |
| Crystal system                              | monoclinic                                                    |
| Space group                                 | P2 <sub>1</sub>                                               |
| a/Å                                         | 10.328(5)                                                     |
| b/Å                                         | 12.879(6)                                                     |
| c/Å                                         | 10.995(5)                                                     |
| α/°                                         | 90                                                            |
| β/°                                         | 96.809(7)                                                     |
| γ/°                                         | 90                                                            |
| Volume/Å <sup>3</sup>                       | 1452.1(11)                                                    |
| Z                                           | 2                                                             |
| ρ <sub>calc</sub> /cm <sup>3</sup>          | 1.070                                                         |
| μ/mm <sup>-1</sup>                          | 0.176                                                         |
| F(000)                                      | 512.0                                                         |
| Crystal size/mm <sup>3</sup>                | 0.272 × 0.184 × 0.117                                         |
| Radiation                                   | MoKα (λ = 0.71073)                                            |
| 2θ range for data collection/°              | 5.078 to 55.01                                                |
| Index ranges                                | -13 ≤ h ≤ 13, -16 ≤ k ≤ 14, -7 ≤ l ≤ 14                       |
| Reflections collected                       | 8972                                                          |
| Independent reflections                     | 6082 [R <sub>int</sub> = 0.0409, R <sub>sigma</sub> = 0.0907] |
| Data/restraints/parameters                  | 6082/1/293                                                    |
| Goodness-of-fit on F <sup>2</sup>           | 0.969                                                         |
| Final R indexes [I ≥ 2σ (I)]                | R <sub>1</sub> = 0.0641, wR <sub>2</sub> = 0.1389             |
| Final R indexes [all data]                  | R <sub>1</sub> = 0.1407, wR <sub>2</sub> = 0.1777             |
| Largest diff. peak/hole / e Å <sup>-3</sup> | 0.25/-0.22                                                    |
| Flack parameter                             | 0.16(9)                                                       |

**Table S2 Bond Lengths for 3I**

| Atom | Atom | Length/Å | Atom | Atom | Length/Å |
|------|------|----------|------|------|----------|
| S1   | N1   | 1.678(5) | C3AA | C9   | 1.372(8) |
| S1   | O15  | 1.481(6) | C7   | C8   | 1.362(9) |

|      |      |          |     |     |           |
|------|------|----------|-----|-----|-----------|
| S1   | C18  | 1.818(7) | C7  | C12 | 1.373(9)  |
| Si2  | O17  | 1.639(4) | C7  | C14 | 1.534(9)  |
| Si2  | C16  | 1.838(8) | C9  | C12 | 1.387(9)  |
| Si2  | C24  | 1.844(9) | C10 | C11 | 1.501(8)  |
| Si2  | C26  | 1.833(8) | C10 | C13 | 1.503(8)  |
| O17  | C1AA | 1.423(6) | C14 | C23 | 1.484(11) |
| O16  | C11  | 1.392(6) | C14 | C2  | 1.523(13) |
| O16  | C20  | 1.400(8) | C14 | C4  | 1.473(13) |
| C1AA | C3AA | 1.490(8) | C16 | C25 | 1.540(10) |
| C1AA | C10  | 1.516(8) | C16 | C1  | 1.523(13) |
| C1AA | C11  | 1.513(8) | C16 | C3  | 1.554(13) |
| N1   | C11  | 1.426(7) | C17 | C18 | 1.550(10) |
| C2AA | C3AA | 1.362(8) | C18 | C19 | 1.479(10) |
| C2AA | C8   | 1.387(9) | C18 | C21 | 1.518(10) |

**Table S3 Bond Angles for 3l**

| Atom | Atom | Atom | Angle/°  | Atom | Atom | Atom | Angle/°   |
|------|------|------|----------|------|------|------|-----------|
| N1   | S1   | C18  | 98.1(3)  | C11  | C10  | C13  | 121.5(5)  |
| O15  | S1   | N1   | 108.6(3) | C13  | C10  | C1AA | 126.1(5)  |
| O15  | S1   | C18  | 105.8(3) | O16  | C11  | C1AA | 119.1(5)  |
| O17  | Si2  | C16  | 105.7(3) | O16  | C11  | N1   | 115.7(5)  |
| O17  | Si2  | C24  | 106.8(4) | O16  | C11  | C10  | 112.9(5)  |
| O17  | Si2  | C26  | 111.4(3) | N1   | C11  | C1AA | 116.2(5)  |
| C16  | Si2  | C24  | 110.3(5) | N1   | C11  | C10  | 121.5(5)  |
| C26  | Si2  | C16  | 113.6(4) | C10  | C11  | C1AA | 60.4(4)   |
| C26  | Si2  | C24  | 108.8(5) | C7   | C12  | C9   | 123.0(6)  |
| C1AA | O17  | Si2  | 127.8(3) | C23  | C14  | C7   | 108.5(6)  |
| C11  | O16  | C20  | 114.6(5) | C23  | C14  | C2   | 106.1(9)  |
| O17  | C1AA | C3AA | 113.1(5) | C2   | C14  | C7   | 112.1(6)  |
| O17  | C1AA | C10  | 114.6(4) | C4   | C14  | C7   | 109.8(7)  |
| O17  | C1AA | C11  | 111.4(4) | C4   | C14  | C23  | 115.0(10) |
| C3AA | C1AA | C10  | 125.9(5) | C4   | C14  | C2   | 105.3(9)  |
| C3AA | C1AA | C11  | 121.6(5) | C25  | C16  | Si2  | 110.8(6)  |
| C11  | C1AA | C10  | 59.4(4)  | C25  | C16  | C3   | 109.4(8)  |
| C11  | N1   | S1   | 116.6(4) | C1   | C16  | Si2  | 110.7(6)  |

|      |      |      |          |     |     |     |           |
|------|------|------|----------|-----|-----|-----|-----------|
| C3AA | C2AA | C8   | 122.3(6) | C1  | C16 | C25 | 109.6(8)  |
| C2AA | C3AA | C1AA | 119.6(5) | C1  | C16 | C3  | 107.9(10) |
| C2AA | C3AA | C9   | 117.0(5) | C3  | C16 | Si2 | 108.3(6)  |
| C9   | C3AA | C1AA | 123.3(5) | C17 | C18 | S1  | 103.1(5)  |
| C8   | C7   | C12  | 116.0(6) | C19 | C18 | S1  | 112.8(5)  |
| C8   | C7   | C14  | 123.0(6) | C19 | C18 | C17 | 110.4(7)  |
| C12  | C7   | C14  | 120.9(6) | C19 | C18 | C21 | 112.9(7)  |
| C7   | C8   | C2AA | 121.5(7) | C21 | C18 | S1  | 106.9(5)  |
| C3AA | C9   | C12  | 120.2(6) | C21 | C18 | C17 | 110.3(7)  |
| C11  | C10  | C1AA | 60.2(4)  |     |     |     |           |

---

**Figure S2. X-Ray crystal structure of the compound 5k**

The single crystals of compound **5k** for X-ray structure studies were obtained by evaporation its solution of CH<sub>2</sub>Cl<sub>2</sub>/petroleum ether (1:4, v/v) at room temperature. X-Ray crystal structure (ORTEP) of compound **5k** with the thermal ellipsoids shown at a 50% probability level.

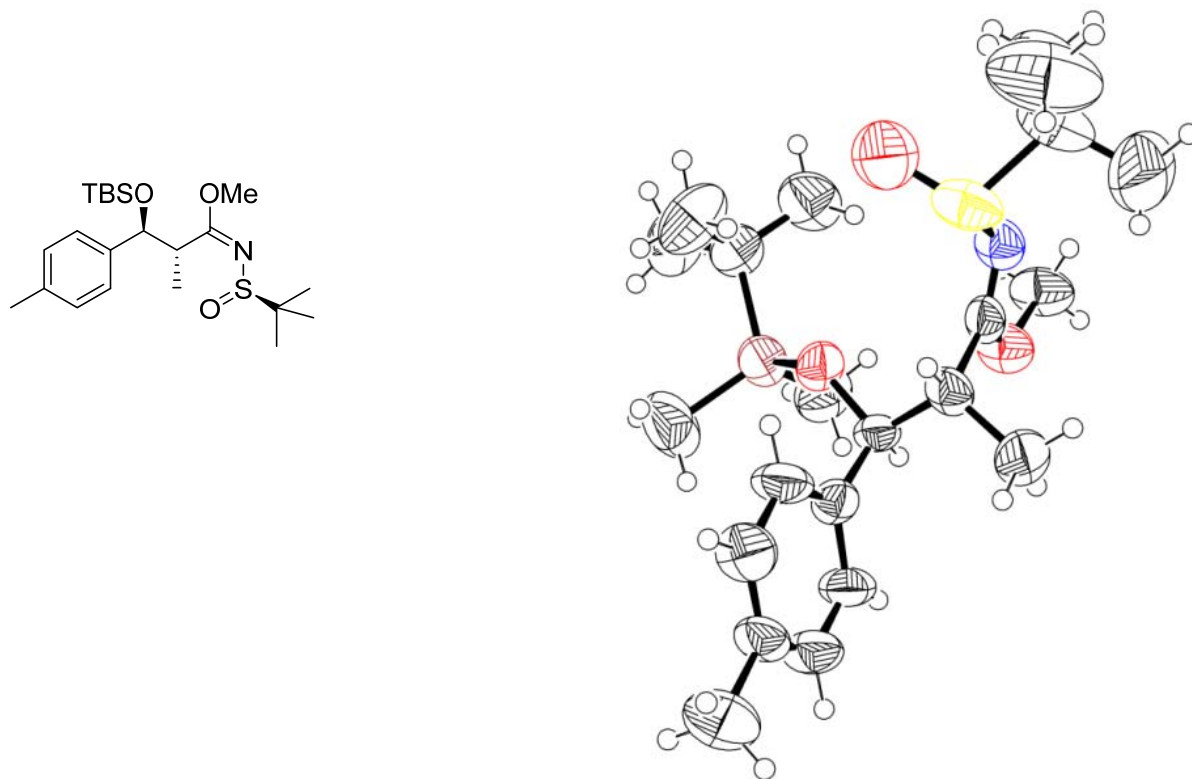

**Table S4 Crystal data and structure refinement for 5k**

|                                             |                                                               |
|---------------------------------------------|---------------------------------------------------------------|
| Identification code                         | <b>5k</b>                                                     |
| Empirical formula                           | C <sub>22</sub> H <sub>39</sub> NO <sub>3</sub> SSi           |
| Formula weight                              | 425.69                                                        |
| Temperature/K                               | 296.15                                                        |
| Crystal system                              | triclinic                                                     |
| Space group                                 | P1                                                            |
| a/Å                                         | 7.182(8)                                                      |
| b/Å                                         | 9.354(10)                                                     |
| c/Å                                         | 10.768(11)                                                    |
| α/°                                         | 108.471(14)                                                   |
| β/°                                         | 90.746(16)                                                    |
| γ/°                                         | 107.794(15)                                                   |
| Volume/Å <sup>3</sup>                       | 648.4(12)                                                     |
| Z                                           | 1                                                             |
| ρ <sub>calc</sub> /cm <sup>3</sup>          | 1.090                                                         |
| μ/mm <sup>-1</sup>                          | 0.191                                                         |
| F(000)                                      | 232.0                                                         |
| Crystal size/mm <sup>3</sup>                | 0.207 × 0.198 × 0.128                                         |
| Radiation                                   | MoKα (λ = 0.71073)                                            |
| 2θ range for data collection/°              | 4.858 to 54.448                                               |
| Index ranges                                | -8 ≤ h ≤ 9, -11 ≤ k ≤ 11, -13 ≤ l ≤ 11                        |
| Reflections collected                       | 3863                                                          |
| Independent reflections                     | 3317 [R <sub>int</sub> = 0.0367, R <sub>sigma</sub> = 0.1025] |
| Data/restraints/parameters                  | 3317/6/264                                                    |
| Goodness-of-fit on F <sup>2</sup>           | 0.974                                                         |
| Final R indexes [I ≥ 2σ (I)]                | R <sub>1</sub> = 0.0828, wR <sub>2</sub> = 0.2133             |
| Final R indexes [all data]                  | R <sub>1</sub> = 0.1590, wR <sub>2</sub> = 0.2894             |
| Largest diff. peak/hole / e Å <sup>-3</sup> | 0.39/-0.29                                                    |
| Flack parameter                             | -0.10(19)                                                     |

**Table 5 Bond Lengths for 5k**

| Atom | Atom | Length/Å | Atom | Atom | Length/Å  |
|------|------|----------|------|------|-----------|
| Si1  | O15  | 1.657(7) | C6   | C7   | 1.392(14) |

|     |     |           |     |     |           |
|-----|-----|-----------|-----|-----|-----------|
| Si1 | C16 | 1.846(15) | C6  | C11 | 1.355(14) |
| Si1 | C19 | 1.880(14) | C7  | C10 | 1.359(15) |
| Si1 | C22 | 1.850(15) | C8  | C13 | 1.549(16) |
| S2  | N1  | 1.707(10) | C9  | C11 | 1.348(16) |
| S2  | O14 | 1.502(11) | C9  | C12 | 1.306(19) |
| S2  | C1  | 1.787(15) | C9  | C24 | 1.559(17) |
| O15 | C5  | 1.442(11) | C10 | C12 | 1.419(15) |
| O2  | C4  | 1.333(13) | C17 | C1  | 1.526(17) |
| O2  | C15 | 1.463(11) | C18 | C19 | 1.569(17) |
| N1  | C4  | 1.219(14) | C19 | C20 | 1.512(17) |
| C4  | C8  | 1.510(13) | C19 | C23 | 1.481(19) |
| C5  | C7  | 1.481(12) | C21 | C1  | 1.540(15) |
| C5  | C8  | 1.580(14) | C1  | C2  | 1.555(17) |

**Table 6 Bond Angles for 5k**

| Atom | Atom | Atom | Angle/°   | Atom | Atom | Atom | Angle/°   |
|------|------|------|-----------|------|------|------|-----------|
| O15  | Si1  | C16  | 109.4(6)  | C4   | C8   | C5   | 109.2(8)  |
| O15  | Si1  | C19  | 103.0(5)  | C4   | C8   | C13  | 110.3(9)  |
| O15  | Si1  | C22  | 109.3(6)  | C13  | C8   | C5   | 109.0(9)  |
| C16  | Si1  | C19  | 113.4(6)  | C11  | C9   | C24  | 117.6(14) |
| C16  | Si1  | C22  | 110.4(9)  | C12  | C9   | C11  | 115.6(10) |
| C22  | Si1  | C19  | 111.1(7)  | C12  | C9   | C24  | 126.8(14) |
| N1   | S2   | C1   | 94.5(6)   | C7   | C10  | C12  | 118.1(11) |
| O14  | S2   | N1   | 108.0(6)  | C9   | C11  | C6   | 124.2(11) |
| O14  | S2   | C1   | 106.8(7)  | C9   | C12  | C10  | 124.6(13) |
| C5   | O15  | Si1  | 124.1(7)  | C18  | C19  | Si1  | 108.2(11) |
| C4   | O2   | C15  | 116.7(9)  | C20  | C19  | Si1  | 109.8(9)  |
| C4   | N1   | S2   | 119.1(7)  | C20  | C19  | C18  | 107.7(10) |
| O2   | C4   | C8   | 111.1(11) | C23  | C19  | Si1  | 111.4(9)  |
| N1   | C4   | O2   | 120.8(9)  | C23  | C19  | C18  | 109.4(12) |
| N1   | C4   | C8   | 128.0(11) | C23  | C19  | C20  | 110.4(14) |
| O15  | C5   | C7   | 112.0(8)  | C17  | C1   | S2   | 110.4(11) |
| O15  | C5   | C8   | 102.7(7)  | C17  | C1   | C21  | 114.8(16) |
| C7   | C5   | C8   | 110.1(7)  | C17  | C1   | C2   | 108.6(18) |

|     |    |    |           |     |    |    |           |
|-----|----|----|-----------|-----|----|----|-----------|
| C11 | C6 | C7 | 119.5(11) | C21 | C1 | S2 | 111.4(11) |
| C6  | C7 | C5 | 120.1(10) | C21 | C1 | C2 | 104.7(16) |
| C10 | C7 | C5 | 122.3(10) | C2  | C1 | S2 | 106.3(15) |
| C10 | C7 | C6 | 117.6(9)  |     |    |    |           |

---

**Figure S3. X-Ray crystal structure of the compound 4a**

The single crystals of compound **4a** for X-ray structure studies were obtained by evaporation its solution of CH<sub>2</sub>Cl<sub>2</sub>/petroleum ether (1:8, v/v) at room temperature. X-Ray crystal structure (ORTEP) of compound **4a** with the thermal ellipsoids shown at a 50% probability level.

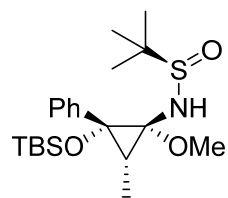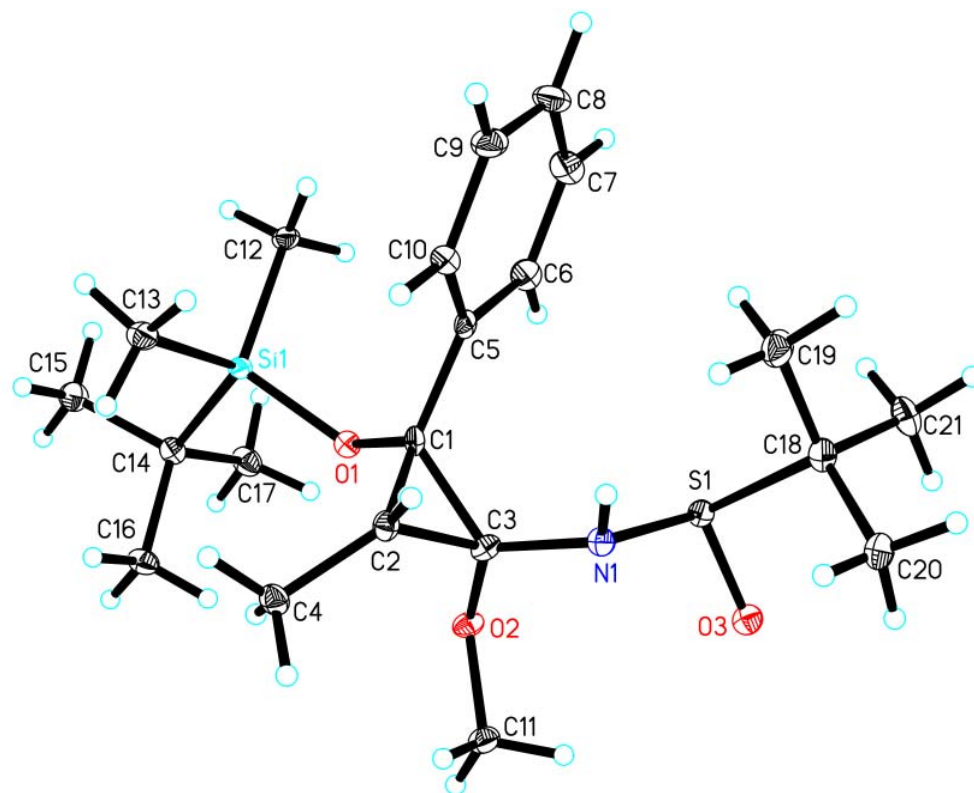



**Table S7 Crystal data and structure refinement for 4a**

|                                             |                                                               |
|---------------------------------------------|---------------------------------------------------------------|
| Identification code                         | 4a                                                            |
| Empirical formula                           | C <sub>21</sub> H <sub>39</sub> NO <sub>4</sub> SSi           |
| Formula weight                              | 429.68                                                        |
| Temperature/K                               | 100.01(10)                                                    |
| Crystal system                              | monoclinic                                                    |
| Space group                                 | P2 <sub>1</sub>                                               |
| a/Å                                         | 13.2420(5)                                                    |
| b/Å                                         | 6.4724(3)                                                     |
| c/Å                                         | 14.3242(5)                                                    |
| α/°                                         | 90                                                            |
| β/°                                         | 92.113(3)                                                     |
| γ/°                                         | 90                                                            |
| Volume/Å <sup>3</sup>                       | 1226.86(8)                                                    |
| Z                                           | 2                                                             |
| ρ <sub>calc</sub> /cm <sup>3</sup>          | 1.163                                                         |
| μ/mm <sup>-1</sup>                          | 1.833                                                         |
| F(000)                                      | 468.0                                                         |
| Crystal size/mm <sup>3</sup>                | 0.14 × 0.13 × 0.12                                            |
| Radiation                                   | CuKα (λ = 1.54184)                                            |
| 2θ range for data collection/°              | 6.174 to 147.848                                              |
| Index ranges                                | -16 ≤ h ≤ 16, -7 ≤ k ≤ 7, -17 ≤ l ≤ 17                        |
| Reflections collected                       | 9985                                                          |
| Independent reflections                     | 4600 [R <sub>int</sub> = 0.0439, R <sub>sigma</sub> = 0.0498] |
| Data/restraints/parameters                  | 4600/1/266                                                    |
| Goodness-of-fit on F <sup>2</sup>           | 1.027                                                         |
| Final R indexes [I ≥ 2σ (I)]                | R <sub>1</sub> = 0.0625, wR <sub>2</sub> = 0.1695             |
| Final R indexes [all data]                  | R <sub>1</sub> = 0.0634, wR <sub>2</sub> = 0.1701             |
| Largest diff. peak/hole / e Å <sup>-3</sup> | 0.96/-0.49                                                    |
| Flack parameter                             | 0.027(16)                                                     |

**Table S8 Bond Lengths for 4a**

| Atom   | Atom | Length/Å | Atom | Atom | Length/Å |
|--------|------|----------|------|------|----------|
| S(001) | O(3) | 1.504(5) | C(5) | C(6) | 1.401(9) |

|        |       |          |       |       |           |
|--------|-------|----------|-------|-------|-----------|
| S(001) | N(1)  | 1.661(5) | C(1)  | C(3)  | 1.512(8)  |
| S(001) | C(18) | 1.859(6) | C(1)  | C(2)  | 1.535(8)  |
| Si(02) | O(1)  | 1.663(4) | C(3)  | C(2)  | 1.507(9)  |
| Si(02) | C(12) | 1.874(6) | C(6)  | C(7)  | 1.379(9)  |
| Si(02) | C(14) | 1.896(6) | C(9)  | C(8)  | 1.400(11) |
| Si(02) | C(13) | 1.870(7) | C(16) | C(14) | 1.535(8)  |
| O(1)   | C(1)  | 1.384(7) | C(17) | C(14) | 1.536(10) |
| O(2)   | C(3)  | 1.405(7) | C(7)  | C(8)  | 1.380(11) |
| O(2)   | C(11) | 1.426(7) | C(4)  | C(2)  | 1.505(8)  |
| N(1)   | C(3)  | 1.429(8) | C(14) | C(15) | 1.522(9)  |
| C(10)  | C(5)  | 1.388(9) | C(18) | C(19) | 1.515(9)  |
| C(10)  | C(9)  | 1.395(9) | C(18) | C(20) | 1.498(9)  |
| C(5)   | C(1)  | 1.509(8) | C(18) | C(21) | 1.532(10) |

---

**Table S9 Bond Angles for 4a**

| Atom  | Atom   | Atom   | Angle/°  | Atom  | Atom  | Atom   | Angle/°  |
|-------|--------|--------|----------|-------|-------|--------|----------|
| O(3)  | S(001) | N(1)   | 110.5(3) | O(2)  | C(3)  | C(2)   | 118.4(5) |
| O(3)  | S(001) | C(18)  | 104.3(3) | N(1)  | C(3)  | C(1)   | 120.2(5) |
| N(1)  | S(001) | C(18)  | 100.2(3) | N(1)  | C(3)  | C(2)   | 115.1(5) |
| O(1)  | Si(02) | C(12)  | 111.1(3) | C(2)  | C(3)  | C(1)   | 61.1(4)  |
| O(1)  | Si(02) | C(14)  | 103.9(2) | C(7)  | C(6)  | C(5)   | 119.6(7) |
| O(1)  | Si(02) | C(13)  | 111.0(3) | C(10) | C(9)  | C(8)   | 118.7(6) |
| C(12) | Si(02) | C(14)  | 110.8(3) | C(6)  | C(7)  | C(8)   | 121.2(7) |
| C(13) | Si(02) | C(12)  | 108.0(3) | C(3)  | C(2)  | C(1)   | 59.6(4)  |
| C(13) | Si(02) | C(14)  | 112.1(3) | C(4)  | C(2)  | C(1)   | 122.3(5) |
| C(1)  | O(1)   | Si(02) | 129.0(4) | C(4)  | C(2)  | C(3)   | 122.7(5) |
| C(3)  | O(2)   | C(11)  | 113.1(5) | C(7)  | C(8)  | C(9)   | 120.0(6) |
| C(3)  | N(1)   | S(001) | 116.2(4) | C(16) | C(14) | Si(02) | 109.7(4) |
| C(5)  | C(10)  | C(9)   | 121.3(6) | C(16) | C(14) | C(17)  | 109.5(5) |
| C(10) | C(5)   | C(1)   | 121.9(6) | C(17) | C(14) | Si(02) | 109.4(4) |
| C(10) | C(5)   | C(6)   | 119.2(6) | C(15) | C(14) | Si(02) | 109.8(4) |
| C(6)  | C(5)   | C(1)   | 118.7(6) | C(15) | C(14) | C(16)  | 109.2(5) |
| O(1)  | C(1)   | C(5)   | 114.4(5) | C(15) | C(14) | C(17)  | 109.2(6) |
| O(1)  | C(1)   | C(3)   | 114.5(5) | C(19) | C(18) | S(001) | 108.6(4) |

---

|      |      |      |          |       |       |        |          |
|------|------|------|----------|-------|-------|--------|----------|
| O(1) | C(1) | C(2) | 117.9(5) | C(19) | C(18) | C(21)  | 110.4(6) |
| C(5) | C(1) | C(3) | 120.0(5) | C(20) | C(18) | S(001) | 110.4(5) |
| C(5) | C(1) | C(2) | 119.7(5) | C(20) | C(18) | C(19)  | 113.2(7) |
| C(3) | C(1) | C(2) | 59.3(4)  | C(20) | C(18) | C(21)  | 110.8(6) |
| O(2) | C(3) | N(1) | 117.2(5) | C(21) | C(18) | S(001) | 103.0(5) |
| O(2) | C(3) | C(1) | 113.1(5) |       |       |        |          |

---
